# Supplementary material
Source: HighWire-hosted journal article supplement (https://www.rsfjournal.org/highwire/filestream/2903/field_highwire_adjunct_files/0/Allen_et_al_appendix.pdf)
Supplement: Allen_et_al_appendix.pdf [file Allen_et_al_appendix.pdf]

Table 1  
*List of States by Largest Black Population, Institution Name, and Institution Type*

| State          | Number and Percent of State Total |       | Institution Name                                                                                                 | Institution Type            |
|----------------|-----------------------------------|-------|------------------------------------------------------------------------------------------------------------------|-----------------------------|
| Florida        | 3,401,179                         | 17.3% | University of Florida<br>Florida A&M Univ.<br>Florida Atlantic Univ.                                             | Flagship<br>HBCU<br>BSI     |
| Texas          | 3,390,604                         | 12.8% | Univ. of Texas at Austin<br>Texas Southern Univ.<br>Univ. of Houston, Downtown                                   | Flagship<br>HBCU<br>BSI     |
| New York       | 3,344,602                         | 17.0% | SUNY, Albany<br>CUNY, Medgar Evers College<br>CUNY, City College                                                 | Flagship<br>BSI<br>BSI      |
| Georgia        | 3,212,824                         | 32.1% | Univ. of Georgia<br>Savannah State Univ.<br>Georgia State Univ.                                                  | Flagship<br>HBCU<br>BSI     |
| California     | 2,710,216                         | 7.1%  | Univ. of California, Berkeley<br>Univ. of California, Los Angeles<br>California State Univ., Dominguez Hills     | Flagship<br>Flagship<br>BSI |
| North Carolina | 2,241,952                         | 22.8% | Univ. of North Carolina at Chapel Hill<br>North Carolina A&T State Univ.<br>Univ. of North Carolina at Charlotte | Flagship<br>HBCU<br>BSI     |
| Illinois       | 1,972,360                         | 15.3% | Univ. of Illinois-Urbana Champaign<br>Chicago State Univ.<br>Southern Illinois Univ., Carbondale                 | Flagship<br>BSI<br>BSI      |
| Maryland       | 1,848,257                         | 31.2% | Univ. of Maryland, College Park<br>Morgan State Univ.<br>Univ. of Maryland, Baltimore County                     | Flagship<br>HBCU<br>BSI     |
| Virginia       | 1,717,174                         | 20.8% | Univ. of Virginia<br>Norfolk State Univ.<br>Old Dominion Univ.                                                   | Flagship<br>HBCU<br>BSI     |
| Ohio           | 1,585,347                         | 13.7% | The Ohio State Univ.<br>Central State Univ.<br>Cleveland State Univ.                                             | Flagship<br>HBCU<br>BSI     |
| Pennsylvania   | 1,561,343                         | 12.2% | Pennsylvania State College, Univ. Park<br>Lincoln Univ.<br>Temple Univ.                                          | Flagship<br>HBCU<br>BSI     |
| Louisiana      | 1,528,695                         | 33.1% | Louisiana State Univ.<br>Southern Univ. and A&M College<br>Northwestern State Univ. of Louisiana                 | Flagship<br>HBCU<br>BSI     |
| Michigan       | 1,509,779                         | 15.2% | Univ. of Michigan, Ann Arbor<br>Michigan State Univ.<br>Wayne State Univ.                                        | Flagship<br>BSI<br>BSI      |
| South Carolina | 1,367,604                         | 28.6% | Univ. of South Carolina, Columbia<br>South Carolina State University<br>Francis Marion University                | Flagship<br>HBCU<br>BSI     |
| New Jersey     | 1,314,132                         | 14.8% | Rutgers Univ., New Brunswick<br>Kean Univ.<br>Rutgers Univ., Newark                                              | Flagship<br>BSI<br>BSI      |
| Alabama        | 1,312,584                         | 27.2% | Univ. of Alabama<br>Alabama State Univ.<br>Univ. of Alabama Birmingham                                           | Flagship<br>HBCU<br>BSI     |
| Tennessee      | 1,150,035                         | 17.7% | University of Tennessee<br>Tennessee State University<br>Middle Tennessee State Univ.                            | Flagship<br>HBCU<br>BSI     |
| Mississippi    | 1,136,159                         | 38.0% | Univ. of Mississippi<br>Jackson State Univ.<br>Univ. of Southern Mississippi                                     | Flagship<br>HBCU<br>BSI     |
| Missouri       | 764,195                           | 12.6% | Univ. of Missouri<br>Lincoln Univ.<br>Univ. of Missouri St. Louis                                                | Flagship<br>HBCU<br>BSI     |
| Indiana        | 678,881                           | 10.3% | Indiana Univ. Bloomington<br>Indiana State Univ.<br>Indiana Univ. Purdue Univ. Indianapolis                      | Flagship<br>BSI<br>BSI      |

Note: Historically Black College and University (HBCU), Black-Serving Institution (BSI)

Figs. 1 - 9.1

Percent Black Undergraduate and Graduate/Professional Enrollment and Degree Completion by Selected States

Fig. 1

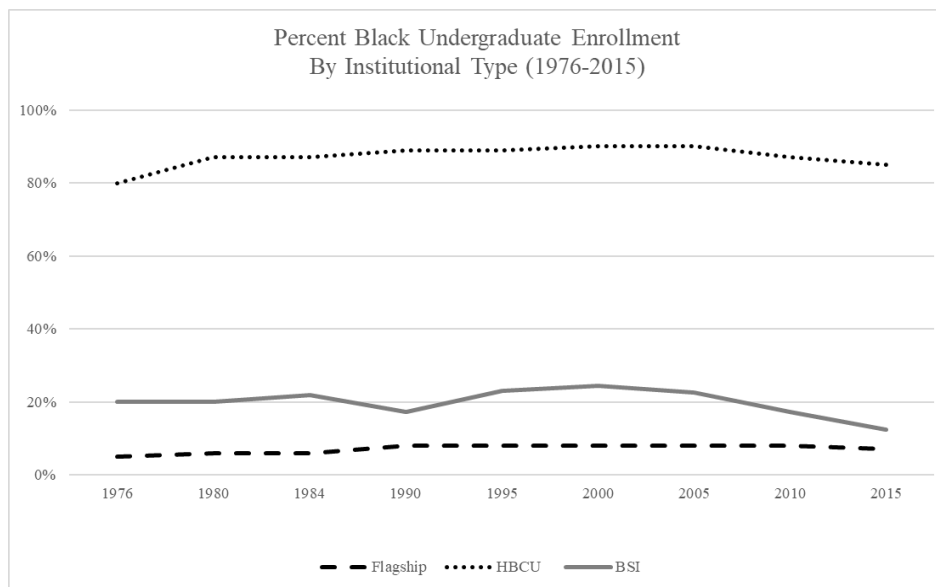

Fig. 1.1

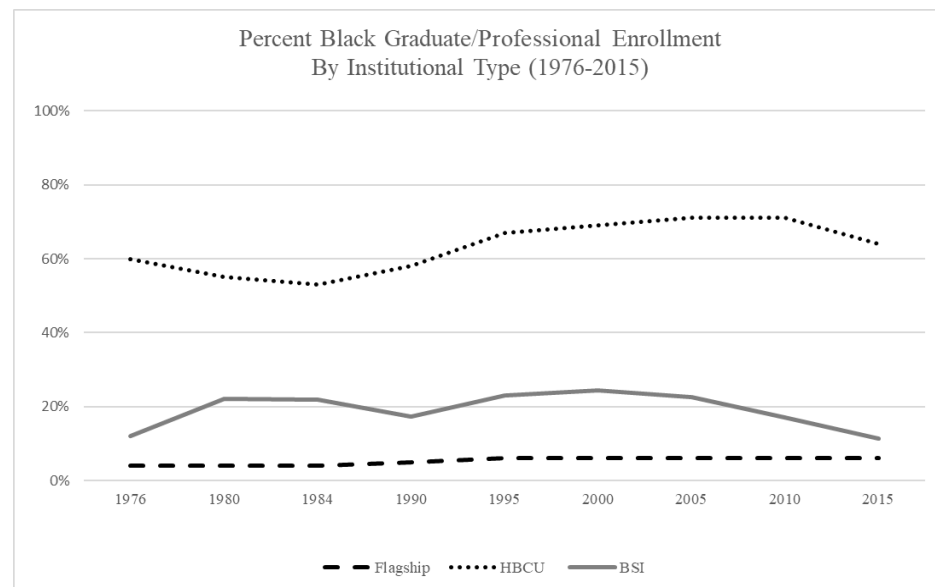

Fig. 2

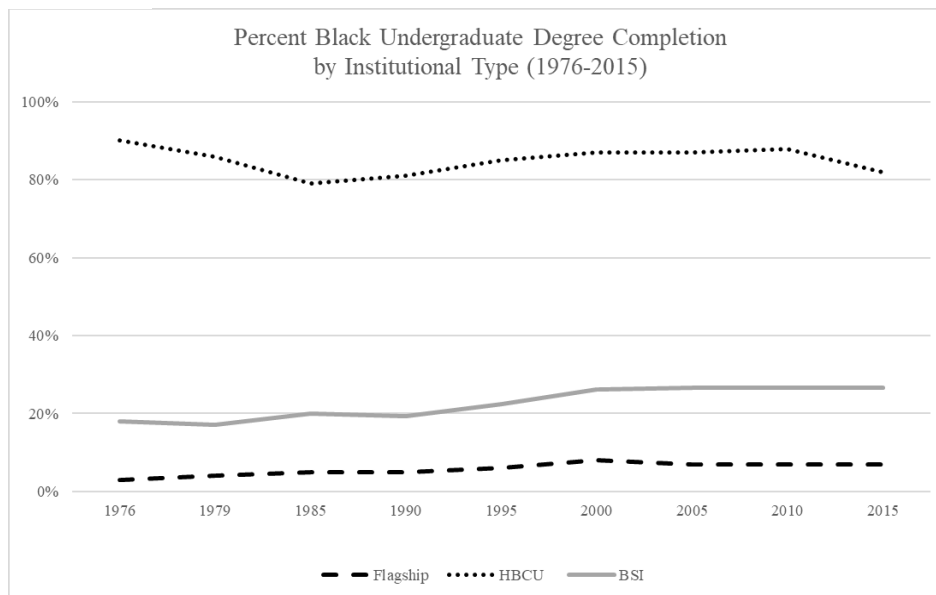

Fig. 2.2

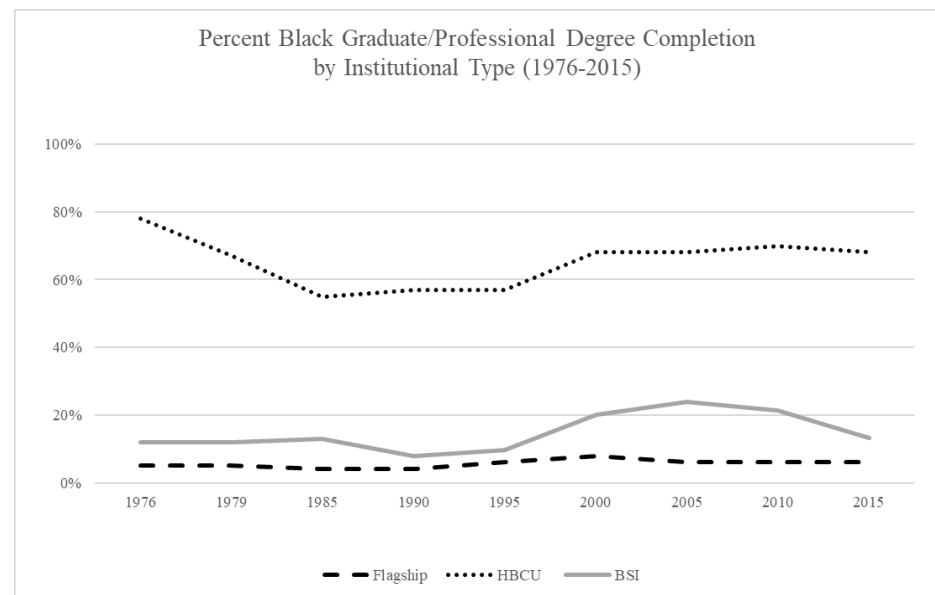

Fig. 3

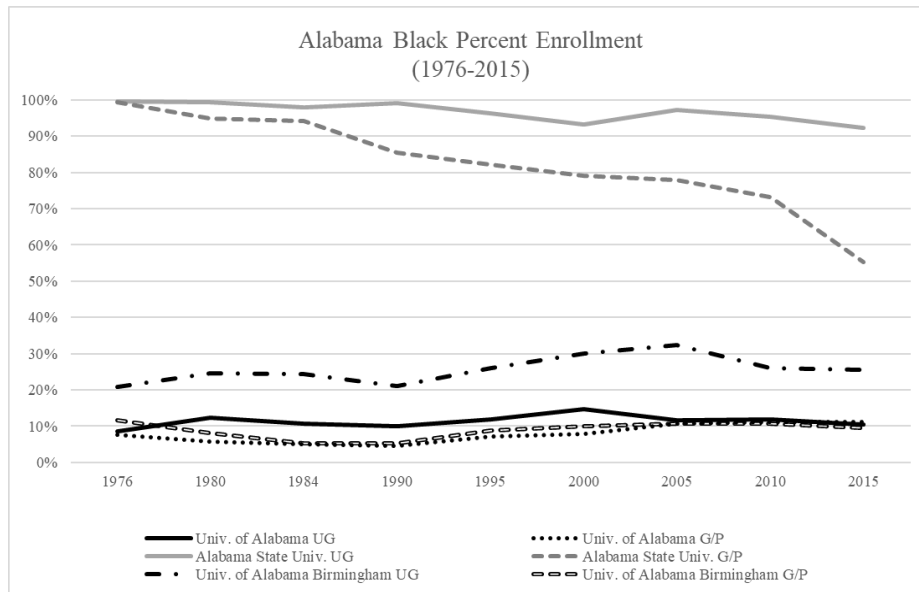

Fig. 3.1

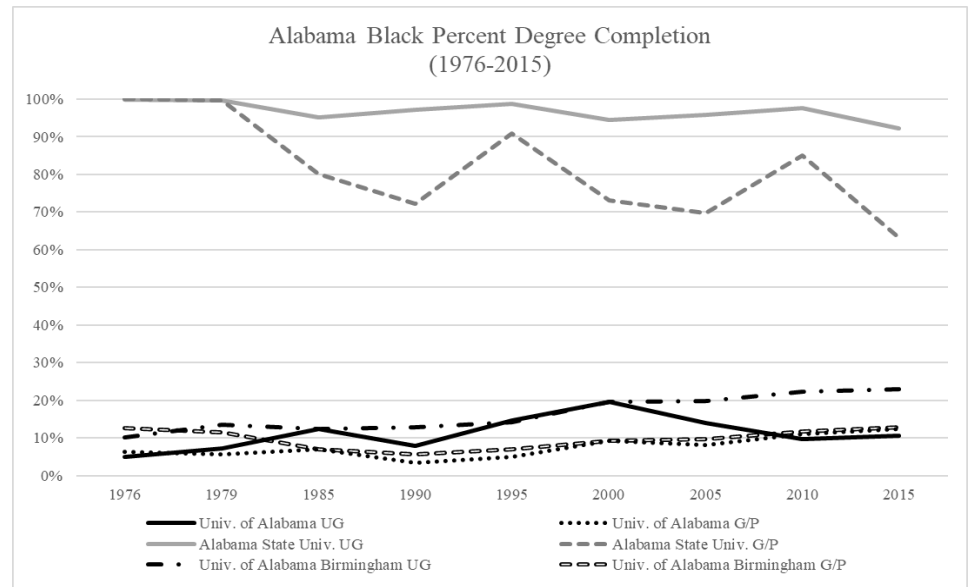

Fig. 4

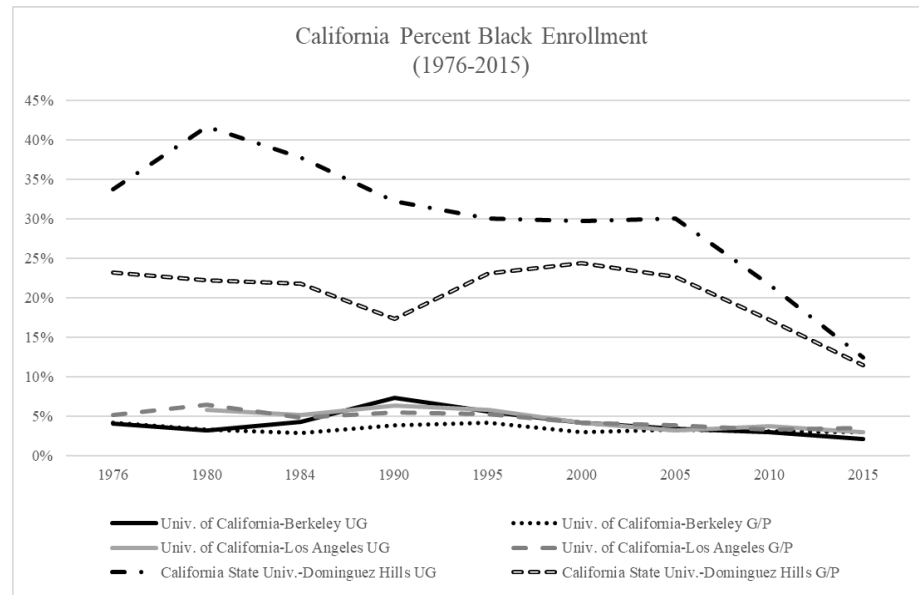

Fig. 4.1

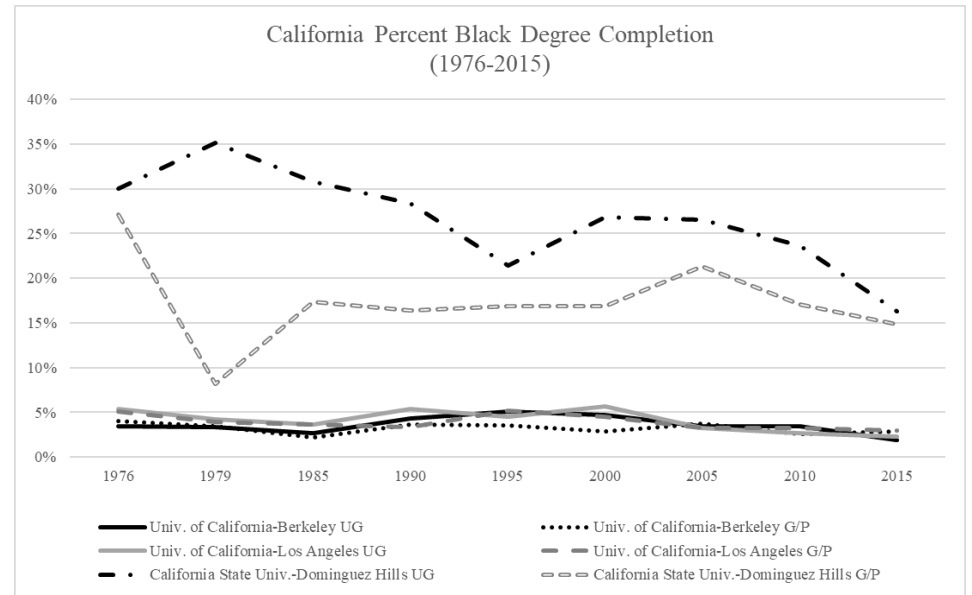

Fig. 5

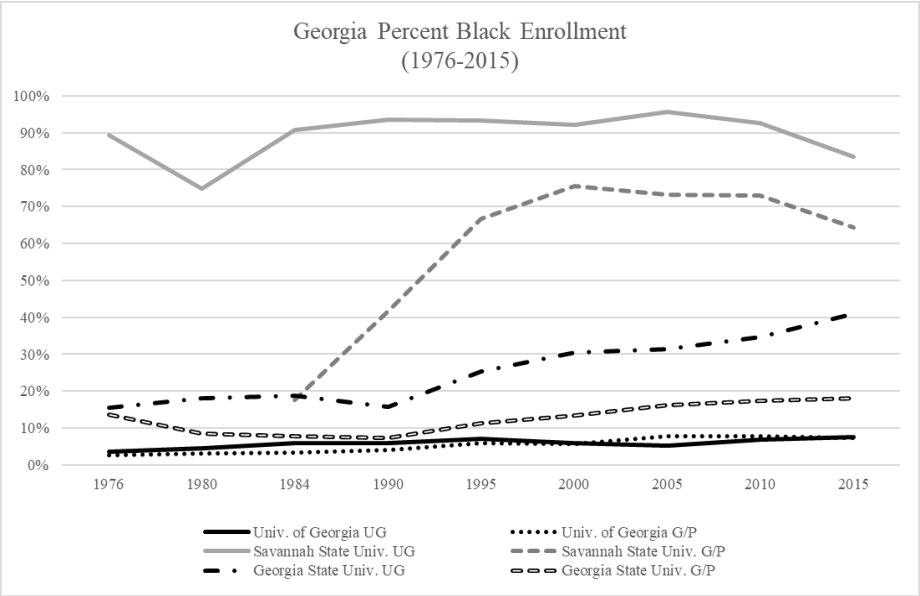

Fig. 6

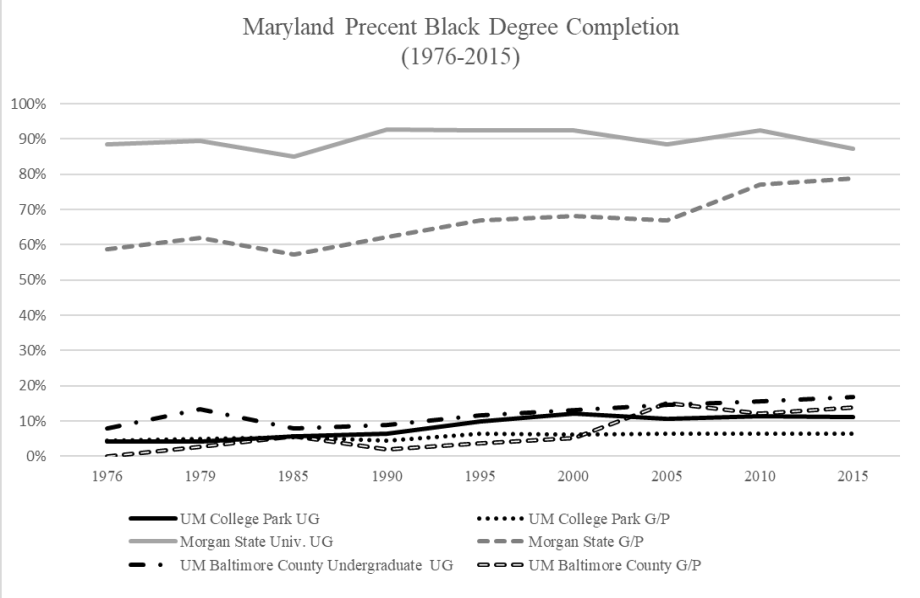

Fig. 5.1

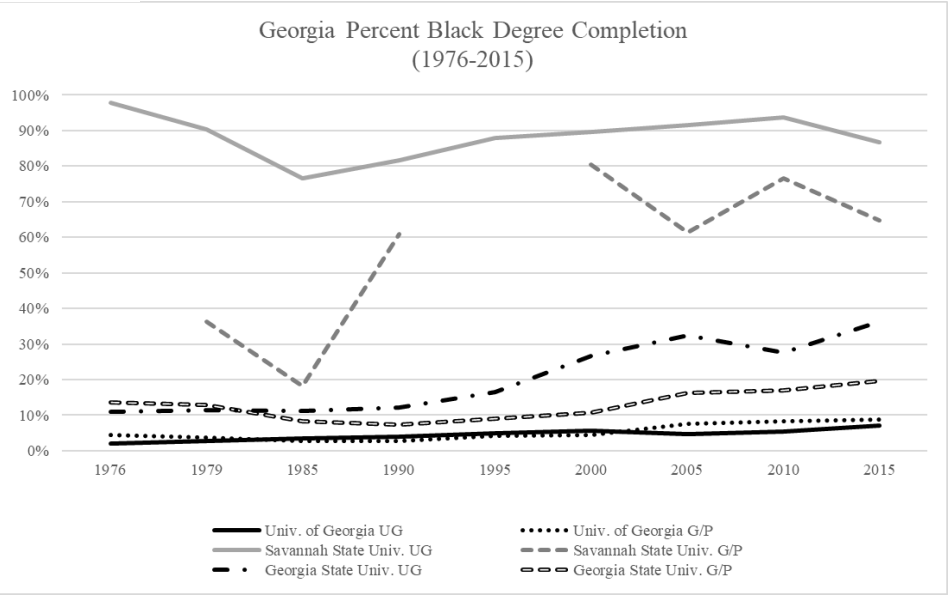

Fig. 6.1

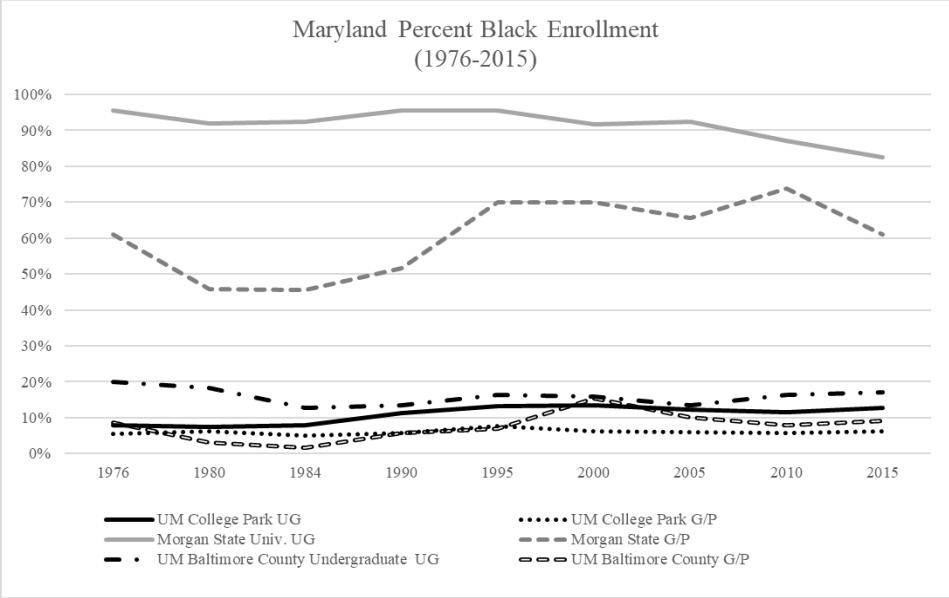

Fig. 7

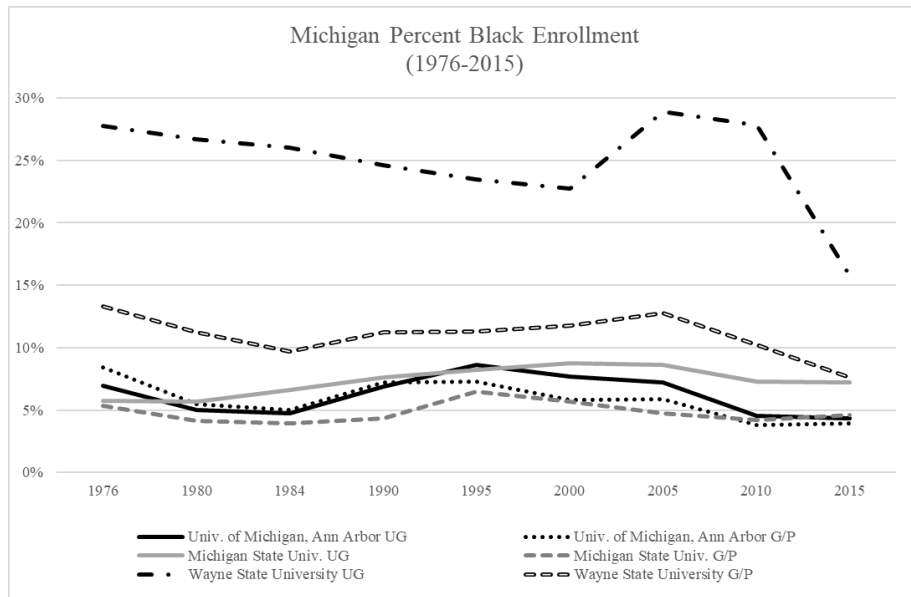

Fig. 7.1

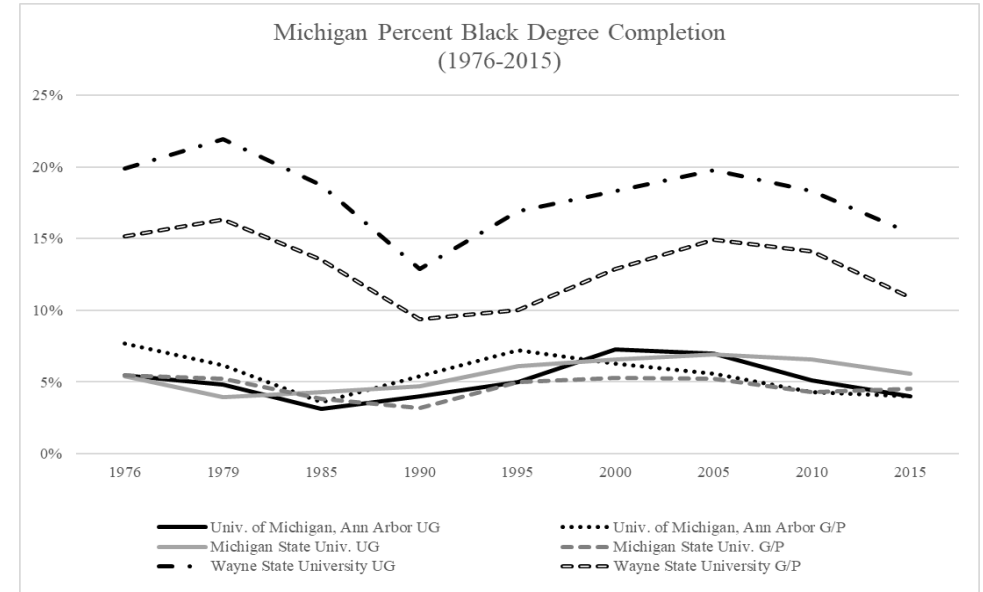

Fig. 8

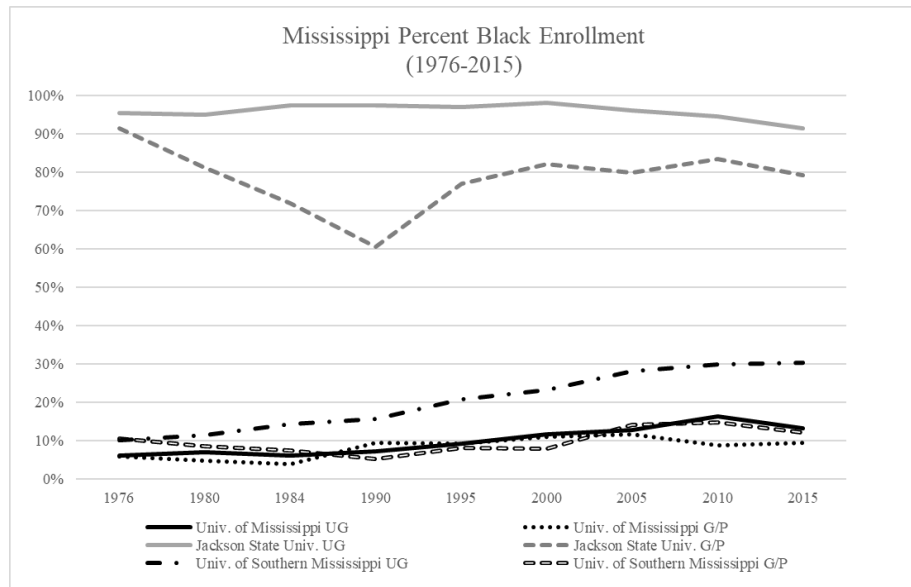

Fig. 8.1

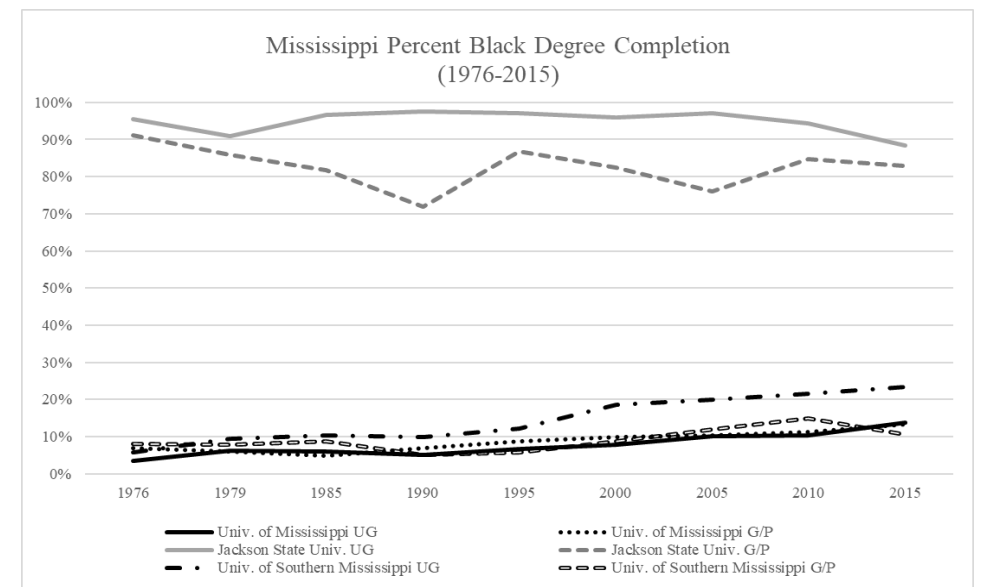

Fig. 9

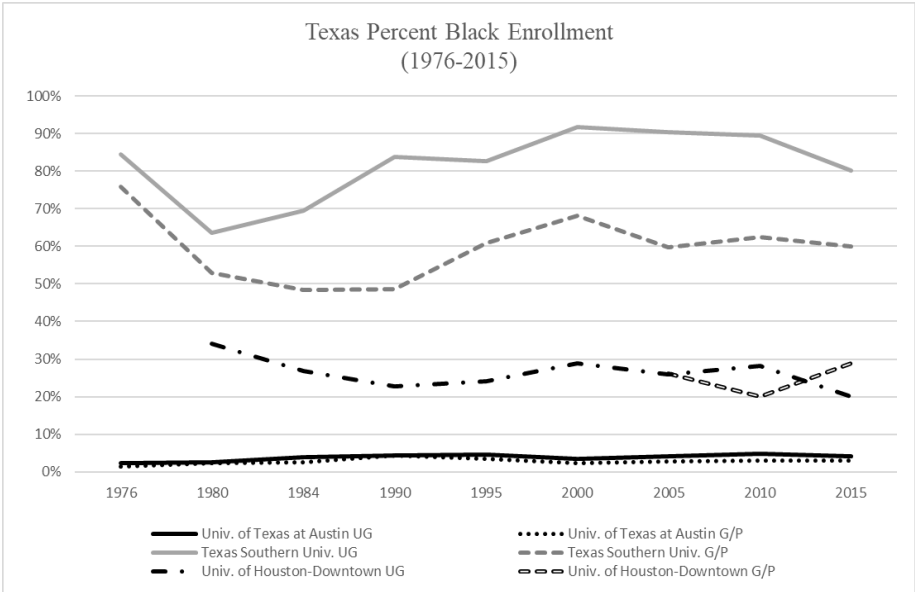

Fig. 9.1

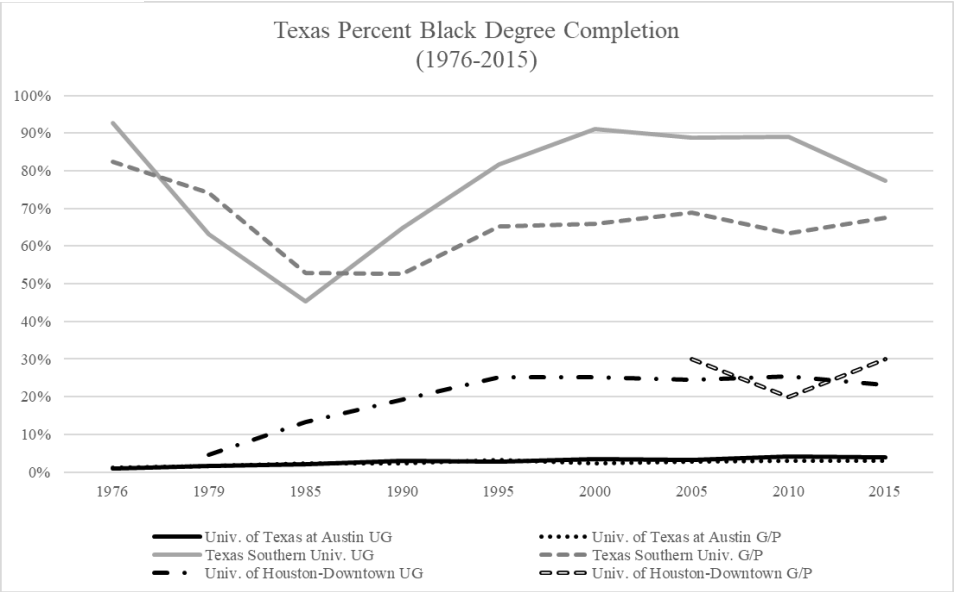

Table 2

*Percent Black Enrollment by Gender from 1976 to 2015, 5-Year Intervals*

| Institution                                   | 1976        |             |             |           | 1980        |             |             |           | 1984        |             |             |           | 1990        |             |             |           |
|-----------------------------------------------|-------------|-------------|-------------|-----------|-------------|-------------|-------------|-----------|-------------|-------------|-------------|-----------|-------------|-------------|-------------|-----------|
|                                               | Grand Total | Black Total | Black Women | Black Men | Grand Total | Black Total | Black Women | Black Men | Grand Total | Black Total | Black Women | Black Men | Grand Total | Black Total | Black Women | Black Men |
| <b>ALABAMA</b>                                |             |             |             |           |             |             |             |           |             |             |             |           |             |             |             |           |
| <b>Univ. of Alabama</b>                       |             |             |             |           |             |             |             |           |             |             |             |           |             |             |             |           |
| Enrollment: Undergraduate                     | 12,835      | 8.5%        | 5.0%        | 3.5%      | 13,342      | 12.2%       | 7.4%        | 4.8%      | 11,102      | 10.6%       | 6.3%        | 4.3%      | 14,767      | 9.9%        | 6.0%        | 3.9%      |
| Enrollment: Graduate/Professional             | 3,618       | 7.6%        | 4.8%        | 2.7%      | 1,689       | 5.7%        | 4.2%        | 1.5%      | 1,556       | 5.0%        | 3.2%        | 1.8%      | 2,094       | 4.5%        | 3.1%        | 1.5%      |
| <b>Alabama State Univ.</b>                    |             |             |             |           |             |             |             |           |             |             |             |           |             |             |             |           |
| Enrollment: Undergraduate                     | 3,209       | 99.7%       | 56.2%       | 43.5%     | 3,328       | 99.5%       | 59.2%       | 40.3%     | 3,102       | 97.9%       | 53.8%       | 44.1%     | 3,376       | 99.1%       | 57.6%       | 41.6%     |
| Enrollment: Graduate/Professional             | 891         | 99.3%       | 69.4%       | 30.0%     | 139         | 95.0%       | 66.2%       | 28.8%     | 105         | 94.3%       | 66.7%       | 27.6%     | 90          | 85.6%       | 70.0%       | 15.6%     |
| <b>Univ. of Alabama Birmingham</b>            |             |             |             |           |             |             |             |           |             |             |             |           |             |             |             |           |
| Enrollment: Undergraduate                     | 7,788       | 20.7%       | 14.2%       | 6.5%      | 5,906       | 24.6%       | 18.2%       | 6.4%      | 5,449       | 24.3%       | 18.2%       | 6.1%      | 6,361       | 21.1%       | 15.2%       | 5.9%      |
| Enrollment: Graduate/Professional             | 3,059       | 11.7%       | 7.7%        | 4.0%      | 2,147       | 8.1%        | 4.8%        | 3.4%      | 1,808       | 5.3%        | 2.9%        | 2.3%      | 2,474       | 5.2%        | 3.3%        | 1.9%      |
| <b>CALIFORNIA</b>                             |             |             |             |           |             |             |             |           |             |             |             |           |             |             |             |           |
| <b>Univ. of California-Berkeley</b>           |             |             |             |           |             |             |             |           |             |             |             |           |             |             |             |           |
| Enrollment: Undergraduate                     | 19,837      | 4.0%        | 2.1%        | 1.9%      | 19,356      | 3.2%        | 1.7%        | 1.5%      | 19,782      | 4.3%        | 2.3%        | 2.0%      | 19,247      | 7.3%        | 4.3%        | 3.0%      |
| Enrollment: Graduate/Professional             | 9,425       | 4.1%        | 2.1%        | 2.1%      | 8,796       | 3.3%        | 1.7%        | 1.6%      | 8,483       | 2.8%        | 1.4%        | 1.4%      | 7,897       | 3.8%        | 2.0%        | 1.8%      |
| <b>Univ. of California-Los Angeles</b>        |             |             |             |           |             |             |             |           |             |             |             |           |             |             |             |           |
| Enrollment: Undergraduate                     | 20,588      | 5.3%        | 3.1%        | 2.2%      | 19,894      | 5.8%        | 3.5%        | 2.3%      | 20,403      | 5.1%        | 3.3%        | 1.8%      | 22,475      | 6.3%        | 3.9%        | 2.4%      |
| Enrollment: Graduate/Professional             | 10,303      | 5.1%        | 2.5%        | 2.6%      | 9,685       | 6.4%        | 3.3%        | 3.1%      | 11,314      | 4.8%        | 2.3%        | 2.5%      | 10,941      | 5.4%        | 2.8%        | 2.6%      |
| <b>California State Univ. Dominguez Hills</b> |             |             |             |           |             |             |             |           |             |             |             |           |             |             |             |           |
| Enrollment: Undergraduate                     | 5,202       | 33.8%       | 16.2%       | 17.6%     | 3,561       | 41.7%       | 27.6%       | 14.1%     | 3,855       | 37.7%       | 25.3%       | 12.4%     | 3,759       | 32.2%       | 22.5%       | 9.7%      |
| Enrollment: Graduate/Professional             | 768         | 23.2%       | 14.1%       | 9.1%      | 189         | 22.2%       | 15.9%       | 6.3%      | 124         | 21.8%       | 14.5%       | 7.3%      | 370         | 17.3%       | 11.4%       | 5.9%      |
| <b>FLORIDA</b>                                |             |             |             |           |             |             |             |           |             |             |             |           |             |             |             |           |
| <b>Univ. of Florida</b>                       |             |             |             |           |             |             |             |           |             |             |             |           |             |             |             |           |
| Enrollment: Undergraduate                     | 20,852      | 4.8%        | 2.6%        | 2.2%      | 22,908      | 5.2%        | 2.9%        | 2.3%      | 23,882      | 6.2%        | 3.7%        | 2.6%      | 22,458      | 7.1%        | 4.3%        | 2.8%      |
| Enrollment: Graduate/Professional             | 6,206       | 3.4%        | 1.5%        | 2.0%      | 5,060       | 3.9%        | 1.8%        | 2.0%      | 5,128       | 3.8%        | 1.9%        | 1.9%      | 5,932       | 4.3%        | 2.3%        | 2.0%      |
| <b>Florida A &amp; M Univ.</b>                |             |             |             |           |             |             |             |           |             |             |             |           |             |             |             |           |
| Enrollment: Undergraduate                     | 4,896       | 89.4%       | 46.2%       | 43.1%     | 4,474       | 92.4%       | 48.3%       | 44.1%     | 4,040       | 90.6%       | 50.4%       | 40.1%     | 6,722       | 92.2%       | 54.3%       | 37.9%     |
| Enrollment: Graduate/Professional             | 140         | 75.0%       | 49.3%       | 25.7%     | 47          | 74.5%       | 42.6%       | 31.9%     | 92          | 60.9%       | 32.6%       | 28.3%     | 173         | 69.9%       | 45.7%       | 24.3%     |
| <b>Florida Atlantic Univ.</b>                 |             |             |             |           |             |             |             |           |             |             |             |           |             |             |             |           |
| Enrollment: Undergraduate                     | 4,425       | 5.5%        | 4.0%        | 1.5%      | 2,951       | 4.6%        | 2.9%        | 1.7%      | 3,312       | 4.6%        | 2.6%        | 2.0%      | 4,431       | 7.3%        | 4.1%        | 3.2%      |
| Enrollment: Graduate/Professional             | 1,017       | 6.2%        | 4.2%        | 2.0%      | 328         | 3.7%        | 2.1%        | 1.5%      | 289         | 5.9%        | 4.8%        | 1.0%      | 547         | 2.9%        | 1.3%        | 1.6%      |

| Institution                                   | 1995        |             |             |           | 2000        |             |             |           | 2005        |             |             |           | 2010        |             |             |           |
|-----------------------------------------------|-------------|-------------|-------------|-----------|-------------|-------------|-------------|-----------|-------------|-------------|-------------|-----------|-------------|-------------|-------------|-----------|
|                                               | Grand Total | Black Total | Black Women | Black Men | Grand Total | Black Total | Black Women | Black Men | Grand Total | Black Total | Black Women | Black Men | Grand Total | Black Total | Black Women | Black Men |
| <b>ALABAMA</b>                                |             |             |             |           |             |             |             |           |             |             |             |           |             |             |             |           |
| <b>Univ. of Alabama</b>                       |             |             |             |           |             |             |             |           |             |             |             |           |             |             |             |           |
| Enrollment: Undergraduate                     | 13061       | 11.9%       | 7.2%        | 4.7%      | 13764       | 14.8%       | 9.2%        | 5.6%      | 15735       | 11.5%       | 7.3%        | 4.2%      | 22587       | 11.8%       | 7.0%        | 4.8%      |
| Enrollment: Graduate/Professional             | 2303        | 7.1%        | 4.9%        | 2.3%      | 2554        | 7.9%        | 5.2%        | 2.7%      | 2709        | 10.7%       | 7.6%        | 3.1%      | 2991        | 11.2%       | 8.2%        | 3.0%      |
| <b>Alabama State Univ.</b>                    |             |             |             |           |             |             |             |           |             |             |             |           |             |             |             |           |
| Enrollment: Undergraduate                     | 4256        | 96.2%       | 53.4%       | 42.8%     | 3607        | 93.2%       | 53.5%       | 39.7%     | 3955        | 97.2%       | 57.9%       | 39.3%     | 4506        | 95.5%       | 56.0%       | 39.5%     |
| Enrollment: Graduate/Professional             | 162         | 82.1%       | 58.6%       | 23.5%     | 187         | 79.1%       | 54.0%       | 25.1%     | 255         | 78.0%       | 54.9%       | 23.1%     | 327         | 73.1%       | 51.1%       | 22.0%     |
| <b>Univ. of Alabama Birmingham</b>            |             |             |             |           |             |             |             |           |             |             |             |           |             |             |             |           |
| Enrollment: Undergraduate                     | 6711        | 25.9%       | 17.1%       | 8.8%      | 7064        | 30.1%       | 21.4%       | 8.7%      | 8012        | 32.5%       | 23.6%       | 8.9%      | 8144        | 25.9%       | 17.5%       | 8.4%      |
| Enrollment: Graduate/Professional             | 2993        | 8.9%        | 6.3%        | 2.5%      | 3328        | 10.0%       | 7.1%        | 2.9%      | 3267        | 10.6%       | 8.1%        | 2.5%      | 3683        | 10.8%       | 8.4%        | 2.3%      |
| <b>CALIFORNIA</b>                             |             |             |             |           |             |             |             |           |             |             |             |           |             |             |             |           |
| <b>Univ. of California-Berkeley</b>           |             |             |             |           |             |             |             |           |             |             |             |           |             |             |             |           |
| Enrollment: Undergraduate                     | 19,475      | 5.6%        | 3.3%        | 2.3%      | 21,047      | 4.2%        | 2.6%        | 1.5%      | 22,271      | 3.4%        | 2.2%        | 1.2%      | 24,929      | 3.0%        | 1.8%        | 1.2%      |
| Enrollment: Graduate/Professional             | 7,530       | 4.1%        | 2.3%        | 1.7%      | 7,633       | 3.0%        | 1.9%        | 1.1%      | 8,580       | 3.3%        | 2.1%        | 1.2%      | 9,304       | 3.1%        | 1.9%        | 1.2%      |
| <b>Univ. of California-Los Angeles</b>        |             |             |             |           |             |             |             |           |             |             |             |           |             |             |             |           |
| Enrollment: Undergraduate                     | 22,339      | 5.8%        | 3.4%        | 2.4%      | 23,873      | 4.2%        | 2.6%        | 1.5%      | 23,852      | 3.2%        | 2.0%        | 1.2%      | 25,434      | 3.7%        | 2.3%        | 1.4%      |
| Enrollment: Graduate/Professional             | 8,690       | 5.2%        | 3.2%        | 2.0%      | 11,438      | 4.1%        | 2.6%        | 1.5%      | 10,587      | 3.8%        | 2.4%        | 1.4%      | 11,547      | 3.3%        | 2.1%        | 1.2%      |
| <b>California State Univ. Dominguez Hills</b> |             |             |             |           |             |             |             |           |             |             |             |           |             |             |             |           |
| Enrollment: Undergraduate                     | 4,377       | 30.0%       | 20.6%       | 9.4%      | 4,630       | 29.7%       | 21.8%       | 7.9%      | 5,358       | 30.0%       | 21.9%       | 8.1%      | 7,126       | 21.7%       | 15.2%       | 6.5%      |
| Enrollment: Graduate/Professional             | 359         | 23.1%       | 17.3%       | 5.8%      | 1,472       | 24.4%       | 18.1%       | 6.3%      | 1,353       | 22.6%       | 17.1%       | 5.5%      | 1,283       | 17.2%       | 13.6%       | 3.7%      |
| <b>FLORIDA</b>                                |             |             |             |           |             |             |             |           |             |             |             |           |             |             |             |           |
| <b>Univ. of Florida</b>                       |             |             |             |           |             |             |             |           |             |             |             |           |             |             |             |           |
| Enrollment: Undergraduate                     | 25,934      | 6.5%        | 3.5%        | 3.0%      | 29,452      | 8.3%        | 5.4%        | 3.0%      | 31,742      | 9.0%        | 5.6%        | 3.4%      | 30,249      | 9.6%        | 6.4%        | 3.2%      |
| Enrollment: Graduate/Professional             | 6,751       | 6.1%        | 3.8%        | 2.3%      | 9,686       | 5.2%        | 3.4%        | 1.7%      | 11,469      | 3.9%        | 2.6%        | 1.4%      | 12,818      | 4.0%        | 2.6%        | 1.4%      |
| <b>Florida A &amp; M Univ.</b>                |             |             |             |           |             |             |             |           |             |             |             |           |             |             |             |           |
| Enrollment: Undergraduate                     | 7,762       | 92.8%       | 53.7%       | 39.1%     | 9,238       | 95.8%       | 56.3%       | 39.5%     | 9,272       | 95.0%       | 54.7%       | 40.2%     | 10,325      | 95.1%       | 57.6%       | 37.6%     |
| Enrollment: Graduate/Professional             | 595         | 78.3%       | 53.3%       | 25.0%     | 1,007       | 81.8%       | 57.9%       | 23.9%     | 1,285       | 72.7%       | 48.9%       | 23.7%     | 1,702       | 73.0%       | 47.2%       | 25.9%     |
| <b>Florida Atlantic Univ.</b>                 |             |             |             |           |             |             |             |           |             |             |             |           |             |             |             |           |
| Enrollment: Undergraduate                     | 6,788       | 10.8%       | 6.8%        | 4.0%      | 8,815       | 14.1%       | 9.5%        | 4.6%      | 11,703      | 16.9%       | 10.8%       | 6.1%      | 13,976      | 16.6%       | 9.8%        | 6.8%      |
| Enrollment: Graduate/Professional             | 778         | 5.3%        | 3.3%        | 1.9%      | 1,110       | 8.2%        | 6.0%        | 2.2%      | 1,489       | 7.9%        | 5.4%        | 2.6%      | 1,765       | 8.7%        | 5.9%        | 2.8%      |



| Institution                                   | 2015           |                |                |              |
|-----------------------------------------------|----------------|----------------|----------------|--------------|
|                                               | Grand<br>Total | Black<br>Total | Black<br>Women | Black<br>Men |
| <b>ALABAMA</b>                                |                |                |                |              |
| <b>Univ. of Alabama</b>                       |                |                |                |              |
| Enrollment: Undergraduate                     | 28447          | 10.5%          | 6.6%           | 3.9%         |
| Enrollment: Graduate/Professional             | 3321           | 11.1%          | 8.5%           | 2.6%         |
| <b>Alabama State Univ.</b>                    |                |                |                |              |
| Enrollment: Undergraduate                     | 4377           | 92.4%          | 57.5%          | 34.8%        |
| Enrollment: Graduate/Professional             | 291            | 55.3%          | 40.2%          | 15.1%        |
| <b>Univ. of Alabama Birmingham</b>            |                |                |                |              |
| Enrollment: Undergraduate                     | 8259           | 25.4%          | 16.9%          | 8.5%         |
| Enrollment: Graduate/Professional             | 3515           | 9.4%           | 7.1%           | 2.4%         |
| <b>CALIFORNIA</b>                             |                |                |                |              |
| <b>Univ. of California-Berkeley</b>           |                |                |                |              |
| Enrollment: Undergraduate                     | 26,622         | 2.1%           | 1.1%           | 0.9%         |
| Enrollment: Graduate/Professional             | 9,338          | 3.0%           | 1.8%           | 1.2%         |
| <b>Univ. of California-Los Angeles</b>        |                |                |                |              |
| Enrollment: Undergraduate                     | 29,000         | 3.0%           | 1.8%           | 1.1%         |
| Enrollment: Graduate/Professional             | 11,493         | 3.5%           | 2.3%           | 1.2%         |
| <b>California State Univ. Dominguez Hills</b> |                |                |                |              |
| Enrollment: Undergraduate                     | 9,173          | 12.4%          | 8.2%           | 4.2%         |
| Enrollment: Graduate/Professional             | 1,049          | 11.4%          | 8.7%           | 2.8%         |
| <b>FLORIDA</b>                                |                |                |                |              |
| <b>Univ. of Florida</b>                       |                |                |                |              |
| Enrollment: Undergraduate                     | 29,862         | 6.3%           | 4.1%           | 2.2%         |
| Enrollment: Graduate/Professional             | 12,479         | 4.7%           | 2.8%           | 2.0%         |
| <b>Florida A &amp; M Univ.</b>                |                |                |                |              |
| Enrollment: Undergraduate                     | 6,943          | 91.2%          | 59.0%          | 32.3%        |
| Enrollment: Graduate/Professional             | 1,523          | 72.0%          | 49.8%          | 22.3%        |
| <b>Florida Atlantic Univ.</b>                 |                |                |                |              |
| Enrollment: Undergraduate                     | 15,670         | 18.3%          | 11.1%          | 7.2%         |
| Enrollment: Graduate/Professional             | 2,014          | 13.9%          | 9.8%           | 4.0%         |

| Institution                                    | 1976        |             |             |           | 1980        |             |             |           | 1984        |             |             |           | 1990        |             |             |           |
|------------------------------------------------|-------------|-------------|-------------|-----------|-------------|-------------|-------------|-----------|-------------|-------------|-------------|-----------|-------------|-------------|-------------|-----------|
|                                                | Grand Total | Black Total | Black Women | Black Men | Grand Total | Black Total | Black Women | Black Men | Grand Total | Black Total | Black Women | Black Men | Grand Total | Black Total | Black Women | Black Men |
| <b>GEORGIA</b>                                 |             |             |             |           |             |             |             |           |             |             |             |           |             |             |             |           |
| <b>Univ. of Georgia</b>                        |             |             |             |           |             |             |             |           |             |             |             |           |             |             |             |           |
| Enrollment: Undergraduate                      | 16,759      | 3.6%        | 2.0%        | 1.6%      | 14,835      | 4.5%        | 2.6%        | 1.9%      | 17,275      | 5.9%        | 3.7%        | 2.2%      | 19,704      | 5.9%        | 3.7%        | 2.2%      |
| Enrollment: Graduate/Professional              | 4,178       | 2.6%        | 1.3%        | 1.3%      | 3,031       | 3.2%        | 2.0%        | 1.2%      | 3,388       | 3.3%        | 2.2%        | 1.1%      | 4,065       | 4.0%        | 2.6%        | 1.4%      |
| <b>Savannah State Univ.</b>                    |             |             |             |           |             |             |             |           |             |             |             |           |             |             |             |           |
| Enrollment: Undergraduate                      | 2,458       | 89.3%       | 54.2%       | 35.1%     | 1,720       | 74.8%       | 46.9%       | 28.0%     | 1,554       | 90.6%       | 53.3%       | 37.3%     | 1,885       | 93.6%       | 54.2%       | 39.4%     |
| Enrollment: Graduate/Professional              | 389         | 33.9%       | 23.4%       | 10.5%     | 11          | 0.0%        | 0.0%        | 0.0%      | 17          | 17.6%       | 11.8%       | 5.9%      | 24          | 41.7%       | 20.8%       | 20.8%     |
| <b>Georgia State Univ.</b>                     |             |             |             |           |             |             |             |           |             |             |             |           |             |             |             |           |
| Enrollment: Undergraduate                      | 13,278      | 15.5%       | 9.3%        | 6.1%      | 5,848       | 18.0%       | 12.3%       | 5.7%      | 6,207       | 18.8%       | 12.5%       | 6.3%      | 6,999       | 15.7%       | 11.4%       | 4.4%      |
| Enrollment: Graduate/Professional              | 7,005       | 13.6%       | 9.9%        | 3.7%      | 2,493       | 8.6%        | 5.4%        | 3.2%      | 2,504       | 7.9%        | 4.9%        | 3.0%      | 2,972       | 7.4%        | 5.3%        | 2.0%      |
| <b>ILLINOIS</b>                                |             |             |             |           |             |             |             |           |             |             |             |           |             |             |             |           |
| <b>Univ. of Illinois-Urbana Champaign</b>      |             |             |             |           |             |             |             |           |             |             |             |           |             |             |             |           |
| Enrollment: Undergraduate                      | 24,435      | 3.9%        | 2.2%        | 1.7%      | 25,259      | 3.9%        | 2.3%        | 1.7%      | 25,027      | 3.9%        | 2.1%        | 1.8%      | 25,353      | 7.3%        | 3.9%        | 3.4%      |
| Enrollment: Graduate/Professional              | 8,565       | 3.2%        | 1.4%        | 1.8%      | 6,174       | 2.1%        | 1.0%        | 1.1%      | 6,445       | 1.6%        | 0.7%        | 0.9%      | 7,036       | 2.6%        | 1.3%        | 1.3%      |
| <b>Chicago State Univ.</b>                     |             |             |             |           |             |             |             |           |             |             |             |           |             |             |             |           |
| Enrollment: Undergraduate                      | 4,361       | 76.1%       | 48.8%       | 27.4%     | 3,074       | 88.6%       | 60.1%       | 28.5%     | 3,554       | 90.9%       | 61.6%       | 29.3%     | 2,935       | 91.6%       | 64.5%       | 27.1%     |
| Enrollment: Graduate/Professional              | 841         | 47.1%       | 34.2%       | 12.8%     | 14          | 78.6%       | 35.7%       | 42.9%     | 42          | 66.7%       | 45.2%       | 21.4%     | 41          | 70.7%       | 34.1%       | 36.6%     |
| <b>Southern Illinois Univ., Carbondale</b>     |             |             |             |           |             |             |             |           |             |             |             |           |             |             |             |           |
| Enrollment: Undergraduate                      | 18,282      | 9.1%        | 4.4%        | 4.7%      | 17,925      | 9.2%        | 4.5%        | 4.8%      | 16,766      | 10.3%       | 4.7%        | 5.7%      | 17,753      | 10.5%       | 5.2%        | 5.3%      |
| Enrollment: Graduate/Professional              | 3,769       | 5.5%        | 2.8%        | 2.8%      | 1,360       | 5.1%        | 2.9%        | 2.2%      | 1,394       | 7.5%        | 4.4%        | 3.1%      | 1,258       | 8.6%        | 5.2%        | 3.4%      |
| <b>INDIANA</b>                                 |             |             |             |           |             |             |             |           |             |             |             |           |             |             |             |           |
| <b>Indiana Univ. Bloomington</b>               |             |             |             |           |             |             |             |           |             |             |             |           |             |             |             |           |
| Enrollment: Undergraduate                      | 23,233      | 4.8%        | 2.6%        | 2.3%      | 21596       | 5.7%        | 3.2%        | 2.4%      | 22875       | 4.9%        | 2.9%        | 2.0%      | 24942       | 4.2%        | 2.6%        | 1.5%      |
| Enrollment: Graduate/Professional              | 8,612       | 2.9%        | 1.4%        | 1.5%      | 4703        | 3.5%        | 1.5%        | 2.0%      | 4307        | 2.7%        | 1.5%        | 1.3%      | 4578        | 3.3%        | 1.7%        | 1.5%      |
| <b>Indiana State Univ.</b>                     |             |             |             |           |             |             |             |           |             |             |             |           |             |             |             |           |
| Enrollment: Undergraduate                      | 9,175       | 10.0%       | 5.3%        | 4.7%      | 8929        | 11.0%       | 5.8%        | 5.2%      | 8326        | 9.4%        | 4.8%        | 4.6%      | 8472        | 7.7%        | 3.9%        | 3.8%      |
| Enrollment: Graduate/Professional              | 2,339       | 2.1%        | 0.8%        | 1.3%      | 489         | 2.2%        | 1.6%        | 0.6%      | 594         | 1.5%        | 0.8%        | 0.7%      | 544         | 4.0%        | 2.0%        | 2.0%      |
| <b>Indiana Univ. Purdue Univ. Indianapolis</b> |             |             |             |           |             |             |             |           |             |             |             |           |             |             |             |           |
| Enrollment: Undergraduate                      | 12,427      | 10.9%       | 6.7%        | 4.2%      | 6000        | 9.9%        | 6.2%        | 3.7%      | 6962        | 7.6%        | 5.1%        | 2.6%      | 8584        | 7.8%        | 5.1%        | 2.7%      |
| Enrollment: Graduate/Professional              | 6,379       | 5.2%        | 3.1%        | 2.1%      | 2718        | 2.0%        | 1.1%        | 0.9%      | 2414        | 2.4%        | 1.7%        | 0.7%      | 2387        | 3.3%        | 2.4%        | 0.9%      |

| Institution                                    | 1995        |             |             |           | 2000        |             |             |           | 2005        |             |             |           | 2010        |             |             |           |
|------------------------------------------------|-------------|-------------|-------------|-----------|-------------|-------------|-------------|-----------|-------------|-------------|-------------|-----------|-------------|-------------|-------------|-----------|
|                                                | Grand Total | Black Total | Black Women | Black Men | Grand Total | Black Total | Black Women | Black Men | Grand Total | Black Total | Black Women | Black Men | Grand Total | Black Total | Black Women | Black Men |
| <b>GEORGIA</b>                                 |             |             |             |           |             |             |             |           |             |             |             |           |             |             |             |           |
| <b>Univ. of Georgia</b>                        |             |             |             |           |             |             |             |           |             |             |             |           |             |             |             |           |
| Enrollment: Undergraduate                      | 20,740      | 7.1%        | 4.8%        | 2.3%      | 21,533      | 5.9%        | 3.9%        | 2.0%      | 22,564      | 5.3%        | 3.4%        | 1.9%      | 24,299      | 6.9%        | 4.6%        | 2.2%      |
| Enrollment: Graduate/Professional              | 4,889       | 6.0%        | 4.1%        | 1.9%      | 5,138       | 5.7%        | 4.1%        | 1.6%      | 5,944       | 7.9%        | 5.8%        | 2.1%      | 6,713       | 7.7%        | 5.3%        | 2.3%      |
| <b>Savannah State Univ.</b>                    |             |             |             |           |             |             |             |           |             |             |             |           |             |             |             |           |
| Enrollment: Undergraduate                      | 2,784       | 93.2%       | 53.1%       | 40.2%     | 1,502       | 92.1%       | 55.1%       | 37.0%     | 2,365       | 95.6%       | 55.6%       | 40.0%     | 3,403       | 92.7%       | 51.6%       | 41.1%     |
| Enrollment: Graduate/Professional              | 6           | 66.7%       | 16.7%       | 50.0%     | 57          | 75.4%       | 66.7%       | 8.8%      | 60          | 73.3%       | 60.0%       | 13.3%     | 89          | 73.0%       | 60.7%       | 12.4%     |
| <b>Georgia State Univ.</b>                     |             |             |             |           |             |             |             |           |             |             |             |           |             |             |             |           |
| Enrollment: Undergraduate                      | 8,404       | 25.4%       | 18.1%       | 7.3%      | 9,889       | 30.5%       | 22.0%       | 8.5%      | 13,385      | 31.4%       | 22.0%       | 9.4%      | 17,408      | 34.7%       | 23.1%       | 11.6%     |
| Enrollment: Graduate/Professional              | 3,840       | 11.4%       | 8.0%        | 3.4%      | 3,330       | 13.4%       | 9.6%        | 3.8%      | 3,789       | 16.1%       | 12.0%       | 4.1%      | 5,100       | 17.3%       | 12.1%       | 5.2%      |
| <b>ILLINOIS</b>                                |             |             |             |           |             |             |             |           |             |             |             |           |             |             |             |           |
| <b>Univ. of Illinois-Urbana Champaign</b>      |             |             |             |           |             |             |             |           |             |             |             |           |             |             |             |           |
| Enrollment: Undergraduate                      | 25,662      | 7.1%        | 4.1%        | 3.0%      | 27,342      | 7.0%        | 4.3%        | 2.7%      | 29,658      | 6.6%        | 4.0%        | 2.6%      | 30,292      | 5.8%        | 3.5%        | 2.2%      |
| Enrollment: Graduate/Professional              | 7,735       | 4.6%        | 2.5%        | 2.1%      | 7,613       | 3.8%        | 2.5%        | 1.3%      | 8,719       | 3.9%        | 2.5%        | 1.4%      | 9,254       | 3.5%        | 2.1%        | 1.4%      |
| <b>Chicago State Univ.</b>                     |             |             |             |           |             |             |             |           |             |             |             |           |             |             |             |           |
| Enrollment: Undergraduate                      | 4,283       | 92.2%       | 66.0%       | 26.1%     | 3,227       | 89.6%       | 66.4%       | 23.3%     | 3,445       | 86.4%       | 62.7%       | 23.7%     | 3,828       | 86.1%       | 61.5%       | 24.6%     |
| Enrollment: Graduate/Professional              | 99          | 66.7%       | 42.4%       | 24.2%     | 312         | 75.0%       | 55.1%       | 19.9%     | 411         | 72.7%       | 52.6%       | 20.2%     | 730         | 53.3%       | 38.5%       | 14.8%     |
| <b>Southern Illinois Univ., Carbondale</b>     |             |             |             |           |             |             |             |           |             |             |             |           |             |             |             |           |
| Enrollment: Undergraduate                      | 16,074      | 12.7%       | 6.3%        | 6.5%      | 15,825      | 14.5%       | 7.8%        | 6.7%      | 14,958      | 16.9%       | 8.6%        | 8.3%      | 13,261      | 20.7%       | 11.2%       | 9.5%      |
| Enrollment: Graduate/Professional              | 2,126       | 7.3%        | 4.3%        | 3.0%      | 2,196       | 9.9%        | 6.5%        | 3.4%      | 2,335       | 10.3%       | 7.0%        | 3.3%      | 2,785       | 9.1%        | 5.9%        | 3.2%      |
| <b>INDIANA</b>                                 |             |             |             |           |             |             |             |           |             |             |             |           |             |             |             |           |
| <b>Indiana Univ. Bloomington</b>               |             |             |             |           |             |             |             |           |             |             |             |           |             |             |             |           |
| Enrollment: Undergraduate                      | 24219       | 4.3%        | 2.7%        | 1.5%      | 27052       | 4.0%        | 2.5%        | 1.6%      | 27873       | 4.6%        | 2.7%        | 1.9%      | 30888       | 4.5%        | 2.7%        | 1.8%      |
| Enrollment: Graduate/Professional              | 4744        | 4.4%        | 2.6%        | 1.8%      | 4763        | 3.8%        | 2.4%        | 1.4%      | 5498        | 4.3%        | 2.4%        | 1.9%      | 6479        | 4.2%        | 2.4%        | 1.7%      |
| <b>Indiana State Univ.</b>                     |             |             |             |           |             |             |             |           |             |             |             |           |             |             |             |           |
| Enrollment: Undergraduate                      | 7954        | 8.2%        | 4.2%        | 4.1%      | 8089        | 11.2%       | 5.7%        | 5.6%      | 7610        | 11.9%       | 6.0%        | 5.9%      | 8224        | 17.0%       | 8.5%        | 8.5%      |
| Enrollment: Graduate/Professional              | 683         | 6.4%        | 3.2%        | 3.2%      | 589         | 7.6%        | 5.8%        | 1.9%      | 798         | 9.6%        | 5.8%        | 3.9%      | 814         | 8.5%        | 5.7%        | 2.8%      |
| <b>Indiana Univ. Purdue Univ. Indianapolis</b> |             |             |             |           |             |             |             |           |             |             |             |           |             |             |             |           |
| Enrollment: Undergraduate                      | 9621        | 9.1%        | 6.1%        | 3.0%      | 11650       | 10.8%       | 7.2%        | 3.6%      | 13600       | 9.8%        | 6.6%        | 3.2%      | 15847       | 9.5%        | 6.3%        | 3.2%      |
| Enrollment: Graduate/Professional              | 2788        | 4.7%        | 3.0%        | 1.6%      | 3135        | 4.9%        | 3.3%        | 1.6%      | 3742        | 6.0%        | 4.2%        | 1.8%      | 4225        | 4.9%        | 3.5%        | 1.4%      |

| Institution                                    | 2015           |                |                |              |
|------------------------------------------------|----------------|----------------|----------------|--------------|
|                                                | Grand<br>Total | Black<br>Total | Black<br>Women | Black<br>Men |
| <b>GEORGIA</b>                                 |                |                |                |              |
| <b>Univ. of Georgia</b>                        |                |                |                |              |
| Enrollment: Undergraduate                      | 25,737         | 7.6%           | 4.8%           | 2.8%         |
| Enrollment: Graduate/Professional              | 6,640          | 7.3%           | 5.6%           | 1.7%         |
| <b>Savannah State Univ.</b>                    |                |                |                |              |
| Enrollment: Undergraduate                      | 4,030          | 83.5%          | 49.6%          | 33.8%        |
| Enrollment: Graduate/Professional              | 104            | 64.4%          | 51.9%          | 12.5%        |
| <b>Georgia State Univ.</b>                     |                |                |                |              |
| Enrollment: Undergraduate                      | 18,652         | 40.9%          | 27.2%          | 13.8%        |
| Enrollment: Graduate/Professional              | 5,075          | 18.1%          | 12.5%          | 5.6%         |
| <b>ILLINOIS</b>                                |                |                |                |              |
| <b>Univ. of Illinois-Urbana Champaign</b>      |                |                |                |              |
| Enrollment: Undergraduate                      | 31,552         | 5.5%           | 3.2%           | 2.3%         |
| Enrollment: Graduate/Professional              | 9,767          | 3.4%           | 2.1%           | 1.3%         |
| <b>Chicago State Univ.</b>                     |                |                |                |              |
| Enrollment: Undergraduate                      | 2,259          | 73.1%          | 53.7%          | 19.4%        |
| Enrollment: Graduate/Professional              | 736            | 42.0%          | 28.5%          | 13.5%        |
| <b>Southern Illinois Univ., Carbondale</b>     |                |                |                |              |
| Enrollment: Undergraduate                      | 11,255         | 19.6%          | 11.2%          | 8.4%         |
| Enrollment: Graduate/Professional              | 2,589          | 10.9%          | 7.1%           | 3.8%         |
| <b>INDIANA</b>                                 |                |                |                |              |
| <b>Indiana Univ. Bloomington</b>               |                |                |                |              |
| Enrollment: Undergraduate                      | 31559          | 4.2%           | 2.4%           | 1.8%         |
| Enrollment: Graduate/Professional              | 6275           | 3.2%           | 1.5%           | 1.8%         |
| <b>Indiana State Univ.</b>                     |                |                |                |              |
| Enrollment: Undergraduate                      | 9623           | 19.5%          | 11.2%          | 8.4%         |
| Enrollment: Graduate/Professional              | 991            | 9.3%           | 6.0%           | 3.3%         |
| <b>Indiana Univ. Purdue Univ. Indianapolis</b> |                |                |                |              |
| Enrollment: Undergraduate                      | 16932          | 9.2%           | 6.0%           | 3.1%         |
| Enrollment: Graduate/Professional              | 4575           | 7.4%           | 5.0%           | 2.4%         |

| Institution                                  | 1976        |             |             |           | 1980        |             |             |           | 1984        |             |             |           | 1990        |             |             |           |
|----------------------------------------------|-------------|-------------|-------------|-----------|-------------|-------------|-------------|-----------|-------------|-------------|-------------|-----------|-------------|-------------|-------------|-----------|
|                                              | Grand Total | Black Total | Black Women | Black Men | Grand Total | Black Total | Black Women | Black Men | Grand Total | Black Total | Black Women | Black Men | Grand Total | Black Total | Black Women | Black Men |
| <b>LOUISIANA</b>                             |             |             |             |           |             |             |             |           |             |             |             |           |             |             |             |           |
| <b>Louisiana State Univ.</b>                 |             |             |             |           |             |             |             |           |             |             |             |           |             |             |             |           |
| Enrollment: Undergraduate                    | 18,781      | 3.5%        | 2.1%        | 1.4%      | 19,975      | 6.2%        | 3.7%        | 2.5%      | 20,119      | 7.0%        | 4.1%        | 2.9%      | 16,639      | 7.5%        | 4.7%        | 2.8%      |
| Enrollment: Graduate/Professional            | 5,008       | 4.2%        | 2.6%        | 1.6%      | 2,221       | 3.1%        | 2.1%        | 1.0%      | 3,635       | 2.9%        | 2.0%        | 0.9%      | 3,527       | 3.1%        | 2.0%        | 1.1%      |
| <b>Southern Univ. and A &amp; M College</b>  |             |             |             |           |             |             |             |           |             |             |             |           |             |             |             |           |
| Enrollment: Undergraduate                    | 7,646       | 96.3%       | 53.2%       | 43.2%     | 6,417       | 92.8%       | 48.7%       | 44.1%     | 4,201       | 87.4%       | 46.1%       | 41.3%     | 7,167       | 96.8%       | 55.8%       | 41.0%     |
| Enrollment: Graduate/Professional            | 1,187       | 93.3%       | 61.3%       | 31.9%     | 331         | 75.5%       | 29.9%       | 45.6%     | 428         | 66.6%       | 27.6%       | 39.0%     | 548         | 61.3%       | 34.7%       | 26.6%     |
| <b>Northwestern State Univ. of Louisiana</b> |             |             |             |           |             |             |             |           |             |             |             |           |             |             |             |           |
| Enrollment: Undergraduate                    | 5,230       | 13.8%       | 7.5%        | 6.3%      | 3,176       | 21.7%       | 13.9%       | 7.8%      | 2,853       | 21.9%       | 12.2%       | 9.7%      | 4,296       | 20.6%       | 14.7%       | 6.0%      |
| Enrollment: Graduate/Professional            | 1,121       | 11.8%       | 8.7%        | 3.1%      | 192         | 9.9%        | 6.3%        | 3.6%      | 175         | 10.9%       | 5.7%        | 5.1%      | 122         | 8.2%        | 4.1%        | 4.1%      |
| <b>MARYLAND</b>                              |             |             |             |           |             |             |             |           |             |             |             |           |             |             |             |           |
| <b>Univ. of Maryland, College Park</b>       |             |             |             |           |             |             |             |           |             |             |             |           |             |             |             |           |
| Enrollment: Undergraduate                    | 25,895      | 7.8%        | 4.6%        | 3.2%      | 24,399      | 7.5%        | 4.5%        | 3.0%      | 24,375      | 8.0%        | 4.5%        | 3.5%      | 21,288      | 11.3%       | 6.2%        | 5.0%      |
| Enrollment: Graduate/Professional            | 7,141       | 5.5%        | 3.4%        | 2.1%      | 2,650       | 6.2%        | 3.7%        | 2.6%      | 3,102       | 4.9%        | 3.0%        | 1.9%      | 4,176       | 5.7%        | 3.3%        | 2.4%      |
| <b>Morgan State Univ.</b>                    |             |             |             |           |             |             |             |           |             |             |             |           |             |             |             |           |
| Enrollment: Undergraduate                    | 4,750       | 95.6%       | 54.0%       | 41.6%     | 3,614       | 91.9%       | 53.7%       | 38.2%     | 2,977       | 92.4%       | 52.8%       | 39.6%     | 3,095       | 95.6%       | 56.3%       | 39.2%     |
| Enrollment: Graduate/Professional            | 900         | 61.0%       | 29.9%       | 31.1%     | 146         | 45.9%       | 23.3%       | 22.6%     | 275         | 45.5%       | 24.0%       | 21.5%     | 205         | 51.7%       | 21.5%       | 30.2%     |
| <b>Univ. of Maryland, Baltimore County</b>   |             |             |             |           |             |             |             |           |             |             |             |           |             |             |             |           |
| Enrollment: Undergraduate                    | 5,135       | 19.9%       | 13.5%       | 6.4%      | 4,503       | 18.4%       | 12.8%       | 5.5%      | 5,646       | 12.8%       | 8.6%        | 4.2%      | 6,190       | 13.5%       | 8.7%        | 4.9%      |
| Enrollment: Graduate/Professional            | 207         | 8.7%        | 5.3%        | 3.4%      | 128         | 3.1%        | 2.3%        | 0.8%      | 172         | 1.7%        | 1.2%        | 0.6%      | 482         | 5.8%        | 2.9%        | 2.9%      |
| <b>MICHIGAN</b>                              |             |             |             |           |             |             |             |           |             |             |             |           |             |             |             |           |
| <b>Univ. of Michigan, Ann Arbor</b>          |             |             |             |           |             |             |             |           |             |             |             |           |             |             |             |           |
| Enrollment: Undergraduate                    | 22,120      | 6.9%        | 3.9%        | 3.1%      | 20,659      | 5.0%        | 2.9%        | 2.1%      | 20,422      | 4.7%        | 2.8%        | 1.9%      | 21,809      | 6.9%        | 4.0%        | 2.9%      |
| Enrollment: Graduate/Professional            | 14,743      | 8.4%        | 4.4%        | 4.0%      | 10,409      | 5.5%        | 3.0%        | 2.5%      | 10,117      | 5.0%        | 2.5%        | 2.5%      | 10,669      | 7.2%        | 4.1%        | 3.1%      |
| <b>Michigan State Univ.</b>                  |             |             |             |           |             |             |             |           |             |             |             |           |             |             |             |           |
| Enrollment: Undergraduate                    | 35,561      | 5.8%        | 3.4%        | 2.3%      | 32,484      | 5.7%        | 3.6%        | 2.0%      | 29,363      | 6.6%        | 4.3%        | 2.4%      | 31,110      | 7.6%        | 5.0%        | 2.7%      |
| Enrollment: Graduate/Professional            | 12,235      | 5.3%        | 2.9%        | 2.4%      | 4,920       | 4.1%        | 1.9%        | 2.2%      | 4,595       | 3.9%        | 2.0%        | 1.9%      | 4,850       | 4.3%        | 2.7%        | 1.5%      |
| <b>Wayne State University</b>                |             |             |             |           |             |             |             |           |             |             |             |           |             |             |             |           |
| Enrollment: Undergraduate                    | 23,410      | 27.7%       | 15.3%       | 12.4%     | 13,339      | 26.7%       | 17.4%       | 9.3%      | 11,132      | 26.0%       | 17.0%       | 9.0%      | 10,145      | 24.6%       | 16.9%       | 7.7%      |
| Enrollment: Graduate/Professional            | 9,574       | 13.3%       | 8.3%        | 5.0%      | 4,172       | 11.2%       | 7.4%        | 3.8%      | 3,907       | 9.7%        | 6.4%        | 3.3%      | 5,344       | 11.2%       | 7.4%        | 3.8%      |

| Institution                                  | 1995        |             |             |           | 2000        |             |             |           | 2005        |             |             |           | 2010        |             |             |           |
|----------------------------------------------|-------------|-------------|-------------|-----------|-------------|-------------|-------------|-----------|-------------|-------------|-------------|-----------|-------------|-------------|-------------|-----------|
|                                              | Grand Total | Black Total | Black Women | Black Men | Grand Total | Black Total | Black Women | Black Men | Grand Total | Black Total | Black Women | Black Men | Grand Total | Black Total | Black Women | Black Men |
| <b>LOUISIANA</b>                             |             |             |             |           |             |             |             |           |             |             |             |           |             |             |             |           |
| <b>Louisiana State Univ.</b>                 |             |             |             |           |             |             |             |           |             |             |             |           |             |             |             |           |
| Enrollment: Undergraduate                    | 16,425      | 8.3%        | 5.1%        | 3.3%      | 23,268      | 9.3%        | 5.9%        | 3.4%      | 23,633      | 8.7%        | 5.3%        | 3.3%      | 21,999      | 9.0%        | 5.2%        | 3.8%      |
| Enrollment: Graduate/Professional            | 4,006       | 6.1%        | 4.0%        | 2.1%      | 3,631       | 6.3%        | 4.3%        | 2.0%      | 4,409       | 7.6%        | 5.2%        | 2.3%      | 4,508       | 6.5%        | 4.5%        | 2.1%      |
| <b>Southern Univ. and A &amp; M College</b>  |             |             |             |           |             |             |             |           |             |             |             |           |             |             |             |           |
| Enrollment: Undergraduate                    | 8,055       | 97.3%       | 55.7%       | 41.6%     | 6,978       | 97.5%       | 55.8%       | 41.7%     | 7,931       | 93.5%       | 56.6%       | 36.9%     | 5,091       | 96.0%       | 58.1%       | 37.9%     |
| Enrollment: Graduate/Professional            | 658         | 73.7%       | 48.3%       | 25.4%     | 773         | 72.7%       | 49.7%       | 23.0%     | 654         | 83.6%       | 62.7%       | 20.9%     | 521         | 83.1%       | 59.1%       | 24.0%     |
| <b>Northwestern State Univ. of Louisiana</b> |             |             |             |           |             |             |             |           |             |             |             |           |             |             |             |           |
| Enrollment: Undergraduate                    | 6,185       | 24.2%       | 15.6%       | 8.6%      | 6,435       | 25.4%       | 16.1%       | 9.3%      | 6,441       | 33.8%       | 22.1%       | 11.7%     | 5,305       | 31.6%       | 21.2%       | 10.4%     |
| Enrollment: Graduate/Professional            | 215         | 14.0%       | 8.8%        | 5.1%      | 258         | 20.9%       | 14.3%       | 6.6%      | 245         | 32.2%       | 23.3%       | 9.0%      | 247         | 23.9%       | 18.6%       | 5.3%      |
| <b>MARYLAND</b>                              |             |             |             |           |             |             |             |           |             |             |             |           |             |             |             |           |
| <b>Univ. of Maryland, College Park</b>       |             |             |             |           |             |             |             |           |             |             |             |           |             |             |             |           |
| Enrollment: Undergraduate                    | 20,344      | 13.1%       | 7.4%        | 5.6%      | 21,951      | 13.6%       | 8.0%        | 5.6%      | 23,199      | 12.3%       | 7.0%        | 5.3%      | 24,749      | 11.6%       | 6.5%        | 5.2%      |
| Enrollment: Graduate/Professional            | 4,115       | 7.6%        | 5.2%        | 2.4%      | 4,966       | 6.3%        | 4.1%        | 2.2%      | 6,642       | 6.0%        | 3.8%        | 2.2%      | 7,095       | 5.8%        | 3.6%        | 2.2%      |
| <b>Morgan State Univ.</b>                    |             |             |             |           |             |             |             |           |             |             |             |           |             |             |             |           |
| Enrollment: Undergraduate                    | 4,473       | 95.4%       | 56.9%       | 38.5%     | 4,827       | 91.7%       | 54.4%       | 37.3%     | 5,091       | 92.3%       | 52.2%       | 40.1%     | 5,874       | 87.1%       | 49.6%       | 37.5%     |
| Enrollment: Graduate/Professional            | 153         | 69.9%       | 39.9%       | 30.1%     | 282         | 69.9%       | 36.9%       | 33.0%     | 359         | 65.5%       | 36.8%       | 28.7%     | 623         | 73.8%       | 48.2%       | 25.7%     |
| <b>Univ. of Maryland, Baltimore County</b>   |             |             |             |           |             |             |             |           |             |             |             |           |             |             |             |           |
| Enrollment: Undergraduate                    | 6,271       | 16.4%       | 9.8%        | 6.6%      | 7,267       | 15.9%       | 9.6%        | 6.3%      | 7,955       | 13.5%       | 7.8%        | 5.7%      | 8,810       | 16.4%       | 8.9%        | 7.5%      |
| Enrollment: Graduate/Professional            | 611         | 7.0%        | 4.1%        | 2.9%      | 765         | 15.3%       | 11.6%       | 3.7%      | 881         | 10.1%       | 6.5%        | 3.6%      | 1,140       | 8.0%        | 5.1%        | 2.9%      |
| <b>MICHIGAN</b>                              |             |             |             |           |             |             |             |           |             |             |             |           |             |             |             |           |
| <b>Univ. of Michigan, Ann Arbor</b>          |             |             |             |           |             |             |             |           |             |             |             |           |             |             |             |           |
| Enrollment: Undergraduate                    | 22,021      | 8.6%        | 5.3%        | 3.3%      | 22,967      | 7.7%        | 4.6%        | 3.0%      | 24,361      | 7.2%        | 4.3%        | 2.9%      | 26,096      | 4.5%        | 2.6%        | 1.9%      |
| Enrollment: Graduate/Professional            | 11,213      | 7.3%        | 4.3%        | 3.0%      | 11,252      | 5.8%        | 3.2%        | 2.6%      | 12,622      | 5.9%        | 3.5%        | 2.4%      | 13,279      | 3.8%        | 2.5%        | 1.4%      |
| <b>Michigan State Univ.</b>                  |             |             |             |           |             |             |             |           |             |             |             |           |             |             |             |           |
| Enrollment: Undergraduate                    | 26,931      | 8.2%        | 5.1%        | 3.1%      | 29,940      | 8.8%        | 5.6%        | 3.2%      | 32,018      | 8.6%        | 5.5%        | 3.1%      | 32,720      | 7.3%        | 4.7%        | 2.7%      |
| Enrollment: Graduate/Professional            | 4,971       | 6.5%        | 3.8%        | 2.7%      | 5,721       | 5.7%        | 3.8%        | 1.8%      | 6,940       | 4.7%        | 3.2%        | 1.6%      | 8,222       | 4.2%        | 2.7%        | 1.5%      |
| <b>Wayne State University</b>                |             |             |             |           |             |             |             |           |             |             |             |           |             |             |             |           |
| Enrollment: Undergraduate                    | 8,698       | 23.5%       | 17.2%       | 6.3%      | 8,959       | 22.7%       | 16.1%       | 6.6%      | 11,763      | 28.9%       | 19.1%       | 9.8%      | 13,378      | 27.8%       | 18.9%       | 8.9%      |
| Enrollment: Graduate/Professional            | 5,642       | 11.3%       | 7.2%        | 4.0%      | 4,924       | 11.8%       | 8.3%        | 3.5%      | 5,916       | 12.8%       | 9.7%        | 3.2%      | 5,934       | 10.2%       | 7.5%        | 2.6%      |

| Institution                                  | 2015           |                |                |              |
|----------------------------------------------|----------------|----------------|----------------|--------------|
|                                              | Grand<br>Total | Black<br>Total | Black<br>Women | Black<br>Men |
| <b>LOUISIANA</b>                             |                |                |                |              |
| <b>Louisiana State Univ.</b>                 |                |                |                |              |
| Enrollment: Undergraduate                    | 23,450         | 12.1%          | 7.5%           | 4.6%         |
| Enrollment: Graduate/Professional            | 4,236          | 8.6%           | 5.7%           | 2.9%         |
| <b>Southern Univ. and A &amp; M College</b>  |                |                |                |              |
| Enrollment: Undergraduate                    | 4,631          | 93.5%          | 59.9%          | 33.6%        |
| Enrollment: Graduate/Professional            | 632            | 71.2%          | 52.1%          | 19.1%        |
| <b>Northwestern State Univ. of Louisiana</b> |                |                |                |              |
| Enrollment: Undergraduate                    | 5,016          | 30.4%          | 20.0%          | 10.5%        |
| Enrollment: Graduate/Professional            | 193            | 19.7%          | 11.9%          | 7.8%         |
| <b>MARYLAND</b>                              |                |                |                |              |
| <b>Univ. of Maryland, College Park</b>       |                |                |                |              |
| Enrollment: Undergraduate                    | 25,272         | 12.7%          | 7.1%           | 5.6%         |
| Enrollment: Graduate/Professional            | 8,091          | 6.1%           | 3.7%           | 2.5%         |
| <b>Morgan State Univ.</b>                    |                |                |                |              |
| Enrollment: Undergraduate                    | 5,589          | 82.4%          | 46.6%          | 35.8%        |
| Enrollment: Graduate/Professional            | 1,003          | 61.0%          | 41.1%          | 19.9%        |
| <b>Univ. of Maryland, Baltimore County</b>   |                |                |                |              |
| Enrollment: Undergraduate                    | 9,577          | 17.1%          | 9.2%           | 7.9%         |
| Enrollment: Graduate/Professional            | 1,160          | 9.1%           | 4.8%           | 4.2%         |
| <b>MICHIGAN</b>                              |                |                |                |              |
| <b>Univ. of Michigan, Ann Arbor</b>          |                |                |                |              |
| Enrollment: Undergraduate                    | 27,161         | 4.3%           | 2.6%           | 1.8%         |
| Enrollment: Graduate/Professional            | 13,856         | 3.9%           | 2.3%           | 1.6%         |
| <b>Michigan State Univ.</b>                  |                |                |                |              |
| Enrollment: Undergraduate                    | 35,425         | 7.2%           | 4.5%           | 2.7%         |
| Enrollment: Graduate/Professional            | 8,381          | 4.6%           | 2.9%           | 1.6%         |
| <b>Wayne State University</b>                |                |                |                |              |
| Enrollment: Undergraduate                    | 11,617         | 15.8%          | 10.2%          | 5.5%         |
| Enrollment: Graduate/Professional            | 6,066          | 7.6%           | 5.7%           | 1.9%         |

| Institution                          | 1976        |             |             |           | 1980        |             |             |           | 1984        |             |             |           | 1990        |             |             |           |
|--------------------------------------|-------------|-------------|-------------|-----------|-------------|-------------|-------------|-----------|-------------|-------------|-------------|-----------|-------------|-------------|-------------|-----------|
|                                      | Grand Total | Black Total | Black Women | Black Men | Grand Total | Black Total | Black Women | Black Men | Grand Total | Black Total | Black Women | Black Men | Grand Total | Black Total | Black Women | Black Men |
| <b>MISSISSIPPI</b>                   |             |             |             |           |             |             |             |           |             |             |             |           |             |             |             |           |
| <b>Univ. of Mississippi</b>          |             |             |             |           |             |             |             |           |             |             |             |           |             |             |             |           |
| Enrollment: Undergraduate            | 6,973       | 6.2%        | 3.5%        | 2.7%      | 7309        | 7.1%        | 4.3%        | 2.9%      | 6560        | 6.2%        | 3.4%        | 2.8%      | 8062        | 7.2%        | 4.4%        | 2.8%      |
| Enrollment: Graduate/Professional    | 1,505       | 5.9%        | 2.7%        | 3.2%      | 844         | 4.9%        | 2.3%        | 2.6%      | 729         | 3.8%        | 2.3%        | 1.5%      | 1140        | 9.4%        | 6.5%        | 2.9%      |
| <b>Jackson State Univ.</b>           |             |             |             |           |             |             |             |           |             |             |             |           |             |             |             |           |
| Enrollment: Undergraduate            | 6,203       | 95.4%       | 48.5%       | 46.9%     | 4727        | 95.0%       | 54.7%       | 40.2%     | 4507        | 97.4%       | 54.1%       | 43.3%     | 5372        | 97.5%       | 56.9%       | 40.6%     |
| Enrollment: Graduate/Professional    | 1,135       | 91.5%       | 55.6%       | 35.9%     | 364         | 81.3%       | 51.1%       | 30.2%     | 375         | 72.0%       | 41.3%       | 30.7%     | 348         | 60.6%       | 45.4%       | 15.2%     |
| <b>Univ. of Southern Mississippi</b> |             |             |             |           |             |             |             |           |             |             |             |           |             |             |             |           |
| Enrollment: Undergraduate            | 9,069       | 10.0%       | 6.5%        | 3.5%      | 8073        | 11.6%       | 7.3%        | 4.3%      | 8936        | 14.3%       | 9.2%        | 5.1%      | 9554        | 15.7%       | 10.2%       | 5.5%      |
| Enrollment: Graduate/Professional    | 2,569       | 10.5%       | 6.5%        | 4.0%      | 771         | 8.7%        | 4.9%        | 3.8%      | 874         | 7.6%        | 5.3%        | 2.3%      | 969         | 5.4%        | 3.7%        | 1.7%      |
| <b>MISSOURI</b>                      |             |             |             |           |             |             |             |           |             |             |             |           |             |             |             |           |
| <b>Univ. of Missouri</b>             |             |             |             |           |             |             |             |           |             |             |             |           |             |             |             |           |
| Enrollment: Undergraduate            | 17,704      | 2.9%        | 1.6%        | 1.3%      | 17418       | 3.7%        | 2.1%        | 1.6%      | 16639       | 3.7%        | 2.1%        | 1.6%      | 17136       | 4.3%        | 2.6%        | 1.8%      |
| Enrollment: Graduate/Professional    | 6,153       | 2.2%        | 0.9%        | 1.2%      | 3199        | 2.7%        | 1.6%        | 1.1%      | 2903        | 3.3%        | 1.6%        | 1.7%      | 3385        | 4.4%        | 2.5%        | 1.9%      |
| <b>Lincoln Univ. of Missouri</b>     |             |             |             |           |             |             |             |           |             |             |             |           |             |             |             |           |
| Enrollment: Undergraduate            | 2,098       | 39.1%       | 19.1%       | 20.0%     | 1679        | 50.7%       | 21.3%       | 29.4%     | 1695        | 50.1%       | 25.0%       | 25.1%     | 1794        | 35.6%       | 19.1%       | 16.5%     |
| Enrollment: Graduate/Professional    | 243         | 18.1%       | 8.2%        | 9.9%      | 37          | 18.9%       | 5.4%        | 13.5%     | 43          | 37.2%       | 9.3%        | 27.9%     | 23          | 34.8%       | 26.1%       | 8.7%      |
| <b>Univ. of Missouri St. Louis</b>   |             |             |             |           |             |             |             |           |             |             |             |           |             |             |             |           |
| Enrollment: Undergraduate            | 10,187      | 12.6%       | 6.6%        | 6.1%      | 5906        | 10.7%       | 6.5%        | 4.2%      | 5107        | 9.2%        | 5.9%        | 3.2%      | 5515        | 9.1%        | 6.1%        | 3.0%      |
| Enrollment: Graduate/Professional    | 1,419       | 8.8%        | 6.2%        | 2.6%      | 263         | 3.8%        | 2.7%        | 1.1%      | 312         | 3.2%        | 2.6%        | 0.6%      | 480         | 5.0%        | 3.1%        | 1.9%      |
| <b>NEW JERSEY</b>                    |             |             |             |           |             |             |             |           |             |             |             |           |             |             |             |           |
| <b>Rutgers Univ.-New Brunswick</b>   |             |             |             |           |             |             |             |           |             |             |             |           |             |             |             |           |
| Enrollment: Undergraduate            | 17,883      | 8.2%        | 4.9%        | 3.3%      | 20,959      | 10.5%       | 6.2%        | 4.4%      | 21,343      | 8.8%        | 5.4%        | 3.4%      | 21,364      | 9.6%        | 6.4%        | 3.2%      |
| Enrollment: Graduate/Professional    | 9,056       | 6.9%        | 4.3%        | 2.6%      | 2,355       | 4.6%        | 2.9%        | 1.7%      | 2,202       | 3.5%        | 2.0%        | 1.5%      | 2,713       | 3.6%        | 2.2%        | 1.4%      |
| <b>Kean Univ.</b>                    |             |             |             |           |             |             |             |           |             |             |             |           |             |             |             |           |
| Enrollment: Undergraduate            | 8,734       | 13.6%       | 8.6%        | 5.1%      | 5,671       | 12.2%       | 8.1%        | 4.1%      | 5,570       | 11.7%       | 7.2%        | 4.5%      | 6,167       | 14.9%       | 8.8%        | 6.0%      |
| Enrollment: Graduate/Professional    | 1,355       | 7.7%        | 5.9%        | 1.8%      | 121         | 15.7%       | 8.3%        | 7.4%      | 108         | 12.0%       | 12.0%       | 0.0%      | 191         | 10.5%       | 6.3%        | 4.2%      |
| <b>Rutgers Univ.-Newark</b>          |             |             |             |           |             |             |             |           |             |             |             |           |             |             |             |           |
| Enrollment: Undergraduate            | 3,754       | 13.7%       | 8.8%        | 5.0%      | 4,065       | 20.7%       | 14.5%       | 6.2%      | 3,736       | 18.7%       | 12.2%       | 6.5%      | 3,759       | 19.6%       | 13.1%       | 6.5%      |
| Enrollment: Graduate/Professional    | 2,849       | 8.9%        | 3.8%        | 5.1%      | 1,129       | 13.5%       | 7.7%        | 5.8%      | 1,038       | 11.8%       | 6.1%        | 5.7%      | 1,352       | 9.3%        | 4.7%        | 4.6%      |



| Institution                          | 1995        |             |             |           | 2000        |             |             |           | 2005        |             |             |           | 2010        |             |             |           |
|--------------------------------------|-------------|-------------|-------------|-----------|-------------|-------------|-------------|-----------|-------------|-------------|-------------|-----------|-------------|-------------|-------------|-----------|
|                                      | Grand Total | Black Total | Black Women | Black Men | Grand Total | Black Total | Black Women | Black Men | Grand Total | Black Total | Black Women | Black Men | Grand Total | Black Total | Black Women | Black Men |
| <b>MISSISSIPPI</b>                   |             |             |             |           |             |             |             |           |             |             |             |           |             |             |             |           |
| <b>Univ. of Mississippi</b>          |             |             |             |           |             |             |             |           |             |             |             |           |             |             |             |           |
| Enrollment: Undergraduate            | 7220        | 9.2%        | 5.5%        | 3.7%      | 8750        | 11.7%       | 7.1%        | 4.6%      | 11098       | 12.8%       | 8.2%        | 4.6%      | 12971       | 16.3%       | 10.4%       | 5.9%      |
| Enrollment: Graduate/Professional    | 1493        | 9.2%        | 5.8%        | 3.4%      | 1662        | 11.1%       | 7.2%        | 3.9%      | 1849        | 11.6%       | 8.5%        | 3.1%      | 2148        | 8.8%        | 6.1%        | 2.7%      |
| <b>Jackson State Univ.</b>           |             |             |             |           |             |             |             |           |             |             |             |           |             |             |             |           |
| Enrollment: Undergraduate            | 4766        | 97.0%       | 54.7%       | 42.3%     | 4809        | 98.1%       | 58.1%       | 40.0%     | 5720        | 96.1%       | 60.3%       | 35.8%     | 5670        | 94.6%       | 57.5%       | 37.0%     |
| Enrollment: Graduate/Professional    | 362         | 77.1%       | 53.3%       | 23.8%     | 613         | 82.1%       | 57.3%       | 24.8%     | 729         | 80.0%       | 57.1%       | 22.9%     | 890         | 83.4%       | 60.3%       | 23.0%     |
| <b>Univ. of Southern Mississippi</b> |             |             |             |           |             |             |             |           |             |             |             |           |             |             |             |           |
| Enrollment: Undergraduate            | 9095        | 20.8%       | 13.7%       | 7.1%      | 10328       | 23.2%       | 15.9%       | 7.3%      | 10727       | 28.1%       | 18.7%       | 9.4%      | 11016       | 29.8%       | 20.0%       | 9.8%      |
| Enrollment: Graduate/Professional    | 1257        | 8.0%        | 5.2%        | 2.9%      | 979         | 8.0%        | 5.5%        | 2.5%      | 1330        | 14.1%       | 10.4%       | 3.7%      | 1461        | 14.9%       | 11.7%       | 3.1%      |
| <b>MISSOURI</b>                      |             |             |             |           |             |             |             |           |             |             |             |           |             |             |             |           |
| <b>Univ. of Missouri</b>             |             |             |             |           |             |             |             |           |             |             |             |           |             |             |             |           |
| Enrollment: Undergraduate            | 15016       | 5.8%        | 3.5%        | 2.3%      | 16977       | 6.0%        | 4.0%        | 2.1%      | 19933       | 6.0%        | 3.6%        | 2.4%      | 23369       | 7.3%        | 4.3%        | 3.0%      |
| Enrollment: Graduate/Professional    | 3161        | 5.9%        | 3.4%        | 2.5%      | 3332        | 5.2%        | 3.6%        | 1.6%      | 3726        | 4.0%        | 2.3%        | 1.7%      | 4819        | 3.3%        | 1.8%        | 1.4%      |
| <b>Lincoln Univ. of Missouri</b>     |             |             |             |           |             |             |             |           |             |             |             |           |             |             |             |           |
| Enrollment: Undergraduate            | 1772        | 36.5%       | 19.5%       | 17.0%     | 2046        | 43.5%       | 22.7%       | 20.7%     | 2000        | 53.9%       | 28.7%       | 25.2%     | 2129        | 49.6%       | 25.6%       | 24.0%     |
| Enrollment: Graduate/Professional    | 33          | 33.3%       | 24.2%       | 9.1%      | 29          | 34.5%       | 24.1%       | 10.3%     | 79          | 21.5%       | 19.0%       | 2.5%      | 52          | 36.5%       | 19.2%       | 17.3%     |
| <b>Univ. of Missouri St. Louis</b>   |             |             |             |           |             |             |             |           |             |             |             |           |             |             |             |           |
| Enrollment: Undergraduate            | 4942        | 11.9%       | 8.4%        | 3.5%      | 5402        | 10.5%       | 7.4%        | 3.1%      | 5750        | 13.9%       | 10.3%       | 3.6%      | 5908        | 17.4%       | 12.6%       | 4.8%      |
| Enrollment: Graduate/Professional    | 522         | 8.8%        | 7.1%        | 1.7%      | 612         | 6.9%        | 5.4%        | 1.5%      | 824         | 8.5%        | 6.7%        | 1.8%      | 1123        | 7.1%        | 5.3%        | 1.8%      |
| <b>NEW JERSEY</b>                    |             |             |             |           |             |             |             |           |             |             |             |           |             |             |             |           |
| <b>Rutgers Univ.-New Brunswick</b>   |             |             |             |           |             |             |             |           |             |             |             |           |             |             |             |           |
| Enrollment: Undergraduate            | 21,887      | 8.1%        | 5.1%        | 3.0%      | 25,057      | 8.1%        | 5.1%        | 2.9%      | 24,242      | 8.8%        | 5.3%        | 3.5%      | 28,829      | 7.6%        | 4.6%        | 3.0%      |
| Enrollment: Graduate/Professional    | 2,743       | 5.4%        | 3.9%        | 1.5%      | 2,795       | 4.0%        | 2.7%        | 1.4%      | 3,864       | 5.8%        | 4.4%        | 1.3%      | 4,951       | 7.4%        | 5.9%        | 1.6%      |
| <b>Kean Univ.</b>                    |             |             |             |           |             |             |             |           |             |             |             |           |             |             |             |           |
| Enrollment: Undergraduate            | 6,316       | 17.2%       | 9.8%        | 7.4%      | 6,442       | 19.0%       | 12.5%       | 6.5%      | 7,515       | 20.0%       | 12.4%       | 7.6%      | 10,046      | 18.8%       | 11.6%       | 7.2%      |
| Enrollment: Graduate/Professional    | 173         | 12.1%       | 10.4%       | 1.7%      | 387         | 14.5%       | 11.4%       | 3.1%      | 613         | 20.6%       | 16.0%       | 4.6%      | 853         | 18.6%       | 14.5%       | 4.1%      |
| <b>Rutgers Univ.-Newark</b>          |             |             |             |           |             |             |             |           |             |             |             |           |             |             |             |           |
| Enrollment: Undergraduate            | 4,044       | 21.7%       | 14.0%       | 7.7%      | 4,076       | 17.2%       | 11.5%       | 5.8%      | 4,894       | 19.1%       | 12.6%       | 6.5%      | 5,859       | 18.1%       | 11.3%       | 6.8%      |
| Enrollment: Graduate/Professional    | 1,189       | 10.0%       | 6.1%        | 3.9%      | 1,215       | 9.7%        | 6.2%        | 3.5%      | 1,396       | 11.3%       | 6.4%        | 4.9%      | 1,812       | 11.4%       | 7.1%        | 4.4%      |

| Institution                          | 2015           |                |                |              |
|--------------------------------------|----------------|----------------|----------------|--------------|
|                                      | Grand<br>Total | Black<br>Total | Black<br>Women | Black<br>Men |
| <b>MISSISSIPPI</b>                   |                |                |                |              |
| <b>Univ. of Mississippi</b>          |                |                |                |              |
| Enrollment: Undergraduate            | 17120          | 13.4%          | 8.6%           | 4.7%         |
| Enrollment: Graduate/Professional    | 3270           | 9.6%           | 6.7%           | 2.8%         |
| <b>Jackson State Univ.</b>           |                |                |                |              |
| Enrollment: Undergraduate            | 6676           | 91.5%          | 58.1%          | 33.4%        |
| Enrollment: Graduate/Professional    | 870            | 79.3%          | 58.0%          | 21.3%        |
| <b>Univ. of Southern Mississippi</b> |                |                |                |              |
| Enrollment: Undergraduate            | 10297          | 30.3%          | 20.7%          | 9.6%         |
| Enrollment: Graduate/Professional    | 1435           | 12.2%          | 9.1%           | 3.1%         |
| <b>MISSOURI</b>                      |                |                |                |              |
| <b>Univ. of Missouri</b>             |                |                |                |              |
| Enrollment: Undergraduate            | 25909          | 8.2%           | 5.0%           | 3.2%         |
| Enrollment: Graduate/Professional    | 4963           | 3.3%           | 1.9%           | 1.5%         |
| <b>Lincoln Univ. of Missouri</b>     |                |                |                |              |
| Enrollment: Undergraduate            | 1911           | 57.5%          | 28.7%          | 28.8%        |
| Enrollment: Graduate/Professional    | 53             | 22.6%          | 11.3%          | 11.3%        |
| <b>Univ. of Missouri St. Louis</b>   |                |                |                |              |
| Enrollment: Undergraduate            | 5541           | 15.6%          | 11.0%          | 4.6%         |
| Enrollment: Graduate/Professional    | 1001           | 9.3%           | 7.0%           | 2.3%         |
| <b>NEW JERSEY</b>                    |                |                |                |              |
| <b>Rutgers Univ.-New Brunswick</b>   |                |                |                |              |
| Enrollment: Undergraduate            | 33,294         | 7.3%           | 4.5%           | 2.8%         |
| Enrollment: Graduate/Professional    | 8,737          | 7.9%           | 6.0%           | 2.0%         |
| <b>Kean Univ.</b>                    |                |                |                |              |
| Enrollment: Undergraduate            | 9,191          | 19.9%          | 12.0%          | 7.9%         |
| Enrollment: Graduate/Professional    | 853            | 20.0%          | 14.8%          | 5.3%         |
| <b>Rutgers Univ.-Newark</b>          |                |                |                |              |
| Enrollment: Undergraduate            | 6,206          | 18.5%          | 11.2%          | 7.2%         |
| Enrollment: Graduate/Professional    | 1,805          | 10.0%          | 5.8%           | 4.2%         |

| Institution                                   | 1976        |             |             |           | 1980        |             |             |           | 1984        |             |             |           | 1990        |             |             |           |
|-----------------------------------------------|-------------|-------------|-------------|-----------|-------------|-------------|-------------|-----------|-------------|-------------|-------------|-----------|-------------|-------------|-------------|-----------|
|                                               | Grand Total | Black Total | Black Women | Black Men | Grand Total | Black Total | Black Women | Black Men | Grand Total | Black Total | Black Women | Black Men | Grand Total | Black Total | Black Women | Black Men |
| <b>NEW YORK</b>                               |             |             |             |           |             |             |             |           |             |             |             |           |             |             |             |           |
| <b>SUNY Albany</b>                            |             |             |             |           |             |             |             |           |             |             |             |           |             |             |             |           |
| Enrollment: Undergraduate                     | 9,321       | 4.3%        | 2.2%        | 2.1%      | 9,922       | 4.7%        | 2.6%        | 2.1%      | 9,970       | 5.6%        | 3.4%        | 2.2%      | 10,576      | 9.8%        | 5.9%        | 3.8%      |
| Enrollment: Graduate/Professional             | 3,458       | 2.3%        | 0.9%        | 1.4%      | 1,659       | 2.7%        | 1.9%        | 0.8%      | 1,624       | 1.8%        | 0.9%        | 1.0%      | 1,988       | 5.7%        | 3.5%        | 2.2%      |
| <b>CUNY, Medgar Evers College</b>             |             |             |             |           |             |             |             |           |             |             |             |           |             |             |             |           |
| Enrollment: Undergraduate                     | 2,806       | 82.9%       | 60.9%       | 22.0%     | 1,226       | 86.4%       | 59.2%       | 27.2%     | 1,434       | 87.2%       | 60.6%       | 26.6%     | 1,638       | 87.5%       | 61.9%       | 25.6%     |
| Enrollment: Graduate/Professional             |             | 0.0%        | 0.0%        | 0.0%      | -           | -           | -           | -         | -           | -           | -           | -         | -           | -           | -           | -         |
| <b>CUNY, City College</b>                     |             |             |             |           |             |             |             |           |             |             |             |           |             |             |             |           |
| Enrollment: Undergraduate                     | 11,918      | 32.7%       | 17.0%       | 15.7%     | 8,072       | 37.2%       | 19.2%       | 18.0%     | 7,753       | 32.9%       | 17.7%       | 15.2%     | 7,250       | 33.9%       | 17.0%       | 16.9%     |
| Enrollment: Graduate/Professional             | 1,663       | 22.5%       | 15.6%       | 6.9%      | 326         | 31.6%       | 20.6%       | 11.0%     | 337         | 12.8%       | 7.1%        | 5.6%      | 291         | 16.5%       | 9.3%        | 7.2%      |
| <b>NORTH CAROLINA</b>                         |             |             |             |           |             |             |             |           |             |             |             |           |             |             |             |           |
| <b>Univ. of North Carolina at Chapel Hill</b> |             |             |             |           |             |             |             |           |             |             |             |           |             |             |             |           |
| Enrollment: Undergraduate                     | 13,170      | 6.1%        | 3.4%        | 2.7%      | 13,827      | 8.5%        | 5.4%        | 3.1%      | 13,719      | 9.8%        | 6.5%        | 3.2%      | 14,468      | 10.3%       | 6.9%        | 3.4%      |
| Enrollment: Graduate/Professional             | 5,534       | 6.4%        | 3.1%        | 3.3%      | 4,266       | 7.6%        | 4.0%        | 3.6%      | 4,356       | 5.9%        | 3.2%        | 2.7%      | 4,781       | 6.5%        | 4.0%        | 2.5%      |
| <b>North Carolina A &amp; T State Univ.</b>   |             |             |             |           |             |             |             |           |             |             |             |           |             |             |             |           |
| Enrollment: Undergraduate                     | 4,754       | 95.1%       | 47.6%       | 47.5%     | 4,318       | 91.2%       | 42.4%       | 48.8%     | 4,278       | 88.5%       | 39.9%       | 48.6%     | 4,851       | 93.3%       | 47.0%       | 46.4%     |
| Enrollment: Graduate/Professional             | 671         | 69.6%       | 37.3%       | 32.3%     | 119         | 62.2%       | 24.4%       | 37.8%     | 180         | 52.8%       | 23.3%       | 29.4%     | 196         | 53.6%       | 26.5%       | 27.0%     |
| <b>Univ. of North Carolina at Charlotte</b>   |             |             |             |           |             |             |             |           |             |             |             |           |             |             |             |           |
| Enrollment: Undergraduate                     | 5,909       | 5.7%        | 3.0%        | 2.6%      | 6,105       | 7.7%        | 4.9%        | 2.8%      | 6,913       | 8.2%        | 5.1%        | 3.2%      | 9,592       | 11.7%       | 7.6%        | 4.2%      |
| Enrollment: Graduate/Professional             | 1,225       | 15.0%       | 11.1%       | 3.9%      | 142         | 6.3%        | 3.5%        | 2.8%      | 160         | 6.9%        | 4.4%        | 2.5%      | 355         | 3.4%        | 2.8%        | 0.6%      |
| <b>OHIO</b>                                   |             |             |             |           |             |             |             |           |             |             |             |           |             |             |             |           |
| <b>The Ohio State Univ.</b>                   |             |             |             |           |             |             |             |           |             |             |             |           |             |             |             |           |
| Enrollment: Undergraduate                     | 38,408      | 6.3%        | 3.6%        | 2.7%      | 37,871      | 5.1%        | 3.0%        | 2.1%      | 34,335      | 4.7%        | 2.7%        | 2.1%      | 34,347      | 5.4%        | 3.3%        | 2.1%      |
| Enrollment: Graduate/Professional             | 11,574      | 4.5%        | 2.7%        | 1.9%      | 9,139       | 4.5%        | 2.6%        | 1.9%      | 8,604       | 3.7%        | 2.2%        | 1.4%      | 7,962       | 5.0%        | 2.9%        | 2.1%      |
| <b>Central State Univ.</b>                    |             |             |             |           |             |             |             |           |             |             |             |           |             |             |             |           |
| Enrollment: Undergraduate                     | 1,849       | 91.9%       | 43.2%       | 48.7%     | 2,523       | 92.6%       | 43.4%       | 49.2%     | 1,923       | 78.2%       | 34.2%       | 44.0%     | 2,395       | 90.6%       | 48.4%       | 42.3%     |
| Enrollment: Graduate/Professional             |             | 0.0%        | 0.0%        | 0.0%      | -           | -           | -           | -         | -           | -           | -           | -         | -           | -           | -           | -         |
| <b>Cleveland State Univ.</b>                  |             |             |             |           |             |             |             |           |             |             |             |           |             |             |             |           |
| Enrollment: Undergraduate                     | 12,446      | 12.2%       | 7.1%        | 5.1%      | 8,680       | 18.4%       | 10.0%       | 8.4%      | 8,202       | 12.1%       | 7.7%        | 4.4%      | 8,830       | 13.9%       | 8.9%        | 5.0%      |
| Enrollment: Graduate/Professional             | 3,914       | 11.4%       | 6.0%        | 5.4%      | 923         | 5.5%        | 2.9%        | 2.6%      | 842         | 4.9%        | 2.6%        | 2.3%      | 1,137       | 4.7%        | 2.8%        | 1.8%      |

| Institution                                   | 1995        |             |             |           | 2000        |             |             |           | 2005        |             |             |           | 2010        |             |             |           |
|-----------------------------------------------|-------------|-------------|-------------|-----------|-------------|-------------|-------------|-----------|-------------|-------------|-------------|-----------|-------------|-------------|-------------|-----------|
|                                               | Grand Total | Black Total | Black Women | Black Men | Grand Total | Black Total | Black Women | Black Men | Grand Total | Black Total | Black Women | Black Men | Grand Total | Black Total | Black Women | Black Men |
| <b>NEW YORK</b>                               |             |             |             |           |             |             |             |           |             |             |             |           |             |             |             |           |
| <b>SUNY Albany</b>                            |             |             |             |           |             |             |             |           |             |             |             |           |             |             |             |           |
| Enrollment: Undergraduate                     | 9,586       | 8.7%        | 5.2%        | 3.5%      | 10,667      | 9.0%        | 5.4%        | 3.5%      | 11,125      | 8.2%        | 4.9%        | 3.4%      | 12,038      | 10.0%       | 5.8%        | 4.2%      |
| Enrollment: Graduate/Professional             | 1,956       | 6.0%        | 3.5%        | 2.5%      | 1,965       | 6.7%        | 4.6%        | 2.1%      | 2,244       | 7.1%        | 5.0%        | 2.1%      | 2,279       | 5.0%        | 3.8%        | 1.1%      |
| <b>CUNY, Medgar Evers College</b>             |             |             |             |           |             |             |             |           |             |             |             |           |             |             |             |           |
| Enrollment: Undergraduate                     | 3,018       | 89.6%       | 70.2%       | 19.4%     | 2,350       | 84.6%       | 64.5%       | 20.0%     | 3,133       | 83.8%       | 62.7%       | 21.2%     | 4,537       | 84.8%       | 61.6%       | 23.2%     |
| Enrollment: Graduate/Professional             | -           | -           | -           | -         | -           | -           | -           | -         | -           | -           | -           | -         | -           | -           | -           | -         |
| <b>CUNY, City College</b>                     |             |             |             |           |             |             |             |           |             |             |             |           |             |             |             |           |
| Enrollment: Undergraduate                     | 7,190       | 34.9%       | 19.6%       | 15.3%     | 5,187       | 33.9%       | 18.6%       | 15.3%     | 6,691       | 23.1%       | 12.9%       | 10.1%     | 9,255       | 20.2%       | 11.6%       | 8.6%      |
| Enrollment: Graduate/Professional             | 284         | 20.8%       | 13.7%       | 7.0%      | 316         | 14.6%       | 9.2%        | 5.4%      | 221         | 10.9%       | 5.9%        | 5.0%      | 450         | 17.1%       | 11.3%       | 5.8%      |
| <b>NORTH CAROLINA</b>                         |             |             |             |           |             |             |             |           |             |             |             |           |             |             |             |           |
| <b>Univ. of North Carolina at Chapel Hill</b> |             |             |             |           |             |             |             |           |             |             |             |           |             |             |             |           |
| Enrollment: Undergraduate                     | 14,714      | 10.4%       | 7.1%        | 3.3%      | 14,713      | 11.2%       | 7.7%        | 3.4%      | 15,898      | 10.8%       | 7.4%        | 3.4%      | 17,457      | 8.9%        | 5.9%        | 2.9%      |
| Enrollment: Graduate/Professional             | 5,040       | 8.6%        | 5.5%        | 3.1%      | 6,069       | 7.4%        | 5.0%        | 2.4%      | 6,530       | 8.4%        | 5.9%        | 2.5%      | 6,815       | 6.9%        | 4.7%        | 2.2%      |
| <b>North Carolina A &amp; T State Univ.</b>   |             |             |             |           |             |             |             |           |             |             |             |           |             |             |             |           |
| Enrollment: Undergraduate                     | 6,113       | 93.1%       | 48.0%       | 45.1%     | 6,094       | 93.9%       | 50.3%       | 43.6%     | 8,820       | 93.6%       | 49.7%       | 43.9%     | 8,095       | 90.0%       | 49.1%       | 40.9%     |
| Enrollment: Graduate/Professional             | 406         | 67.5%       | 38.7%       | 28.8%     | 385         | 74.8%       | 42.9%       | 31.9%     | 619         | 71.7%       | 49.8%       | 22.0%     | 856         | 71.6%       | 46.4%       | 25.2%     |
| <b>Univ. of North Carolina at Charlotte</b>   |             |             |             |           |             |             |             |           |             |             |             |           |             |             |             |           |
| Enrollment: Undergraduate                     | 9,880       | 16.0%       | 10.5%       | 5.4%      | 10,678      | 16.2%       | 10.9%       | 5.3%      | 13,615      | 13.3%       | 8.6%        | 4.7%      | 16,853      | 15.8%       | 9.9%        | 5.9%      |
| Enrollment: Graduate/Professional             | 537         | 6.9%        | 4.7%        | 2.2%      | 781         | 9.0%        | 7.0%        | 1.9%      | 1,156       | 11.9%       | 8.0%        | 4.0%      | 1,869       | 8.9%        | 6.6%        | 2.3%      |
| <b>OHIO</b>                                   |             |             |             |           |             |             |             |           |             |             |             |           |             |             |             |           |
| <b>The Ohio State Univ.</b>                   |             |             |             |           |             |             |             |           |             |             |             |           |             |             |             |           |
| Enrollment: Undergraduate                     | 30,246      | 7.2%        | 4.3%        | 2.9%      | 30,781      | 7.8%        | 4.8%        | 2.9%      | 33,443      | 7.4%        | 4.4%        | 3.0%      | 38,300      | 6.2%        | 3.5%        | 2.7%      |
| Enrollment: Graduate/Professional             | 8,936       | 5.5%        | 3.6%        | 1.9%      | 8,493       | 4.4%        | 2.9%        | 1.5%      | 10,027      | 4.7%        | 3.2%        | 1.5%      | 9,639       | 3.8%        | 2.3%        | 1.5%      |
| <b>Central State Univ.</b>                    |             |             |             |           |             |             |             |           |             |             |             |           |             |             |             |           |
| Enrollment: Undergraduate                     | 2,199       | 94.9%       | 47.7%       | 47.2%     | 973         | 95.8%       | 52.7%       | 43.1%     | 1,450       | 87.4%       | 42.9%       | 44.6%     | 2,039       | 96.4%       | 46.0%       | 50.4%     |
| Enrollment: Graduate/Professional             | -           | -           | -           | -         | 3           | 66.7%       | 33.3%       | 33.3%     | 1           | 0.0%        | 0.0%        | 0.0%      | 2           | 100.0%      | 50.0%       | 50.0%     |
| <b>Cleveland State Univ.</b>                  |             |             |             |           |             |             |             |           |             |             |             |           |             |             |             |           |
| Enrollment: Undergraduate                     | 7,085       | 18.3%       | 12.8%       | 5.5%      | 6,574       | 19.2%       | 13.0%       | 6.2%      | 6,416       | 21.5%       | 14.7%       | 6.8%      | 8,005       | 21.0%       | 14.1%       | 6.9%      |
| Enrollment: Graduate/Professional             | 1,546       | 6.3%        | 3.8%        | 2.5%      | 1,733       | 9.2%        | 6.4%        | 2.8%      | 1,727       | 10.2%       | 8.0%        | 2.2%      | 2,201       | 8.0%        | 5.5%        | 2.6%      |

| Institution                                   | 2015           |                |                |              |
|-----------------------------------------------|----------------|----------------|----------------|--------------|
|                                               | Grand<br>Total | Black<br>Total | Black<br>Women | Black<br>Men |
| <b>NEW YORK</b>                               |                |                |                |              |
| <b>SUNY Albany</b>                            |                |                |                |              |
| Enrollment: Undergraduate                     | 12,151         | 16.6%          | 9.6%           | 7.0%         |
| Enrollment: Graduate/Professional             | 2,218          | 6.7%           | 5.2%           | 1.5%         |
| <b>CUNY, Medgar Evers College</b>             |                |                |                |              |
| Enrollment: Undergraduate                     | 4,366          | 78.0%          | 55.7%          | 22.4%        |
| Enrollment: Graduate/Professional             |                |                |                |              |
| <b>CUNY, City College</b>                     |                |                |                |              |
| Enrollment: Undergraduate                     | 9,636          | 15.3%          | 8.7%           | 6.6%         |
| Enrollment: Graduate/Professional             | 376            | 17.3%          | 8.2%           | 9.0%         |
| <b>NORTH CAROLINA</b>                         |                |                |                |              |
| <b>Univ. of North Carolina at Chapel Hill</b> |                |                |                |              |
| Enrollment: Undergraduate                     | 17,606         | 7.8%           | 5.1%           | 2.7%         |
| Enrollment: Graduate/Professional             | 6,425          | 7.0%           | 4.8%           | 2.1%         |
| <b>North Carolina A &amp; T State Univ.</b>   |                |                |                |              |
| Enrollment: Undergraduate                     | 8,376          | 85.1%          | 47.6%          | 37.5%        |
| Enrollment: Graduate/Professional             | 907            | 56.7%          | 35.9%          | 20.7%        |
| <b>Univ. of North Carolina at Charlotte</b>   |                |                |                |              |
| Enrollment: Undergraduate                     | 19,745         | 16.5%          | 9.3%           | 7.2%         |
| Enrollment: Graduate/Professional             | 2,419          | 8.8%           | 6.7%           | 2.1%         |
| <b>OHIO</b>                                   |                |                |                |              |
| <b>The Ohio State Univ.</b>                   |                |                |                |              |
| Enrollment: Undergraduate                     | 40,898         | 5.2%           | 2.9%           | 2.4%         |
| Enrollment: Graduate/Professional             | 9,861          | 4.1%           | 2.7%           | 1.5%         |
| <b>Central State Univ.</b>                    |                |                |                |              |
| Enrollment: Undergraduate                     | 1,649          | 95.3%          | 52.8%          | 42.5%        |
| Enrollment: Graduate/Professional             | -              | -              | -              | -            |
| <b>Cleveland State Univ.</b>                  |                |                |                |              |
| Enrollment: Undergraduate                     | 9,046          | 15.4%          | 10.1%          | 5.3%         |
| Enrollment: Graduate/Professional             | 2,269          | 10.1%          | 7.7%           | 2.4%         |

| Institution                                   | 1976        |             |             |           | 1980        |             |             |           | 1984        |             |             |           | 1990        |             |             |           |
|-----------------------------------------------|-------------|-------------|-------------|-----------|-------------|-------------|-------------|-----------|-------------|-------------|-------------|-----------|-------------|-------------|-------------|-----------|
|                                               | Grand Total | Black Total | Black Women | Black Men | Grand Total | Black Total | Black Women | Black Men | Grand Total | Black Total | Black Women | Black Men | Grand Total | Black Total | Black Women | Black Men |
| <b>PENNSYLVANIA</b>                           |             |             |             |           |             |             |             |           |             |             |             |           |             |             |             |           |
| <b>Pennsylvania State College, Univ. Park</b> |             |             |             |           |             |             |             |           |             |             |             |           |             |             |             |           |
| Enrollment: Undergraduate                     | 26,037      | 1.7%        | 1.0%        | 0.8%      | 26,421      | 2.4%        | 1.4%        | 1.1%      | 26,513      | 3.6%        | 2.1%        | 1.5%      | 29,437      | 3.4%        | 1.9%        | 1.4%      |
| Enrollment: Graduate/Professional             | 4,797       | 2.1%        | 0.9%        | 1.3%      | 3,584       | 2.0%        | 1.1%        | 0.9%      | 3,524       | 2.3%        | 1.4%        | 1.0%      | 4,096       | 3.1%        | 1.6%        | 1.5%      |
| <b>Lincoln Univ.</b>                          |             |             |             |           |             |             |             |           |             |             |             |           |             |             |             |           |
| Enrollment: Undergraduate                     | 1,090       | 95.6%       | 47.5%       | 48.1%     | 947         | 91.4%       | 46.5%       | 45.0%     | 973         | 93.5%       | 50.6%       | 43.0%     | 1,140       | 96.1%       | 56.1%       | 39.9%     |
| Enrollment: Graduate/Professional             |             | 0.0%        | 0.0%        | 0.0%      | 261         | 66.3%       | 41.4%       | 24.9%     | 136         | 68.4%       | 31.6%       | 36.8%     | 194         | 67.5%       | 44.8%       | 22.7%     |
| <b>Temple Univ.</b>                           |             |             |             |           |             |             |             |           |             |             |             |           |             |             |             |           |
| Enrollment: Undergraduate                     | 18,078      | 18.7%       | 11.9%       | 6.8%      | 14,247      | 18.7%       | 12.5%       | 6.3%      | 14,230      | 18.4%       | 11.6%       | 6.8%      | 14,124      | 18.0%       | 11.2%       | 6.7%      |
| Enrollment: Graduate/Professional             | 8,563       | 8.6%        | 5.2%        | 3.5%      | 6,486       | 9.0%        | 5.0%        | 4.0%      | 3,584       | 6.2%        | 3.9%        | 2.3%      | 4,076       | 9.4%        | 6.1%        | 3.3%      |
| <b>SOUTH CAROLINA</b>                         |             |             |             |           |             |             |             |           |             |             |             |           |             |             |             |           |
| <b>Univ. of South Carolina, Columbia</b>      |             |             |             |           |             |             |             |           |             |             |             |           |             |             |             |           |
| Enrollment: Undergraduate                     | 16,079      | 10.8%       | 6.4%        | 4.5%      | 15,131      | 14.4%       | 8.7%        | 5.6%      | 12,361      | 15.9%       | 10.0%       | 5.9%      | 13,538      | 14.7%       | 9.3%        | 5.4%      |
| Enrollment: Graduate/Professional             | 7,261       | 9.7%        | 6.0%        | 3.5%      | 2,429       | 5.9%        | 3.8%        | 2.1%      | 2,779       | 4.7%        | 2.7%        | 2.1%      | 4,069       | 5.8%        | 3.6%        | 2.2%      |
| <b>South Carolina State Univ.</b>             |             |             |             |           |             |             |             |           |             |             |             |           |             |             |             |           |
| Enrollment: Undergraduate                     | 2,931       | 98.7%       | 55.1%       | 43.6%     | 2,990       | 98.9%       | 53.5%       | 45.4%     | 2,982       | 98.6%       | 54.2%       | 44.4%     | 4,140       | 97.3%       | 55.9%       | 41.4%     |
| Enrollment: Graduate/Professional             | 502         | 85.3%       | 55.4%       | 29.9%     | 72          | 95.8%       | 75.0%       | 20.8%     | 166         | 83.1%       | 59.0%       | 24.1%     | 3           | 100.0%      | 33.3%       | 66.7%     |
| <b>Francis Marion Univ.</b>                   |             |             |             |           |             |             |             |           |             |             |             |           |             |             |             |           |
| Enrollment: Undergraduate                     | 2,237       | 12.8%       | 7.3%        | 5.5%      | 1,833       | 12.3%       | 8.3%        | 3.9%      | 2,336       | 12.5%       | 8.8%        | 3.8%      | 3,124       | 14.0%       | 9.2%        | 4.8%      |
| Enrollment: Graduate/Professional             | 374         | 26.7%       | 22.7%       | 4.0%      | 8           | 12.5%       | 12.5%       | 0.0%      | 4           | 0.0%        | 0.0%        | 0.0%      | -           | -           | -           | -         |
| <b>TENNESSEE</b>                              |             |             |             |           |             |             |             |           |             |             |             |           |             |             |             |           |
| <b>University of Tennessee</b>                |             |             |             |           |             |             |             |           |             |             |             |           |             |             |             |           |
| Enrollment: Undergraduate                     | 22,494      | 5.0%        | 2.8%        | 2.2%      | 19,143      | 5.9%        | 3.2%        | 2.7%      | 16,372      | 4.9%        | 2.4%        | 2.4%      | 16,272      | 5.1%        | 2.8%        | 2.3%      |
| Enrollment: Graduate/Professional             | 5,947       | 4.0%        | 2.5%        | 1.5%      | 3,367       | 4.1%        | 2.9%        | 1.2%      | 2,822       | 4.1%        | 2.6%        | 1.5%      | 3,070       | 4.5%        | 2.7%        | 1.8%      |
| <b>Tennessee State Univ.</b>                  |             |             |             |           |             |             |             |           |             |             |             |           |             |             |             |           |
| Enrollment: Undergraduate                     | 4,462       | 91.7%       | 49.5%       | 42.2%     | 4,810       | 85.0%       | 45.6%       | 39.4%     | 4,396       | 86.5%       | 48.5%       | 38.0%     | 4,350       | 79.2%       | 47.0%       | 32.2%     |
| Enrollment: Graduate/Professional             | 869         | 43.4%       | 27.5%       | 15.9%     | 95          | 50.5%       | 36.8%       | 13.7%     | 66          | 53.0%       | 25.8%       | 27.3%     | 179         | 39.1%       | 24.0%       | 15.1%     |
| <b>Middle Tennessee State Univ.</b>           |             |             |             |           |             |             |             |           |             |             |             |           |             |             |             |           |
| Enrollment: Undergraduate                     | 8,660       | 7.3%        | 3.8%        | 3.5%      | 8,246       | 9.6%        | 5.6%        | 4.1%      | 8,342       | 8.4%        | 4.7%        | 3.7%      | 11,058      | 9.3%        | 5.3%        | 3.9%      |
| Enrollment: Graduate/Professional             | 997         | 3.1%        | 1.0%        | 2.1%      | 142         | 6.3%        | 2.8%        | 3.5%      | 132         | 3.0%        | 0.8%        | 2.3%      | 170         | 7.1%        | 5.3%        | 1.8%      |

| Institution                                   | 1995        |             |             |           | 2000        |             |             |           | 2005        |             |             |           | 2010        |             |             |           |
|-----------------------------------------------|-------------|-------------|-------------|-----------|-------------|-------------|-------------|-----------|-------------|-------------|-------------|-----------|-------------|-------------|-------------|-----------|
|                                               | Grand Total | Black Total | Black Women | Black Men | Grand Total | Black Total | Black Women | Black Men | Grand Total | Black Total | Black Women | Black Men | Grand Total | Black Total | Black Women | Black Men |
| <b>PENNSYLVANIA</b>                           |             |             |             |           |             |             |             |           |             |             |             |           |             |             |             |           |
| <b>Pennsylvania State College, Univ. Park</b> |             |             |             |           |             |             |             |           |             |             |             |           |             |             |             |           |
| Enrollment: Undergraduate                     | 30,099      | 2.8%        | 1.6%        | 1.2%      | 32,530      | 4.0%        | 2.4%        | 1.6%      | 32,762      | 4.0%        | 2.3%        | 1.7%      | 36,954      | 3.9%        | 2.2%        | 1.7%      |
| Enrollment: Graduate/Professional             | 4,324       | 4.2%        | 2.1%        | 2.1%      | 4,278       | 3.7%        | 2.2%        | 1.5%      | 5,054       | 3.3%        | 2.1%        | 1.2%      | 5,759       | 3.3%        | 1.9%        | 1.4%      |
| <b>Lincoln Univ.</b>                          |             |             |             |           |             |             |             |           |             |             |             |           |             |             |             |           |
| Enrollment: Undergraduate                     | 1,240       | 96.3%       | 57.1%       | 39.2%     | 1,289       | 93.5%       | 54.0%       | 39.5%     | 1,652       | 93.4%       | 57.9%       | 35.5%     | 1,763       | 75.1%       | 44.3%       | 30.8%     |
| Enrollment: Graduate/Professional             | 186         | 76.3%       | 53.8%       | 22.6%     | 347         | 55.9%       | 33.4%       | 22.5%     | 403         | 88.6%       | 61.0%       | 27.5%     | 420         | 86.4%       | 56.9%       | 29.5%     |
| <b>Temple Univ.</b>                           |             |             |             |           |             |             |             |           |             |             |             |           |             |             |             |           |
| Enrollment: Undergraduate                     | 14,241      | 25.4%       | 16.7%       | 8.7%      | 14,897      | 23.4%       | 16.0%       | 7.5%      | 20,859      | 17.9%       | 12.3%       | 5.6%      | 24,501      | 14.1%       | 9.3%        | 4.8%      |
| Enrollment: Graduate/Professional             | 4,069       | 13.1%       | 8.9%        | 4.2%      | 4,733       | 11.6%       | 7.7%        | 4.0%      | 4,698       | 9.5%        | 6.2%        | 3.3%      | 6,680       | 7.8%        | 5.1%        | 2.7%      |
| <b>SOUTH CAROLINA</b>                         |             |             |             |           |             |             |             |           |             |             |             |           |             |             |             |           |
| <b>Univ. of South Carolina, Columbia</b>      |             |             |             |           |             |             |             |           |             |             |             |           |             |             |             |           |
| Enrollment: Undergraduate                     | 12,232      | 18.7%       | 12.1%       | 6.6%      | 12,538      | 18.4%       | 12.0%       | 6.5%      | 16,306      | 13.3%       | 8.5%        | 4.8%      | 19,725      | 10.3%       | 6.2%        | 4.0%      |
| Enrollment: Graduate/Professional             | 4,798       | 7.1%        | 5.0%        | 2.1%      | 4,663       | 9.1%        | 6.8%        | 2.3%      | 4,828       | 8.9%        | 6.7%        | 2.2%      | 5,248       | 10.1%       | 8.2%        | 1.9%      |
| <b>South Carolina State Univ.</b>             |             |             |             |           |             |             |             |           |             |             |             |           |             |             |             |           |
| Enrollment: Undergraduate                     | 3,596       | 97.9%       | 54.3%       | 43.6%     | 3,252       | 97.4%       | 53.9%       | 43.5%     | 3,556       | 98.2%       | 56.1%       | 42.0%     | 3,485       | 96.0%       | 50.7%       | 45.3%     |
| Enrollment: Graduate/Professional             | 137         | 77.4%       | 63.5%       | 13.9%     | 380         | 79.5%       | 68.9%       | 10.5%     | 226         | 87.2%       | 65.9%       | 21.2%     | 275         | 81.8%       | 62.2%       | 19.6%     |
| <b>Francis Marion Univ.</b>                   |             |             |             |           |             |             |             |           |             |             |             |           |             |             |             |           |
| Enrollment: Undergraduate                     | 2,946       | 26.1%       | 17.4%       | 8.7%      | 2,489       | 31.2%       | 21.9%       | 9.2%      | 3,010       | 42.1%       | 29.9%       | 12.2%     | 3,328       | 46.8%       | 35.1%       | 11.7%     |
| Enrollment: Graduate/Professional             | 44          | 9.1%        | 6.8%        | 2.3%      | 48          | 14.6%       | 12.5%       | 2.1%      | 45          | 22.2%       | 20.0%       | 2.2%      | 38          | 15.8%       | 15.8%       | 0.0%      |
| <b>TENNESSEE</b>                              |             |             |             |           |             |             |             |           |             |             |             |           |             |             |             |           |
| <b>University of Tennessee</b>                |             |             |             |           |             |             |             |           |             |             |             |           |             |             |             |           |
| Enrollment: Undergraduate                     | 15653       | 4.6%        | 2.4%        | 2.2%      | 17862       | 6.2%        | 3.4%        | 2.7%      | 18600       | 8.9%        | 5.2%        | 3.7%      | 20122       | 7.4%        | 4.2%        | 3.2%      |
| Enrollment: Graduate/Professional             | 3810        | 5.9%        | 3.9%        | 2.1%      | 3881        | 5.6%        | 3.8%        | 1.8%      | 5899        | 8.1%        | 6.0%        | 2.1%      | 6707        | 7.9%        | 5.8%        | 2.2%      |
| <b>Tennessee State Univ.</b>                  |             |             |             |           |             |             |             |           |             |             |             |           |             |             |             |           |
| Enrollment: Undergraduate                     | 5344        | 79.0%       | 48.1%       | 31.0%     | 6068        | 86.6%       | 53.5%       | 33.1%     | 5415        | 84.9%       | 54.8%       | 30.1%     | 5538        | 77.9%       | 47.6%       | 30.3%     |
| Enrollment: Graduate/Professional             | 346         | 51.2%       | 34.4%       | 16.8%     | 474         | 51.7%       | 38.0%       | 13.7%     | 595         | 63.9%       | 45.9%       | 18.0%     | 745         | 48.6%       | 33.0%       | 15.6%     |
| <b>Middle Tennessee State Univ.</b>           |             |             |             |           |             |             |             |           |             |             |             |           |             |             |             |           |
| Enrollment: Undergraduate                     | 12272       | 11.2%       | 6.5%        | 4.7%      | 14436       | 11.4%       | 6.5%        | 4.9%      | 17257       | 12.2%       | 7.1%        | 5.1%      | 19682       | 17.1%       | 9.8%        | 7.3%      |
| Enrollment: Graduate/Professional             | 574         | 8.0%        | 3.8%        | 4.2%      | 578         | 10.2%       | 5.7%        | 4.5%      | 690         | 11.4%       | 7.4%        | 4.1%      | 994         | 12.4%       | 7.2%        | 5.1%      |

| Institution                                   | 2015           |                |                |              |
|-----------------------------------------------|----------------|----------------|----------------|--------------|
|                                               | Grand<br>Total | Black<br>Total | Black<br>Women | Black<br>Men |
| <b>PENNSYLVANIA</b>                           |                |                |                |              |
| <b>Pennsylvania State College, Univ. Park</b> |                |                |                |              |
| Enrollment: Undergraduate                     | 39,294         | 4.2%           | 2.3%           | 1.8%         |
| Enrollment: Graduate/Professional             | 5,890          | 3.0%           | 1.7%           | 1.3%         |
| <b>Lincoln Univ.</b>                          |                |                |                |              |
| Enrollment: Undergraduate                     | 1,546          | 86.0%          | 54.6%          | 31.4%        |
| Enrollment: Graduate/Professional             | 139            | 95.0%          | 64.0%          | 30.9%        |
| <b>Temple Univ.</b>                           |                |                |                |              |
| Enrollment: Undergraduate                     | 25,128         | 12.2%          | 7.8%           | 4.4%         |
| Enrollment: Graduate/Professional             | 6,979          | 6.7%           | 4.2%           | 2.5%         |
| <b>SOUTH CAROLINA</b>                         |                |                |                |              |
| <b>Univ. of South Carolina, Columbia</b>      |                |                |                |              |
| Enrollment: Undergraduate                     | 23,328         | 9.0%           | 5.3%           | 3.7%         |
| Enrollment: Graduate/Professional             | 5,828          | 10.2%          | 7.9%           | 2.3%         |
| <b>South Carolina State Univ.</b>             |                |                |                |              |
| Enrollment: Undergraduate                     | 2,223          | 96.2%          | 48.4%          | 47.8%        |
| Enrollment: Graduate/Professional             | 200            | 87.0%          | 63.5%          | 23.5%        |
| <b>Francis Marion Univ.</b>                   |                |                |                |              |
| Enrollment: Undergraduate                     | 3,106          | 47.1%          | 36.1%          | 11.0%        |
| Enrollment: Graduate/Professional             | 102            | 15.7%          | 13.7%          | 2.0%         |
| <b>TENNESSEE</b>                              |                |                |                |              |
| <b>University of Tennessee</b>                |                |                |                |              |
| Enrollment: Undergraduate                     | 20467          | 7.0%           | 3.8%           | 3.2%         |
| Enrollment: Graduate/Professional             | 3894           | 5.4%           | 3.7%           | 1.7%         |
| <b>Tennessee State Univ.</b>                  |                |                |                |              |
| Enrollment: Undergraduate                     | 5966           | 72.0%          | 46.1%          | 25.9%        |
| Enrollment: Graduate/Professional             | 830            | 29.4%          | 19.3%          | 10.1%        |
| <b>Middle Tennessee State Univ.</b>           |                |                |                |              |
| Enrollment: Undergraduate                     | 16141          | 22.3%          | 13.7%          | 8.6%         |
| Enrollment: Graduate/Professional             | 794            | 9.4%           | 6.3%           | 3.1%         |



| Institution                       | 1976        |             |             |           | 1980        |             |             |           | 1984        |             |             |           | 1990        |             |             |           |
|-----------------------------------|-------------|-------------|-------------|-----------|-------------|-------------|-------------|-----------|-------------|-------------|-------------|-----------|-------------|-------------|-------------|-----------|
|                                   | Grand Total | Black Total | Black Women | Black Men | Grand Total | Black Total | Black Women | Black Men | Grand Total | Black Total | Black Women | Black Men | Grand Total | Black Total | Black Women | Black Men |
| <b>TEXAS</b>                      |             |             |             |           |             |             |             |           |             |             |             |           |             |             |             |           |
| <b>Univ. of Texas at Austin</b>   |             |             |             |           |             |             |             |           |             |             |             |           |             |             |             |           |
| Enrollment: Undergraduate         | 32,415      | 2.2%        | 1.2%        | 1.0%      | 31,874      | 2.6%        | 1.5%        | 1.1%      | 31,298      | 3.8%        | 2.2%        | 1.7%      | 31,601      | 4.3%        | 2.4%        | 1.9%      |
| Enrollment: Graduate/Professional | 8,972       | 1.5%        | 0.6%        | 0.9%      | 8,261       | 2.2%        | 1.0%        | 1.1%      | 9,687       | 2.5%        | 1.3%        | 1.3%      | 4,180       | 4.4%        | 2.9%        | 1.5%      |
| <b>Texas Southern Univ.</b>       |             |             |             |           |             |             |             |           |             |             |             |           |             |             |             |           |
| Enrollment: Undergraduate         | 7,754       | 84.4%       | 43.5%       | 40.9%     | 5,306       | 63.7%       | 36.5%       | 27.2%     | 5,023       | 69.4%       | 40.6%       | 28.8%     | 5,076       | 83.7%       | 52.7%       | 31.0%     |
| Enrollment: Graduate/Professional | 1,616       | 75.8%       | 44.2%       | 31.6%     | 880         | 53.0%       | 23.9%       | 29.1%     | 950         | 48.3%       | 26.4%       | 21.9%     | 1,050       | 48.6%       | 30.4%       | 18.2%     |
| <b>Univ. of Houston-Downtown</b>  |             |             |             |           |             |             |             |           |             |             |             |           |             |             |             |           |
| Enrollment: Undergraduate         | -           | -           | -           | -         | 2,097       | 34.0%       | 21.6%       | 12.4%     | 2,977       | 26.9%       | 15.9%       | 11.0%     | 3,392       | 22.8%       | 14.3%       | 8.5%      |
| Enrollment: Graduate/Professional | -           | -           | -           | -         | -           | -           | -           | -         | -           | -           | -           | -         | -           | -           | -           | -         |
| <b>VIRGINIA</b>                   |             |             |             |           |             |             |             |           |             |             |             |           |             |             |             |           |
| <b>Univ. of Virginia</b>          |             |             |             |           |             |             |             |           |             |             |             |           |             |             |             |           |
| Enrollment: Undergraduate         | 10,070      | 3.9%        | 2.0%        | 2.0%      | 10,702      | 7.0%        | 3.9%        | 3.1%      | 10,778      | 8.4%        | 5.2%        | 3.2%      | 11,154      | 11.1%       | 6.7%        | 4.4%      |
| Enrollment: Graduate/Professional | 5,067       | 2.9%        | 1.2%        | 1.7%      | 4,551       | 3.1%        | 1.4%        | 1.7%      | 4,903       | 3.6%        | 1.6%        | 2.0%      | 5,664       | 5.4%        | 2.9%        | 2.5%      |
| <b>Norfolk State Univ.</b>        |             |             |             |           |             |             |             |           |             |             |             |           |             |             |             |           |
| Enrollment: Undergraduate         | 6,599       | 95.9%       | 56.1%       | 39.8%     | 5,541       | 93.2%       | 57.6%       | 35.6%     | 5,644       | 90.8%       | 54.0%       | 36.8%     | 6,090       | 91.0%       | 55.2%       | 35.8%     |
| Enrollment: Graduate/Professional | 292         | 68.8%       | 51.0%       | 17.8%     | 159         | 54.7%       | 40.3%       | 14.5%     | 180         | 43.3%       | 32.2%       | 11.1%     | 168         | 40.5%       | 32.1%       | 8.3%      |
| <b>Old Dominion Univ.</b>         |             |             |             |           |             |             |             |           |             |             |             |           |             |             |             |           |
| Enrollment: Undergraduate         | 8,280       | 4.2%        | 2.3%        | 1.8%      | 8,027       | 8.4%        | 5.8%        | 2.6%      | 8,794       | 9.3%        | 5.8%        | 3.4%      | 9,484       | 12.1%       | 7.9%        | 4.2%      |
| Enrollment: Graduate/Professional | 1,641       | 6.6%        | 4.0%        | 2.6%      | 456         | 5.7%        | 4.2%        | 1.5%      | 509         | 5.5%        | 3.7%        | 1.8%      | 808         | 5.8%        | 3.5%        | 2.4%      |

| Institution                       | 1995        |             |             |           | 2000        |             |             |           | 2005        |             |             |           | 2010        |             |             |           |
|-----------------------------------|-------------|-------------|-------------|-----------|-------------|-------------|-------------|-----------|-------------|-------------|-------------|-----------|-------------|-------------|-------------|-----------|
|                                   | Grand Total | Black Total | Black Women | Black Men | Grand Total | Black Total | Black Women | Black Men | Grand Total | Black Total | Black Women | Black Men | Grand Total | Black Total | Black Women | Black Men |
| <b>TEXAS</b>                      |             |             |             |           |             |             |             |           |             |             |             |           |             |             |             |           |
| <b>Univ. of Texas at Austin</b>   |             |             |             |           |             |             |             |           |             |             |             |           |             |             |             |           |
| Enrollment: Undergraduate         | 29,489      | 4.5%        | 2.7%        | 1.8%      | 33,515      | 3.5%        | 2.0%        | 1.5%      | 33,063      | 4.1%        | 2.5%        | 1.6%      | 35,267      | 4.7%        | 2.9%        | 1.8%      |
| Enrollment: Graduate/Professional | 11,282      | 3.4%        | 2.1%        | 1.3%      | 10,688      | 2.3%        | 1.5%        | 0.8%      | 11,489      | 2.7%        | 1.8%        | 0.9%      | 11,154      | 2.9%        | 1.9%        | 1.1%      |
| <b>Texas Southern Univ.</b>       |             |             |             |           |             |             |             |           |             |             |             |           |             |             |             |           |
| Enrollment: Undergraduate         | 5,595       | 82.6%       | 49.6%       | 32.9%     | 4,117       | 91.6%       | 51.1%       | 40.5%     | 7,739       | 90.3%       | 53.1%       | 37.1%     | 5,828       | 89.4%       | 51.6%       | 37.9%     |
| Enrollment: Graduate/Professional | 1,052       | 60.8%       | 32.2%       | 28.6%     | 938         | 68.2%       | 42.0%       | 26.2%     | 1,294       | 59.8%       | 40.6%       | 19.2%     | 1,635       | 62.5%       | 38.8%       | 23.7%     |
| <b>Univ. of Houston-Downtown</b>  |             |             |             |           |             |             |             |           |             |             |             |           |             |             |             |           |
| Enrollment: Undergraduate         | 3,439       | 24.0%       | 16.5%       | 7.5%      | 4,398       | 28.9%       | 19.4%       | 9.5%      | 5,904       | 26.0%       | 17.8%       | 8.2%      | 6,030       | 28.3%       | 19.6%       | 8.7%      |
| Enrollment: Graduate/Professional | -           | -           | -           | -         | 3           | 0.0%        | 0.0%        | 0.0%      | 23          | 26.1%       | 17.4%       | 8.7%      | 15          | 20.0%       | 13.3%       | 6.7%      |
| <b>VIRGINIA</b>                   |             |             |             |           |             |             |             |           |             |             |             |           |             |             |             |           |
| <b>Univ. of Virginia</b>          |             |             |             |           |             |             |             |           |             |             |             |           |             |             |             |           |
| Enrollment: Undergraduate         | 11,829      | 10.5%       | 6.8%        | 3.8%      | 12,672      | 9.5%        | 5.8%        | 3.8%      | 13,151      | 9.0%        | 5.5%        | 3.5%      | 13,826      | 8.0%        | 5.3%        | 2.7%      |
| Enrollment: Graduate/Professional | 5,537       | 6.3%        | 3.6%        | 2.7%      | 5,270       | 5.2%        | 3.3%        | 1.9%      | 5,988       | 4.4%        | 2.7%        | 1.7%      | 6,155       | 4.7%        | 2.8%        | 1.9%      |
| <b>Norfolk State Univ.</b>        |             |             |             |           |             |             |             |           |             |             |             |           |             |             |             |           |
| Enrollment: Undergraduate         | 6,193       | 90.0%       | 54.5%       | 35.5%     | 4,985       | 92.3%       | 59.0%       | 33.3%     | 4,402       | 89.6%       | 54.3%       | 35.2%     | 4,977       | 88.8%       | 55.2%       | 33.6%     |
| Enrollment: Graduate/Professional | 311         | 55.0%       | 37.6%       | 17.4%     | 295         | 75.6%       | 60.7%       | 14.9%     | 362         | 74.6%       | 58.6%       | 16.0%     | 512         | 73.0%       | 56.3%       | 16.8%     |
| <b>Old Dominion Univ.</b>         |             |             |             |           |             |             |             |           |             |             |             |           |             |             |             |           |
| Enrollment: Undergraduate         | 8,126       | 18.2%       | 11.9%       | 6.3%      | 8,366       | 24.9%       | 16.7%       | 8.2%      | 10,684      | 24.1%       | 16.7%       | 7.4%      | 14,345      | 24.0%       | 14.5%       | 9.5%      |
| Enrollment: Graduate/Professional | 1,531       | 8.2%        | 5.7%        | 2.5%      | 1,479       | 10.1%       | 6.3%        | 3.8%      | 1,289       | 9.7%        | 7.3%        | 2.4%      | 1,885       | 10.4%       | 7.9%        | 2.5%      |

| Institution                       | 2015           |                |                |              |
|-----------------------------------|----------------|----------------|----------------|--------------|
|                                   | Grand<br>Total | Black<br>Total | Black<br>Women | Black<br>Men |
| <b>TEXAS</b>                      |                |                |                |              |
| <b>Univ. of Texas at Austin</b>   |                |                |                |              |
| Enrollment: Undergraduate         | 36,357         | 4.2%           | 2.6%           | 1.6%         |
| Enrollment: Graduate/Professional | 10,442         | 2.9%           | 1.9%           | 1.0%         |
| <b>Texas Southern Univ.</b>       |                |                |                |              |
| Enrollment: Undergraduate         | 5,884          | 80.1%          | 47.8%          | 32.3%        |
| Enrollment: Graduate/Professional | 1,650          | 59.9%          | 37.9%          | 22.1%        |
| <b>Univ. of Houston-Downtown</b>  |                |                |                |              |
| Enrollment: Undergraduate         | 6,640          | 20.0%          | 12.8%          | 7.2%         |
| Enrollment: Graduate/Professional | 45             | 28.9%          | 20.0%          | 8.9%         |
| <b>VIRGINIA</b>                   |                |                |                |              |
| <b>Univ. of Virginia</b>          |                |                |                |              |
| Enrollment: Undergraduate         | 15,218         | 6.1%           | 3.7%           | 2.5%         |
| Enrollment: Graduate/Professional | 5,940          | 4.2%           | 2.3%           | 1.9%         |
| <b>Norfolk State Univ.</b>        |                |                |                |              |
| Enrollment: Undergraduate         | 3,738          | 84.5%          | 51.7%          | 32.9%        |
| Enrollment: Graduate/Professional | 385            | 75.6%          | 58.4%          | 17.1%        |
| <b>Old Dominion Univ.</b>         |                |                |                |              |
| Enrollment: Undergraduate         | 15,319         | 29.0%          | 17.2%          | 11.8%        |
| Enrollment: Graduate/Professional | 1,604          | 10.5%          | 7.5%           | 2.9%         |

Table 3

*Percent Black Degree Completion by Gender from 1976 to 2015, 5-Year Intervals*

| Institution                                   | 1976        |             |             |           | 1979        |             |             |           | 1985        |             |             |           | 1990        |             |             |           |
|-----------------------------------------------|-------------|-------------|-------------|-----------|-------------|-------------|-------------|-----------|-------------|-------------|-------------|-----------|-------------|-------------|-------------|-----------|
|                                               | Grand Total | Black Total | Black Women | Black Men | Grand Total | Black Total | Black Women | Black Men | Grand Total | Black Total | Black Women | Black Men | Grand Total | Black Total | Black Women | Black Men |
| <b>ALABAMA</b>                                |             |             |             |           |             |             |             |           |             |             |             |           |             |             |             |           |
| <b>Univ. of Alabama</b>                       |             |             |             |           |             |             |             |           |             |             |             |           |             |             |             |           |
| Completion: BA/BS                             | 2,329       | 5.0%        | 3.3%        | 1.7%      | 2,409       | 7.3%        | 4.0%        | 3.2%      | 2,448       | 8.6%        | 5.2%        | 3.4%      | 2,404       | 7.8%        | 5.4%        | 2.4%      |
| Completion: Graduate/Professional             | 1,392       | 6.3%        | 4.7%        | 1.6%      | 1,211       | 5.6%        | 4.0%        | 1.7%      | 871         | 7.5%        | 4.1%        | 2.1%      | 932         | 3.3%        | 2.0%        | 1.3%      |
| <b>Alabama State Univ.</b>                    |             |             |             |           |             |             |             |           |             |             |             |           |             |             |             |           |
| Completion: BA/BS                             | 451         | 99.8%       | 67.6%       | 32.2%     | 401         | 99.8%       | 63.6%       | 36.2%     | 374         | 95.2%       | 62.8%       | 32.4%     | 216         | 97.2%       | 67.6%       | 29.6%     |
| Completion: Graduate/Professional             | 405         | 100.0%      | 75.1%       | 24.9%     | 329         | 99.7%       | 77.2%       | 22.5%     | 95          | 80.0%       | 58.9%       | 21.1%     | 79          | 72.2%       | 48.1%       | 24.1%     |
| <b>Univ. of Alabama Birmingham</b>            |             |             |             |           |             |             |             |           |             |             |             |           |             |             |             |           |
| Completion: BA/BS                             | 1,041       | 10.2%       | 6.8%        | 3.4%      | 1,180       | 13.6%       | 10.3%       | 3.2%      | 1,379       | 12.5%       | 9.4%        | 3.0%      | 1,332       | 12.9%       | 10.4%       | 2.6%      |
| Completion: Graduate/Professional             | 1,103       | 12.7%       | 11.4%       | 1.3%      | 1,231       | 11.5%       | 9.0%        | 2.4%      | 942         | 6.9%        | 5.0%        | 1.9%      | 1,102       | 5.6%        | 4.8%        | 0.8%      |
| <b>CALIFORNIA</b>                             |             |             |             |           |             |             |             |           |             |             |             |           |             |             |             |           |
| <b>Univ. of California-Berkeley</b>           |             |             |             |           |             |             |             |           |             |             |             |           |             |             |             |           |
| Completion: BA/BS                             | 5,713       | 3.4%        | 1.6%        | 1.8%      | 4,996       | 3.3%        | 1.9%        | 1.4%      | 4,556       | 2.7%        | 1.7%        | 1.1%      | 5,681       | 4.3%        | 2.2%        | 2.0%      |
| Completion: Graduate/Professional             | 3,346       | 4.0%        | 1.6%        | 2.4%      | 2,944       | 3.4%        | 1.7%        | 1.7%      | 3,085       | 2.20%       | 1.3%        | 0.9%      | 2,915       | 3.6%        | 2.0%        | 1.6%      |
| <b>Univ. of California-Los Angeles</b>        |             |             |             |           |             |             |             |           |             |             |             |           |             |             |             |           |
| Completion: BA/BS                             | 4,733       | 5.3%        | 2.9%        | 2.5%      | 4,420       | 4.2%        | 2.6%        | 1.6%      | 4,718       | 3.6%        | 2.3%        | 1.3%      | 5,105       | 5.4%        | 3.6%        | 1.8%      |
| Completion: Graduate/Professional             | 3,020       | 5.1%        | 2.9%        | 2.2%      | 2,773       | 4.0%        | 2.2%        | 1.8%      | 3,165       | 3.6%        | 1.9%        | 1.7%      | 3,119       | 3.3%        | 2.1%        | 1.2%      |
| <b>California State Univ. Dominguez Hills</b> |             |             |             |           |             |             |             |           |             |             |             |           |             |             |             |           |
| Completion: BA/BS                             | 904         | 30.0%       | 13.8%       | 16.2%     | 1,050       | 35.1%       | 19.0%       | 16.2%     | 1,164       | 30.8%       | 20.3%       | 10.5%     | 736         | 28.4%       | 19.8%       | 8.6%      |
| Completion: Graduate/Professional             | 365         | 27.1%       | 11.2%       | 15.9%     | 527         | 8.2%        | 5.3%        | 2.8%      | 396         | 17.4%       | 11.9%       | 5.6%      | 348         | 16.4%       | 11.8%       | 4.6%      |
| <b>FLORIDA</b>                                |             |             |             |           |             |             |             |           |             |             |             |           |             |             |             |           |
| <b>Univ. of Florida</b>                       |             |             |             |           |             |             |             |           |             |             |             |           |             |             |             |           |
| Completion: BA/BS                             | 4,998       | 2.5%        | 1.5%        | 1.0%      | 4,747       | 2.9%        | 1.8%        | 1.1%      | 5,332       | 2.9%        | 1.6%        | 1.3%      | 5,431       | 4.2%        | 2.4%        | 1.9%      |
| Completion: Graduate/Professional             | 2,359       | 4.3%        | 1.8%        | 2.5%      | 1,950       | 3.5%        | 1.5%        | 2.0%      | 2,007       | 3.3%        | 1.6%        | 1.7%      | 2,298       | 4.2%        | 2.5%        | 1.7%      |
| <b>Florida A &amp; M Univ.</b>                |             |             |             |           |             |             |             |           |             |             |             |           |             |             |             |           |
| Completion: BA/BS                             | 612         | 91.2%       | 46.7%       | 44.4%     | 712         | 86.4%       | 50.0%       | 36.4%     | 686         | 80.5%       | 50.3%       | 30.2%     | 624         | 75.3%       | 47.0%       | 28.4%     |
| Completion: Graduate/Professional             | 217         | 88.9%       | 59.9%       | 29.0%     | 176         | 82.4%       | 60.8%       | 21.6%     | 55          | 54.5%       | 34.5%       | 20.0%     | 84          | 81.0%       | 53.6%       | 27.4%     |
| <b>Florida Atlantic Univ.</b>                 |             |             |             |           |             |             |             |           |             |             |             |           |             |             |             |           |
| Completion: BA/BS                             | 1,419       | 4.8%        | 3.4%        | 1.4%      | 1,405       | 6.0%        | 4.7%        | 1.3%      | 1,523       | 3.2%        | 2.1%        | 1.1%      | 1,688       | 3.7%        | 2.7%        | 1.1%      |
| Completion: Graduate/Professional             | 542         | 8.1%        | 4.8%        | 3.3%      | 442         | 5.2%        | 3.6%        | 1.6%      | 349         | 3.4%        | 1.7%        | 1.7%      | 404         | 2.0%        | 1.5%        | 0.5%      |

| Institution                                   | 1995        |             |             |           | 2000        |             |             |           | 2005        |             |             |           | 2010        |             |             |           |
|-----------------------------------------------|-------------|-------------|-------------|-----------|-------------|-------------|-------------|-----------|-------------|-------------|-------------|-----------|-------------|-------------|-------------|-----------|
|                                               | Grand Total | Black Total | Black Women | Black Men | Grand Total | Black Total | Black Women | Black Men | Grand Total | Black Total | Black Women | Black Men | Grand Total | Black Total | Black Women | Black Men |
| <b>ALABAMA</b>                                |             |             |             |           |             |             |             |           |             |             |             |           |             |             |             |           |
| <b>Univ. of Alabama</b>                       |             |             |             |           |             |             |             |           |             |             |             |           |             |             |             |           |
| Completion: BA/BS                             | 2785        | 10.1%       | 7.3%        | 2.8%      | 2569        | 10.3%       | 6.9%        | 3.4%      | 2931        | 14.0%       | 9.2%        | 4.8%      | 4576        | 9.7%        | 6.3%        | 3.4%      |
| Completion: Graduate/Professional             | 1335        | 4.9%        | 3.9%        | 1.0%      | 1484        | 6.9%        | 4.9%        | 2.1%      | 1620        | 8.1%        | 6.2%        | 1.9%      | 1667        | 10.9%       | 8.9%        | 2.0%      |
| <b>Alabama State Univ.</b>                    |             |             |             |           |             |             |             |           |             |             |             |           |             |             |             |           |
| Completion: BA/BS                             | 399         | 98.7%       | 68.9%       | 29.8%     | 510         | 94.5%       | 45.3%       | 49.2%     | 520         | 95.8%       | 63.7%       | 32.1%     | 529         | 97.5%       | 64.3%       | 33.3%     |
| Completion: Graduate/Professional             | 109         | 90.8%       | 71.6%       | 19.3%     | 205         | 73.2%       | 53.2%       | 20.0%     | 284         | 69.7%       | 53.5%       | 16.2%     | 299         | 84.9%       | 65.9%       | 19.1%     |
| <b>Univ. of Alabama Birmingham</b>            |             |             |             |           |             |             |             |           |             |             |             |           |             |             |             |           |
| Completion: BA/BS                             | 1610        | 14.5%       | 10.7%       | 3.9%      | 1562        | 19.6%       | 14.0%       | 5.6%      | 1622        | 19.9%       | 16.1%       | 4.4%      | 2047        | 22.3%       | 16.9%       | 5.5%      |
| Completion: Graduate/Professional             | 1221        | 7.0%        | 4.9%        | 2.1%      | 1430        | 9.3%        | 6.5%        | 2.8%      | 1619        | 9.8%        | 7.8%        | 2.0%      | 1784        | 11.7%       | 9.1%        | 2.5%      |
| <b>CALIFORNIA</b>                             |             |             |             |           |             |             |             |           |             |             |             |           |             |             |             |           |
| <b>Univ. of California-Berkeley</b>           |             |             |             |           |             |             |             |           |             |             |             |           |             |             |             |           |
| Completion: BA/BS                             | 5,536       | 5.1%        | 3.1%        | 2.0%      | 6,169       | 4.7%        | 2.8%        | 1.8%      | 6,767       | 3.4%        | 2.0%        | 1.4%      | 7,092       | 3.4%        | 2.1%        | 1.3%      |
| Completion: Graduate/Professional             | 2,810       | 3.5%        | 2.1%        | 1.4%      | 2,732       | 2.9%        | 1.5%        | 1.5%      | 2,853       | 3.7%        | 2.2%        | 1.5%      | 3,291       | 2.6%        | 1.6%        | 1.0%      |
| <b>Univ. of California-Los Angeles</b>        |             |             |             |           |             |             |             |           |             |             |             |           |             |             |             |           |
| Completion: BA/BS                             | 5,494       | 4.5%        | 2.7%        | 1.7%      | 6,220       | 5.7%        | 3.6%        | 2.1%      | 7,336       | 3.2%        | 2.2%        | 1.0%      | 7,543       | 2.7%        | 1.7%        | 1.0%      |
| Completion: Graduate/Professional             | 3,188       | 5.2%        | 2.8%        | 2.4%      | 3,273       | 4.5%        | 2.9%        | 1.6%      | 3,770       | 3.2%        | 2.1%        | 1.1%      | 4,065       | 3.2%        | 1.8%        | 1.4%      |
| <b>California State Univ. Dominguez Hills</b> |             |             |             |           |             |             |             |           |             |             |             |           |             |             |             |           |
| Completion: BA/BS                             | 1,744       | 21.4%       | 15.8%       | 5.6%      | 1,651       | 26.8%       | 19.9%       | 6.8%      | 1,716       | 26.5%       | 19.4%       | 7.1%      | 1,453       | 23.6%       | 17.3%       | 6.3%      |
| Completion: Graduate/Professional             | 729         | 16.9%       | 13.3%       | 3.6%      | 956         | 16.9%       | 13.3%       | 3.7%      | 1,108       | 21.3%       | 16.0%       | 5.3%      | 856         | 17.1%       | 13.1%       | 4.0%      |
| <b>FLORIDA</b>                                |             |             |             |           |             |             |             |           |             |             |             |           |             |             |             |           |
| <b>Univ. of Florida</b>                       |             |             |             |           |             |             |             |           |             |             |             |           |             |             |             |           |
| Completion: BA/BS                             | 5,707       | 4.4%        | 2.8%        | 1.6%      | 7,654       | 5.7%        | 3.3%        | 2.4%      | 8,417       | 7.5%        | 4.8%        | 2.7%      | 9,301       | 8.3%        | 5.4%        | 2.9%      |
| Completion: Graduate/Professional             | 2,967       | 4.4%        | 2.6%        | 1.9%      | 3,478       | 3.7%        | 2.1%        | 1.6%      | 4,542       | 4.6%        | 3.1%        | 1.5%      | 5,878       | 3.8%        | 2.4%        | 1.4%      |
| <b>Florida A &amp; M Univ.</b>                |             |             |             |           |             |             |             |           |             |             |             |           |             |             |             |           |
| Completion: BA/BS                             | 1,409       | 86.7%       | 54.2%       | 32.5%     | 1,466       | 89.3%       | 55.9%       | 33.4%     | 1,317       | 95.8%       | 63.0%       | 32.8%     | 1,242       | 93.8%       | 57.5%       | 36.3%     |
| Completion: Graduate/Professional             | 261         | 76.2%       | 55.6%       | 20.7%     | 433         | 75.5%       | 50.3%       | 25.2%     | 483         | 81.6%       | 58.4%       | 23.2%     | 654         | 80.1%       | 56.7%       | 23.4%     |
| <b>Florida Atlantic Univ.</b>                 |             |             |             |           |             |             |             |           |             |             |             |           |             |             |             |           |
| Completion: BA/BS                             | 2,403       | 7.1%        | 4.4%        | 2.7%      | 3,194       | 11.9%       | 8.4%        | 3.4%      | 4,022       | 17.0%       | 12.4%       | 4.6%      | 4,511       | 18.4%       | 12.5%       | 6.0%      |
| Completion: Graduate/Professional             | 671         | 4.0%        | 2.7%        | 1.3%      | 770         | 7.3%        | 4.7%        | 2.6%      | 1,185       | 12.2%       | 8.4%        | 3.8%      | 1,275       | 11.8%       | 9.1%        | 2.7%      |

Table 4

*Percent Black Completion by Gender from 1976 to 201*

| Institution                                   | 2015        |             |             |           |
|-----------------------------------------------|-------------|-------------|-------------|-----------|
|                                               | Grand Total | Black Total | Black Women | Black Men |
| <b>ALABAMA</b>                                |             |             |             |           |
| <b>Univ. of Alabama</b>                       |             |             |             |           |
| Completion: BA/BS                             | 5662        | 10.7%       | 7.3%        | 3.3%      |
| Completion: Graduate/Professional             | 2195        | 12.4%       | 9.6%        | 2.8%      |
| <b>Alabama State Univ.</b>                    |             |             |             |           |
| Completion: BA/BS                             | 529         | 92.2%       | 59.9%       | 32.3%     |
| Completion: Graduate/Professional             | 177         | 63.3%       | 47.5%       | 15.8%     |
| <b>Univ. of Alabama Birmingham</b>            |             |             |             |           |
| Completion: BA/BS                             | 2165        | 23.0%       | 16.0%       | 6.9%      |
| Completion: Graduate/Professional             | 2248        | 12.9%       | 10.1%       | 2.8%      |
| <b>CALIFORNIA</b>                             |             |             |             |           |
| <b>Univ. of California-Berkeley</b>           |             |             |             |           |
| Completion: BA/BS                             | 7,647       | 1.9%        | 1.1%        | 0.8%      |
| Completion: Graduate/Professional             | 3,551       | 2.9%        | 1.5%        | 1.4%      |
| <b>Univ. of California-Los Angeles</b>        |             |             |             |           |
| Completion: BA/BS                             | 7,977       | 2.3%        | 1.5%        | 0.8%      |
| Completion: Graduate/Professional             | 4,376       | 3.0%        | 2.0%        | 1.0%      |
| <b>California State Univ. Dominguez Hills</b> |             |             |             |           |
| Completion: BA/BS                             | 2,581       | 16.3%       | 11.6%       | 4.7%      |
| Completion: Graduate/Professional             | 771         | 14.8%       | 10.5%       | 4.3%      |
| <b>FLORIDA</b>                                |             |             |             |           |
| <b>Univ. of Florida</b>                       |             |             |             |           |
| Completion: BA/BS                             | 8,393       | 7.3%        | 4.9%        | 2.5%      |
| Completion: Graduate/Professional             | 5,520       | 4.6%        | 2.9%        | 1.7%      |
| <b>Florida A &amp; M Univ.</b>                |             |             |             |           |
| Completion: BA/BS                             | 1,507       | 95.0%       | 59.6%       | 35.4%     |
| Completion: Graduate/Professional             | 584         | 79.8%       | 55.3%       | 24.5%     |
| <b>Florida Atlantic Univ.</b>                 |             |             |             |           |
| Completion: BA/BS                             | 5,473       | 11.7%       | 7.8%        | 3.9%      |
| Completion: Graduate/Professional             | 1,559       | 6.9%        | 4.8%        | 2.1%      |

| Institution                                    | 1976        |             |             |           | 1979        |             |             |           | 1985        |             |             |           | 1990        |             |             |           |
|------------------------------------------------|-------------|-------------|-------------|-----------|-------------|-------------|-------------|-----------|-------------|-------------|-------------|-----------|-------------|-------------|-------------|-----------|
|                                                | Grand Total | Black Total | Black Women | Black Men | Grand Total | Black Total | Black Women | Black Men | Grand Total | Black Total | Black Women | Black Men | Grand Total | Black Total | Black Women | Black Men |
| <b>GEORGIA</b>                                 |             |             |             |           |             |             |             |           |             |             |             |           |             |             |             |           |
| <b>Univ. of Georgia</b>                        |             |             |             |           |             |             |             |           |             |             |             |           |             |             |             |           |
| Completion: BA/BS                              | 3,777       | 2.1%        | 1.3%        | 0.7%      | 3,599       | 2.8%        | 2%          | 1.2%      | 4,075       | 3.5%        | 2.4%        | 1.1%      | 4,043       | 4.0%        | 2.7%        | 1.2%      |
| Completion: Graduate/Professional              | 2,308       | 4.5%        | 2.8%        | 1.7%      | 1,819       | 3.7%        | 1.9%        | 1.9%      | 1,935       | 2.8%        | 1.8%        | 1.0%      | 1,726       | 2.8%        | 2.0%        | 0.8%      |
| <b>Savannah State Univ.</b>                    |             |             |             |           |             |             |             |           |             |             |             |           |             |             |             |           |
| Completion: BA/BS                              | 259         | 97.7%       | 61.4%       | 36.3%     | 178         | 90.4%       | 46.6%       | 43.8%     | 184         | 76.6%       | 50.0%       | 26.6%     | 197         | 81.7%       | 51.3%       | 30.5%     |
| Completion: Graduate/Professional              | -           | -           | -           | -         | 105         | 36.2%       | 27.6%       | 8.6%      | 11          | 18.2%       | 9.1%        | 9.1%      | 23          | 60.9%       | 34.8%       | 26.1%     |
| <b>Georgia State Univ.</b>                     |             |             |             |           |             |             |             |           |             |             |             |           |             |             |             |           |
| Completion: BA/BS                              | 1,911       | 11.0%       | 4.9%        | 6.1%      | 1,853       | 11.4%       | 7.0%        | 4.4%      | 2,005       | 11.2%       | 7.9%        | 3.3%      | 2,108       | 12.1%       | 8.5%        | 3.6%      |
| Completion: Graduate/Professional              | 2,303       | 13.6%       | 8.6%        | 5.0%      | 1,965       | 13.0%       | 9.9%        | 3.1%      | 1,629       | 8.3%        | 6.2%        | 2.1%      | 1,620       | 7.3%        | 5.1%        | 2.3%      |
| <b>ILLINOIS</b>                                |             |             |             |           |             |             |             |           |             |             |             |           |             |             |             |           |
| <b>Univ. of Illinois-Urbana Champaign</b>      |             |             |             |           |             |             |             |           |             |             |             |           |             |             |             |           |
| Completion: BA/BS                              | 5,903       | 2.2%        | 1.1%        | 1.2%      | 5,466       | 1.7%        | 1.1%        | 0.6%      | 5,878       | 2.3%        | 1.3%        | 1.0%      | 6,334       | 3.3%        | 1.9%        | 1.4%      |
| Completion: Graduate/Professional              | 3,685       | 3.9%        | 2.0%        | 1.9%      | 3,188       | 3.7%        | 1.2%        | 2.6%      | 3,002       | 2.2%        | 1.3%        | 0.9%      | 3,130       | 1.7%        | 0.8%        | 0.9%      |
| <b>Chicago State Univ.</b>                     |             |             |             |           |             |             |             |           |             |             |             |           |             |             |             |           |
| Completion: BA/BS                              | 1,037       | 67.5%       | 46.0%       | 21.5%     | 741         | 74.5%       | 49.9%       | 24.6%     | 579         | 81.5%       | 52.3%       | 29.2%     | 507         | 86.8%       | 60.2%       | 26.6%     |
| Completion: Graduate/Professional              | 327         | 48.0%       | 32.1%       | 15.9%     | 438         | 47.7%       | 36.1%       | 11.6%     | 298         | 57.0%       | 41.9%       | 15.1%     | 269         | 65.1%       | 48.3%       | 16.7%     |
| <b>Southern Illinois Univ., Carbondale</b>     |             |             |             |           |             |             |             |           |             |             |             |           |             |             |             |           |
| Completion: BA/BS                              | 3,128       | 5.7%        | 2.7%        | 3.0%      | 3,756       | 5.3%        | 2.6%        | 2.7%      | 3,973       | 6.7%        | 2.5%        | 4.2%      | 4,752       | 8.2%        | 3.5%        | 4.7%      |
| Completion: Graduate/Professional              | 1,040       | 5.4%        | 3.1%        | 2.3%      | 1,098       | 5.6%        | 2.2%        | 3.5%      | 987         | 3.2%        | 2.3%        | 0.9%      | 1,063       | 4.7%        | 3.0%        | 1.7%      |
| <b>INDIANA</b>                                 |             |             |             |           |             |             |             |           |             |             |             |           |             |             |             |           |
| <b>Indiana Univ. Bloomington</b>               |             |             |             |           |             |             |             |           |             |             |             |           |             |             |             |           |
| Completion: BA/BS                              | 4,077       | 2.7%        | 1.5%        | 1.2%      | 4,108       | 3.2%        | 1.9%        | 1.3%      | 4529        | 3.3%        | 2.0%        | 1.2%      | 4879        | 2.7%        | 1.5%        | 1.2%      |
| Completion: Graduate/Professional              | 3,077       | 3.1%        | 1.7%        | 1.4%      | 2,738       | 3.2%        | 1.6%        | 1.6%      | 2381        | 2.5%        | 1.5%        | 1.0%      | 2376        | 2.5%        | 1.3%        | 1.3%      |
| <b>Indiana State Univ.</b>                     |             |             |             |           |             |             |             |           |             |             |             |           |             |             |             |           |
| Completion: BA/BS                              | 1,661       | 5.8%        | 3.4%        | 2.4%      | 1,447       | 6.8%        | 3.5%        | 3.3%      | 1789        | 6.0%        | 2.9%        | 3.1%      | 1323        | 4.7%        | 2.7%        | 2.0%      |
| Completion: Graduate/Professional              | 978         | 1.0%        | 0.5%        | 0.5%      | 687         | 3.1%        | 1.7%        | 1.3%      | 547         | 0.2%        | 0.2%        | 0.0%      | 530         | 2.1%        | 1.5%        | 0.6%      |
| <b>Indiana Univ. Purdue Univ. Indianapolis</b> |             |             |             |           |             |             |             |           |             |             |             |           |             |             |             |           |
| Completion: BA/BS                              | 1,258       | 4.8%        | 2.8%        | 2.0%      | 1,204       | 6.1%        | 4.6%        | 1.6%      | 1544        | 4.7%        | 2.8%        | 1.9%      | 1865        | 6.4%        | 4.5%        | 1.9%      |
| Completion: Graduate/Professional              | 1,273       | 4.2%        | 1.3%        | 2.8%      | 1,380       | 4.7%        | 3.8%        | 0.9%      | 1164        | 3.4%        | 2.2%        | 1.1%      | 1166        | 4.1%        | 2.7%        | 1.5%      |

| Institution                                    | 1995        |             |             |           | 2000        |             |             |           | 2005        |             |             |           | 2010        |             |             |           |
|------------------------------------------------|-------------|-------------|-------------|-----------|-------------|-------------|-------------|-----------|-------------|-------------|-------------|-----------|-------------|-------------|-------------|-----------|
|                                                | Grand Total | Black Total | Black Women | Black Men | Grand Total | Black Total | Black Women | Black Men | Grand Total | Black Total | Black Women | Black Men | Grand Total | Black Total | Black Women | Black Men |
| <b>GEORGIA</b>                                 |             |             |             |           |             |             |             |           |             |             |             |           |             |             |             |           |
| <b>Univ. of Georgia</b>                        |             |             |             |           |             |             |             |           |             |             |             |           |             |             |             |           |
| Completion: BA/BS                              | 4,714       | 4.9%        | 3.7%        | 1.2%      | 4,867       | 5.7%        | 4.0%        | 1.6%      | 6,160       | 4.7%        | 3.4%        | 1.3%      | 6,490       | 5.4%        | 3.4%        | 1.9%      |
| Completion: Graduate/Professional              | 1,905       | 4.2%        | 3.1%        | 1.1%      | 1,832       | 4.4%        | 3.5%        | 0.9%      | 2,410       | 7.6%        | 6.0%        | 1.5%      | 2,425       | 8.4%        | 5.8%        | 2.6%      |
| <b>Savannah State Univ.</b>                    |             |             |             |           |             |             |             |           |             |             |             |           |             |             |             |           |
| Completion: BA/BS                              | 299         | 88.0%       | 58.2%       | 29.8%     | 251         | 89.6%       | 60.2%       | 29.5%     | 286         | 91.6%       | 58.4%       | 33.2%     | 389         | 93.8%       | 55.8%       | 38.0%     |
| Completion: Graduate/Professional              | -           | -           | -           | -         | 51          | 80.4%       | 60.8%       | 19.6%     | 57          | 61.4%       | 54.4%       | 7.0%      | 51          | 76.5%       | 64.7%       | 11.8%     |
| <b>Georgia State Univ.</b>                     |             |             |             |           |             |             |             |           |             |             |             |           |             |             |             |           |
| Completion: BA/BS                              | 2,638       | 16.6%       | 11.8%       | 4.8%      | 2,628       | 26.6%       | 19.8%       | 6.7%      | 3,339       | 32.4%       | 24.1%       | 8.3%      | 3,890       | 27.7%       | 19.4%       | 8.4%      |
| Completion: Graduate/Professional              | 1,912       | 9.0%        | 6.6%        | 2.4%      | 2,044       | 10.8%       | 8.0%        | 2.8%      | 2,270       | 16.3%       | 12.5%       | 3.8%      | 2,413       | 17.1%       | 12.1%       | 5.0%      |
| <b>ILLINOIS</b>                                |             |             |             |           |             |             |             |           |             |             |             |           |             |             |             |           |
| <b>Univ. of Illinois-Urbana Champaign</b>      |             |             |             |           |             |             |             |           |             |             |             |           |             |             |             |           |
| Completion: BA/BS                              | 6,169       | 6.0%        | 3.3%        | 2.7%      | 6,370       | 5.2%        | 3.3%        | 1.9%      | 6,752       | 6.1%        | 4.0%        | 2.1%      | 7,422       | 6.0%        | 3.9%        | 2.1%      |
| Completion: Graduate/Professional              | 3,535       | 3.4%        | 2.0%        | 1.4%      | 3,156       | 3.8%        | 2.6%        | 1.2%      | 3,593       | 3.7%        | 2.2%        | 1.5%      | 4,140       | 4.3%        | 2.7%        | 1.6%      |
| <b>Chicago State Univ.</b>                     |             |             |             |           |             |             |             |           |             |             |             |           |             |             |             |           |
| Completion: BA/BS                              | 791         | 88.4%       | 66.2%       | 22.1%     | 844         | 89.7%       | 68.5%       | 21.2%     | 699         | 87.3%       | 64.1%       | 23.2%     | 701         | 87.6%       | 64.5%       | 23.1%     |
| Completion: Graduate/Professional              | 307         | 65.5%       | 47.6%       | 17.9%     | 259         | 61.4%       | 49.4%       | 12.0%     | 356         | 59.3%       | 44.9%       | 14.3%     | 283         | 65.0%       | 51.9%       | 13.1%     |
| <b>Southern Illinois Univ., Carbondale</b>     |             |             |             |           |             |             |             |           |             |             |             |           |             |             |             |           |
| Completion: BA/BS                              | 4,572       | 8.6%        | 3.8%        | 4.7%      | 4,429       | 13.7%       | 7.6%        | 6.2%      | 4,373       | 11.1%       | 6.1%        | 5.0%      | 4,039       | 12.7%       | 6.7%        | 6.0%      |
| Completion: Graduate/Professional              | 954         | 6.2%        | 3.4%        | 1.9%      | 1,123       | 6.3%        | 4.1%        | 2.2%      | 1,175       | 8.1%        | 5.2%        | 2.9%      | 1,312       | 8.4%        | 5.9%        | 2.5%      |
| <b>INDIANA</b>                                 |             |             |             |           |             |             |             |           |             |             |             |           |             |             |             |           |
| <b>Indiana Univ. Bloomington</b>               |             |             |             |           |             |             |             |           |             |             |             |           |             |             |             |           |
| Completion: BA/BS                              | 5076        | 3.0%        | 1.8%        | 1.1%      | 5203        | 3.2%        | 2.1%        | 1.1%      | 6069        | 2.9%        | 1.9%        | 1.1%      | 7345        | 3.4%        | 2.1%        | 1.3%      |
| Completion: Graduate/Professional              | 2473        | 3.0%        | 1.8%        | 1.2%      | 2323        | 3.5%        | 1.9%        | 1.6%      | 2466        | 4.0%        | 2.1%        | 1.8%      | 3006        | 3.5%        | 2.1%        | 1.4%      |
| <b>Indiana State Univ.</b>                     |             |             |             |           |             |             |             |           |             |             |             |           |             |             |             |           |
| Completion: BA/BS                              | 1327        | 5.9%        | 2.9%        | 2.9%      | 1385        | 5.9%        | 3.2%        | 2.7%      | 1459        | 9.0%        | 4.8%        | 4.2%      | 1406        | 8.0%        | 3.8%        | 4.1%      |
| Completion: Graduate/Professional              | 498         | 2.2%        | 1.2%        | 1.0%      | 516         | 5.0%        | 2.1%        | 2.9%      | 1912        | 8.2%        | 4.6%        | 3.6%      | 540         | 7.2%        | 5.2%        | 2.0%      |
| <b>Indiana Univ. Purdue Univ. Indianapolis</b> |             |             |             |           |             |             |             |           |             |             |             |           |             |             |             |           |
| Completion: BA/BS                              | 2129        | 5.6%        | 3.9%        | 1.7%      | 2156        | 7.6%        | 5.3%        | 2.3%      | 2713        | 8.5%        | 5.8%        | 2.7%      | 3275        | 9.2%        | 6.5%        | 2.7%      |
| Completion: Graduate/Professional              | 1222        | 3.1%        | 2.0%        | 1.1%      | 1336        | 5.2%        | 3.7%        | 1.6%      | 2124        | 5.3%        | 3.9%        | 1.5%      | 2488        | 6.4%        | 5.0%        | 1.3%      |



| Institution                                    | 2015           |                |                |              |
|------------------------------------------------|----------------|----------------|----------------|--------------|
|                                                | Grand<br>Total | Black<br>Total | Black<br>Women | Black<br>Men |
| <b>GEORGIA</b>                                 |                |                |                |              |
| <b>Univ. of Georgia</b>                        |                |                |                |              |
| Completion: BA/BS                              | 6,935          | 7.2%           | 5.2%           | 2.0%         |
| Completion: Graduate/Professional              | 2,490          | 8.9%           | 6.4%           | 2.5%         |
| <b>Savannah State Univ.</b>                    |                |                |                |              |
| Completion: BA/BS                              | 492            | 86.8%          | 53.9%          | 32.9%        |
| Completion: Graduate/Professional              | 71             | 64.8%          | 50.7%          | 14.1%        |
| <b>Georgia State Univ.</b>                     |                |                |                |              |
| Completion: BA/BS                              | 4,771          | 36.4%          | 25.1%          | 11.3%        |
| Completion: Graduate/Professional              | 2,561          | 19.6%          | 13.0%          | 6.6%         |
| <b>ILLINOIS</b>                                |                |                |                |              |
| <b>Univ. of Illinois-Urbana Champaign</b>      |                |                |                |              |
| Completion: BA/BS                              | 8,024          | 5.0%           | 3.0%           | 2.1%         |
| Completion: Graduate/Professional              | 4,390          | 3.8%           | 2.2%           | 1.6%         |
| <b>Chicago State Univ.</b>                     |                |                |                |              |
| Completion: BA/BS                              | 661            | 78.1%          | 57.5%          | 20.6%        |
| Completion: Graduate/Professional              | 286            | 48.3%          | 38.1%          | 10.1%        |
| <b>Southern Illinois Univ., Carbondale</b>     |                |                |                |              |
| Completion: BA/BS                              | 3,259          | 16.0%          | 8.6%           | 7.4%         |
| Completion: Graduate/Professional              | 1,512          | 8.7%           | 5.4%           | 3.3%         |
| <b>INDIANA</b>                                 |                |                |                |              |
| <b>Indiana Univ. Bloomington</b>               |                |                |                |              |
| Completion: BA/BS                              | 7339           | 3.6%           | 2.2%           | 1.4%         |
| Completion: Graduate/Professional              | 3280           | 3.4%           | 1.9%           | 1.5%         |
| <b>Indiana State Univ.</b>                     |                |                |                |              |
| Completion: BA/BS                              | 1784           | 11.7%          | 7.7%           | 4.0%         |
| Completion: Graduate/Professional              | 613            | 7.7%           | 5.5%           | 2.1%         |
| <b>Indiana Univ. Purdue Univ. Indianapolis</b> |                |                |                |              |
| Completion: BA/BS                              | 3922           | 8.1%           | 5.6%           | 2.5%         |
| Completion: Graduate/Professional              | 2367           | 5.8%           | 4.2%           | 1.6%         |

| Institution                                  | 1976        |             |             |           | 1979        |             |             |           | 1985        |             |             |           | 1990        |             |             |           |
|----------------------------------------------|-------------|-------------|-------------|-----------|-------------|-------------|-------------|-----------|-------------|-------------|-------------|-----------|-------------|-------------|-------------|-----------|
|                                              | Grand Total | Black Total | Black Women | Black Men | Grand Total | Black Total | Black Women | Black Men | Grand Total | Black Total | Black Women | Black Men | Grand Total | Black Total | Black Women | Black Men |
| <b>LOUISIANA</b>                             |             |             |             |           |             |             |             |           |             |             |             |           |             |             |             |           |
| <b>Louisiana State Univ.</b>                 |             |             |             |           |             |             |             |           |             |             |             |           |             |             |             |           |
| Completion: BA/BS                            | 2,892       | 2.0%        | 1.3%        | 0.7%      | 2,820       | 2.2%        | 1.6%        | 0.6%      | 3,344       | 3.3%        | 2.2%        | 1.0%      | 3,087       | 4.3%        | 2.7%        | 1.6%      |
| Completion: Graduate/Professional            | 1,386       | 4.3%        | 2.9%        | 1.4%      | 1,426       | 2.9%        | 2.2%        | 0.7%      | 1,309       | 3.1%        | 2.5%        | 0.6%      | 1,181       | 3.2%        | 2.5%        | 0.8%      |
| <b>Southern Univ. and A &amp; M College</b>  |             |             |             |           |             |             |             |           |             |             |             |           |             |             |             |           |
| Completion: BA/BS                            | 1,251       | 98.8%       | 62.1%       | 36.7%     | 978         | 92.4%       | 56.3%       | 36.1%     | 857         | 76.4%       | 44.2%       | 32.2%     | 745         | 89.3%       | 52.9%       | 36.4%     |
| Completion: Graduate/Professional            | 425         | 97.2%       | 67.8%       | 29.4%     | 353         | 92.9%       | 66.6%       | 26.3%     | 281         | 76.9%       | 50.2%       | 26.7%     | 262         | 69.1%       | 34.4%       | 34.7%     |
| <b>Northwestern State Univ. of Louisiana</b> |             |             |             |           |             |             |             |           |             |             |             |           |             |             |             |           |
| Completion: BA/BS                            | 787         | 69.1%       | 37.4%       | 31.8%     | 362         | 5.5%        | 5.0%        | 0.6%      | 546         | 25.3%       | 15.9%       | 9.3%      | 462         | 19.5%       | 11.5%       | 8.0%      |
| Completion: Graduate/Professional            | 564         | 19.9%       | 6.9%        | 12.9%     | 251         | 12.7%       | 11.2%       | 1.6%      | 163         | 19.6%       | 15.3%       | 4.3%      | 111         | 7.2%        | 6.3%        | 0.9%      |
| <b>MARYLAND</b>                              |             |             |             |           |             |             |             |           |             |             |             |           |             |             |             |           |
| <b>Univ. of Maryland, College Park</b>       |             |             |             |           |             |             |             |           |             |             |             |           |             |             |             |           |
| Completion: BA/BS                            | 5,058       | 4.3%        | 2.7%        | 1.5%      | 5,260       | 4.1%        | 2.4%        | 1.7%      | 5,151       | 5.6%        | 3.5%        | 2.2%      | 5,602       | 6.3%        | 3.9%        | 2.5%      |
| Completion: Graduate/Professional            | 1,842       | 4.3%        | 2.9%        | 1.5%      | 1,622       | 4.9%        | 3.5%        | 1.4%      | 1,406       | 5.3%        | 3.6%        | 1.7%      | 1,758       | 4.4%        | 2.8%        | 1.6%      |
| <b>Morgan State Univ.</b>                    |             |             |             |           |             |             |             |           |             |             |             |           |             |             |             |           |
| Completion: BA/BS                            | 658         | 88.6%       | 55.3%       | 33.3%     | 489         | 89.6%       | 54.4%       | 35.2%     | 460         | 85.0%       | 52.0%       | 33.0%     | 430         | 92.6%       | 57.4%       | 35.1%     |
| Completion: Graduate/Professional            | 255         | 58.8%       | 32.9%       | 25.9%     | 202         | 61.9%       | 30.2%       | 31.7%     | 138         | 57.2%       | 29.0%       | 28.3%     | 111         | 62.2%       | 31.5%       | 30.6%     |
| <b>Univ. of Maryland, Baltimore County</b>   |             |             |             |           |             |             |             |           |             |             |             |           |             |             |             |           |
| Completion: BA/BS                            | 625         | 7.8%        | 5.3%        | 2.6%      | 662         | 13.3%       | 8.6%        | 4.7%      | 982         | 7.8%        | 5.6%        | 2.2%      | 1,394       | 8.8%        | 6.1%        | 2.7%      |
| Completion: Graduate/Professional            | 15          | 0.0%        | 0.0%        | 0.0%      | 37          | 2.7%        | 2.7%        | 0.0%      | 72          | 5.6%        | 4.2%        | 1.4%      | 159         | 1.9%        | 1.3%        | 0.6%      |
| <b>MICHIGAN</b>                              |             |             |             |           |             |             |             |           |             |             |             |           |             |             |             |           |
| <b>Univ. of Michigan, Ann Arbor</b>          |             |             |             |           |             |             |             |           |             |             |             |           |             |             |             |           |
| Completion: BA/BS                            | 4,839       | 5.4%        | 3.2%        | 2.2%      | 4,856       | 4.8%        | 3.1%        | 1.7%      | 4,976       | 3.1%        | 2.0%        | 1.1%      | 5,601       | 4.0%        | 2.5%        | 1.5%      |
| Completion: Graduate/Professional            | 4,989       | 7.7%        | 4.3%        | 3.3%      | 4,685       | 6.2%        | 3.4%        | 2.8%      | 4,143       | 3.6%        | 2.2%        | 1.4%      | 4,011       | 5.4%        | 3.0%        | 2.3%      |
| <b>Michigan State Univ.</b>                  |             |             |             |           |             |             |             |           |             |             |             |           |             |             |             |           |
| Completion: BA/BS                            | 7,343       | 5.4%        | 3.2%        | 2.2%      | 6,872       | 3.9%        | 2.6%        | 1.3%      | 6,576       | 4.3%        | 2.8%        | 1.5%      | 6,987       | 4.7%        | 3.3%        | 1.4%      |
| Completion: Graduate/Professional            | 3,464       | 5.5%        | 2.2%        | 3.2%      | 2,973       | 5.2%        | 3.2%        | 2.1%      | 2,435       | 3.8%        | 1.8%        | 2.0%      | 2,453       | 3.2%        | 1.5%        | 1.8%      |
| <b>Wayne State University</b>                |             |             |             |           |             |             |             |           |             |             |             |           |             |             |             |           |
| Completion: BA/BS                            | 3,288       | 19.9%       | 11.9%       | 8.0%      | 2,893       | 21.9%       | 13.4%       | 8.6%      | 2,378       | 18.7%       | 12.4%       | 6.2%      | 2,491       | 12.9%       | 9.3%        | 3.7%      |
| Completion: Graduate/Professional            | 2,917       | 15.2%       | 10.7%       | 4.5%      | 2,477       | 16.4%       | 12.1%       | 4.2%      | 1,991       | 13.5%       | 9.9%        | 3.6%      | 2,224       | 9.4%        | 6.9%        | 2.5%      |

| Institution                                  | 1995        |             |             |           | 2000        |             |             |           | 2005        |             |             |           | 2010        |             |             |           |
|----------------------------------------------|-------------|-------------|-------------|-----------|-------------|-------------|-------------|-----------|-------------|-------------|-------------|-----------|-------------|-------------|-------------|-----------|
|                                              | Grand Total | Black Total | Black Women | Black Men | Grand Total | Black Total | Black Women | Black Men | Grand Total | Black Total | Black Women | Black Men | Grand Total | Black Total | Black Women | Black Men |
| <b>LOUISIANA</b>                             |             |             |             |           |             |             |             |           |             |             |             |           |             |             |             |           |
| <b>Louisiana State Univ.</b>                 |             |             |             |           |             |             |             |           |             |             |             |           |             |             |             |           |
| Completion: BA/BS                            | 3,149       | 4.8%        | 3.2%        | 1.6%      | 3,830       | 7.1%        | 4.9%        | 2.2%      | 4,449       | 8.2%        | 5.2%        | 3.1%      | 4,388       | 8.6%        | 5.6%        | 3.0%      |
| Completion: Graduate/Professional            | 1,539       | 4.0%        | 3.0%        | 1.0%      | 1,574       | 6.5%        | 4.6%        | 1.9%      | 1,702       | 6.0%        | 4.0%        | 2.0%      | 1,617       | 7.9%        | 5.9%        | 2.0%      |
| <b>Southern Univ. and A &amp; M College</b>  |             |             |             |           |             |             |             |           |             |             |             |           |             |             |             |           |
| Completion: BA/BS                            | 836         | 94.9%       | 59.7%       | 35.2%     | 1,062       | 96.8%       | 64.1%       | 32.7%     | 923         | 96.4%       | 64.7%       | 31.7%     | 870         | 95.5%       | 62.4%       | 33.1%     |
| Completion: Graduate/Professional            | 293         | 72.7%       | 50.2%       | 22.5%     | 375         | 80.0%       | 58.4%       | 21.6%     | 317         | 81.4%       | 59.9%       | 21.5%     | 303         | 81.5%       | 67.0%       | 14.5%     |
| <b>Northwestern State Univ. of Louisiana</b> |             |             |             |           |             |             |             |           |             |             |             |           |             |             |             |           |
| Completion: BA/BS                            | 765         | 12.7%       | 8.4%        | 4.3%      | 904         | 18.5%       | 13.5%       | 5.0%      | 1,061       | 22.5%       | 14.8%       | 7.7%      | 1,098       | 23.9%       | 16.8%       | 7.1%      |
| Completion: Graduate/Professional            | 207         | 11.6%       | 9.2%        | 2.4%      | 184         | 10.3%       | 6.5%        | 3.8%      | 243         | 16.5%       | 12.3%       | 4.1%      | 224         | 10.7%       | 8.5%        | 2.2%      |
| <b>MARYLAND</b>                              |             |             |             |           |             |             |             |           |             |             |             |           |             |             |             |           |
| <b>Univ. of Maryland, College Park</b>       |             |             |             |           |             |             |             |           |             |             |             |           |             |             |             |           |
| Completion: BA/BS                            | 4,537       | 9.9%        | 5.4%        | 4.5%      | 4,971       | 12.2%       | 7.7%        | 4.5%      | 6,263       | 10.7%       | 6.7%        | 4.0%      | 6,569       | 11.4%       | 7.0%        | 4.4%      |
| Completion: Graduate/Professional            | 2,001       | 6.3%        | 4.3%        | 2.0%      | 2,095       | 6.2%        | 4.2%        | 2.0%      | 2,470       | 6.4%        | 4.3%        | 2.2%      | 2,946       | 6.3%        | 3.9%        | 2.5%      |
| <b>Morgan State Univ.</b>                    |             |             |             |           |             |             |             |           |             |             |             |           |             |             |             |           |
| Completion: BA/BS                            | 619         | 92.4%       | 57.8%       | 34.6%     | 712         | 92.4%       | 62.8%       | 29.6%     | 833         | 88.5%       | 55.7%       | 32.8%     | 772         | 92.4%       | 53.9%       | 38.5%     |
| Completion: Graduate/Professional            | 130         | 66.9%       | 38.5%       | 28.5%     | 116         | 68.1%       | 46.6%       | 21.6%     | 121         | 66.9%       | 43.0%       | 24.0%     | 197         | 77.2%       | 46.7%       | 30.5%     |
| <b>Univ. of Maryland, Baltimore County</b>   |             |             |             |           |             |             |             |           |             |             |             |           |             |             |             |           |
| Completion: BA/BS                            | 1,553       | 11.6%       | 7.7%        | 3.9%      | 1,465       | 13.1%       | 8.7%        | 4.4%      | 1,819       | 14.6%       | 9.2%        | 5.4%      | 1,915       | 15.5%       | 9.2%        | 6.3%      |
| Completion: Graduate/Professional            | 275         | 3.6%        | 2.2%        | 1.5%      | 334         | 5.1%        | 3.3%        | 1.8%      | 456         | 15.1%       | 10.7%       | 4.4%      | 589         | 12.1%       | 7.8%        | 4.2%      |
| <b>MICHIGAN</b>                              |             |             |             |           |             |             |             |           |             |             |             |           |             |             |             |           |
| <b>Univ. of Michigan, Ann Arbor</b>          |             |             |             |           |             |             |             |           |             |             |             |           |             |             |             |           |
| Completion: BA/BS                            | 4,981       | 5.0%        | 2.9%        | 2.0%      | 5,603       | 7.3%        | 4.5%        | 2.8%      | 5,880       | 7.0%        | 4.5%        | 2.6%      | 6,457       | 5.1%        | 2.8%        | 2.3%      |
| Completion: Graduate/Professional            | 4,277       | 7.2%        | 4.2%        | 3.0%      | 4,039       | 6.3%        | 3.9%        | 2.4%      | 4,969       | 5.6%        | 3.8%        | 1.8%      | 5,130       | 4.3%        | 2.7%        | 1.7%      |
| <b>Michigan State Univ.</b>                  |             |             |             |           |             |             |             |           |             |             |             |           |             |             |             |           |
| Completion: BA/BS                            | 6,071       | 6.1%        | 4.2%        | 1.9%      | 6,897       | 6.6%        | 4.3%        | 2.2%      | 7,733       | 6.9%        | 4.6%        | 2.3%      | 8,223       | 6.6%        | 4.1%        | 2.6%      |
| Completion: Graduate/Professional            | 2,181       | 5.0%        | 2.6%        | 2.4%      | 2,652       | 5.3%        | 3.4%        | 1.8%      | 2,778       | 5.2%        | 3.6%        | 1.5%      | 2,857       | 4.3%        | 2.9%        | 1.5%      |
| <b>Wayne State University</b>                |             |             |             |           |             |             |             |           |             |             |             |           |             |             |             |           |
| Completion: BA/BS                            | 2,856       | 16.9%       | 11.8%       | 5.1%      | 2,327       | 18.3%       | 13.5%       | 4.8%      | 2,293       | 19.8%       | 15.0%       | 4.9%      | 2,489       | 18.3%       | 13.3%       | 5.0%      |
| Completion: Graduate/Professional            | 3,041       | 10.0%       | 7.4%        | 2.6%      | 3,155       | 12.9%       | 9.0%        | 3.8%      | 3,029       | 14.9%       | 11.7%       | 3.2%      | 2,748       | 14.1%       | 10.4%       | 3.7%      |

| Institution                                  | 2015           |                |                |              |
|----------------------------------------------|----------------|----------------|----------------|--------------|
|                                              | Grand<br>Total | Black<br>Total | Black<br>Women | Black<br>Men |
| <b>LOUISIANA</b>                             |                |                |                |              |
| <b>Louisiana State Univ.</b>                 |                |                |                |              |
| Completion: BA/BS                            | 4,649          | 9.6%           | 6.0%           | 3.6%         |
| Completion: Graduate/Professional            | 1,734          | 9.6%           | 6.3%           | 3.2%         |
| <b>Southern Univ. and A &amp; M College</b>  |                |                |                |              |
| Completion: BA/BS                            | 652            | 94.5%          | 61.2%          | 33.3%        |
| Completion: Graduate/Professional            | 307            | 83.7%          | 57.0%          | 26.7%        |
| <b>Northwestern State Univ. of Louisiana</b> |                |                |                |              |
| Completion: BA/BS                            | 1,069          | 26.6%          | 19.7%          | 6.8%         |
| Completion: Graduate/Professional            | 252            | 17.1%          | 13.9%          | 3.2%         |
| <b>MARYLAND</b>                              |                |                |                |              |
| <b>Univ. of Maryland, College Park</b>       |                |                |                |              |
| Completion: BA/BS                            | 7,166          | 11.2%          | 6.7%           | 4.5%         |
| Completion: Graduate/Professional            | 3,255          | 6.5%           | 3.5%           | 3.0%         |
| <b>Morgan State Univ.</b>                    |                |                |                |              |
| Completion: BA/BS                            | 931            | 87.3%          | 52.1%          | 35.2%        |
| Completion: Graduate/Professional            | 292            | 78.8%          | 48.3%          | 30.5%        |
| <b>Univ. of Maryland, Baltimore County</b>   |                |                |                |              |
| Completion: BA/BS                            | 2,432          | 16.9%          | 9.8%           | 7.0%         |
| Completion: Graduate/Professional            | 794            | 13.9%          | 7.8%           | 6.0%         |
| <b>MICHIGAN</b>                              |                |                |                |              |
| <b>Univ. of Michigan, Ann Arbor</b>          |                |                |                |              |
| Completion: BA/BS                            | 7,091          | 4.0%           | 2.7%           | 1.3%         |
| Completion: Graduate/Professional            | 5,902          | 4.0%           | 2.5%           | 1.5%         |
| <b>Michigan State Univ.</b>                  |                |                |                |              |
| Completion: BA/BS                            | 8,299          | 5.6%           | 3.7%           | 1.9%         |
| Completion: Graduate/Professional            | 3,342          | 4.5%           | 2.8%           | 1.7%         |
| <b>Wayne State University</b>                |                |                |                |              |
| Completion: BA/BS                            | 3,180          | 15.4%          | 10.8%          | 4.6%         |
| Completion: Graduate/Professional            | 2,856          | 10.9%          | 8.5%           | 2.3%         |

| Institution                          | 1976        |             |             |           | 1979        |             |             |           | 1985        |             |             |           | 1990        |             |             |           |
|--------------------------------------|-------------|-------------|-------------|-----------|-------------|-------------|-------------|-----------|-------------|-------------|-------------|-----------|-------------|-------------|-------------|-----------|
|                                      | Grand Total | Black Total | Black Women | Black Men | Grand Total | Black Total | Black Women | Black Men | Grand Total | Black Total | Black Women | Black Men | Grand Total | Black Total | Black Women | Black Men |
| <b>MISSISSIPPI</b>                   |             |             |             |           |             |             |             |           |             |             |             |           |             |             |             |           |
| <b>Univ. of Mississippi</b>          |             |             |             |           |             |             |             |           |             |             |             |           |             |             |             |           |
| Completion: BA/BS                    | 1,352       | 3.6%        | 2.1%        | 1.4%      | 1,446       | 6.2%        | 3.7%        | 2.5%      | 1479        | 5.9%        | 3.6%        | 2.3%      | 1458        | 5.1%        | 2.9%        | 2.1%      |
| Completion: Graduate/Professional    | 778         | 6.8%        | 4.4%        | 2.4%      | 680         | 5.9%        | 3.8%        | 2.1%      | 507         | 4.9%        | 3.9%        | 1.0%      | 635         | 6.9%        | 4.6%        | 2.4%      |
| <b>Jackson State Univ.</b>           |             |             |             |           |             |             |             |           |             |             |             |           |             |             |             |           |
| Completion: BA/BS                    | 669         | 95.5%       | 54.9%       | 40.7%     | 718         | 90.9%       | 58.8%       | 32.2%     | 630         | 96.7%       | 59.0%       | 37.6%     | 575         | 97.6%       | 63.1%       | 34.4%     |
| Completion: Graduate/Professional    | 393         | 91.1%       | 62.8%       | 28.2%     | 344         | 85.8%       | 59.6%       | 26.2%     | 268         | 81.7%       | 46.6%       | 35.1%     | 174         | 71.8%       | 48.9%       | 23.0%     |
| <b>Univ. of Southern Mississippi</b> |             |             |             |           |             |             |             |           |             |             |             |           |             |             |             |           |
| Completion: BA/BS                    | 1,974       | 5.8%        | 3.7%        | 2.1%      | 1,749       | 9.4%        | 6.8%        | 2.6%      | 2000        | 10.4%       | 6.7%        | 3.7%      | 2048        | 9.9%        | 6.8%        | 3.1%      |
| Completion: Graduate/Professional    | 854         | 8.1%        | 4.8%        | 3.3%      | 684         | 7.7%        | 5.7%        | 2.0%      | 677         | 8.9%        | 6.8%        | 2.1%      | 822         | 5.1%        | 3.8%        | 1.3%      |
| <b>MISSOURI</b>                      |             |             |             |           |             |             |             |           |             |             |             |           |             |             |             |           |
| <b>Univ. of Missouri</b>             |             |             |             |           |             |             |             |           |             |             |             |           |             |             |             |           |
| Completion: BA/BS                    | 3,398       | 1.2%        | 0.6%        | 0.6%      | 3,475       | 1.6%        | 1.1%        | 0.5%      | 3714        | 2.5%        | 1.6%        | 0.9%      | 3291        | 2.2%        | 1.3%        | 0.8%      |
| Completion: Graduate/Professional    | 1,741       | 1.6%        | 0.7%        | 0.9%      | 1,821       | 2.0%        | 0.9%        | 1.2%      | 1612        | 2.5%        | 1.1%        | 1.4%      | 1573        | 2.0%        | 1.1%        | 1.0%      |
| <b>Lincoln Univ. of Missouri</b>     |             |             |             |           |             |             |             |           |             |             |             |           |             |             |             |           |
| Completion: BA/BS                    | 329         | 39.2%       | 17.9%       | 21.3%     | 216         | 38.9%       | 22.2%       | 16.7%     | 243         | 47.7%       | 21.8%       | 25.9%     | 229         | 33.2%       | 18.3%       | 14.8%     |
| Completion: Graduate/Professional    | 84          | 17.9%       | 8.3%        | 9.5%      | 74          | 17.6%       | 8.1%        | 9.5%      | 48          | 18.8%       | 2.1%        | 16.7%     | 26          | 15.4%       | 11.5%       | 3.8%      |
| <b>Univ. of Missouri St. Louis</b>   |             |             |             |           |             |             |             |           |             |             |             |           |             |             |             |           |
| Completion: BA/BS                    | 1,499       | 4.2%        | 1.8%        | 2.4%      | 1,259       | 7.4%        | 4.3%        | 3.1%      | 1202        | 6.0%        | 3.7%        | 2.3%      | 1589        | 5.7%        | 3.6%        | 2.1%      |
| Completion: Graduate/Professional    | 372         | 3.2%        | 2.4%        | 0.8%      | 373         | 7.8%        | 6.4%        | 1.3%      | 393         | 3.3%        | 2.8%        | 0.5%      | 444         | 6.5%        | 5.2%        | 1.4%      |
| <b>NEW JERSEY</b>                    |             |             |             |           |             |             |             |           |             |             |             |           |             |             |             |           |
| <b>Rutgers Univ.-New Brunswick</b>   |             |             |             |           |             |             |             |           |             |             |             |           |             |             |             |           |
| Completion: BA/BS                    | 3,832       | 9.3%        | 5.0%        | 4.3%      | 4,436       | 6.1%        | 3.9%        | 2.3%      | 4,669       | 6.3%        | 4.1%        | 2.2%      | 5,415       | 7.0%        | 4.5%        | 2.5%      |
| Completion: Graduate/Professional    | 1,804       | 8.8%        | 4.9%        | 3.9%      | 1,779       | 7.2%        | 4.2%        | 3.0%      | 1,534       | 4.3%        | 2.3%        | 2.0%      | 1,595       | 2.9%        | 2.3%        | 0.6%      |
| <b>Kean Univ.</b>                    |             |             |             |           |             |             |             |           |             |             |             |           |             |             |             |           |
| Completion: BA/BS                    | 1,554       | 8.6%        | 6.6%        | 2.1%      | 1,445       | 9.3%        | 5.7%        | 3.6%      | 1,259       | 10.2%       | 6.4%        | 3.7%      | 1,274       | 7.3%        | 5.1%        | 2.2%      |
| Completion: Graduate/Professional    | 508         | 9.6%        | 6.7%        | 3.0%      | 438         | 8.9%        | 8.2%        | 0.7%      | 351         | 12.3%       | 8.0%        | 4.3%      | 270         | 9.6%        | 7.8%        | 1.9%      |
| <b>Rutgers Univ.-Newark</b>          |             |             |             |           |             |             |             |           |             |             |             |           |             |             |             |           |
| Completion: BA/BS                    | 1,095       | 17.3%       | 9.8%        | 7.5%      | 1,045       | 17.3%       | 11.2%       | 6.1%      | 836         | 16.9%       | 11.2%       | 5.6%      | 968         | 15.6%       | 10.3%       | 5.3%      |
| Completion: Graduate/Professional    | 778         | 8.4%        | 2.1%        | 6.3%      | 795         | 10.8%       | 5.0%        | 5.8%      | 769         | 10.0%       | 6.0%        | 4.0%      | 893         | 7.3%        | 3.6%        | 3.7%      |

| Institution                          | 1995        |             |             |           | 2000        |             |             |           | 2005        |             |             |           | 2010        |             |             |           |
|--------------------------------------|-------------|-------------|-------------|-----------|-------------|-------------|-------------|-----------|-------------|-------------|-------------|-----------|-------------|-------------|-------------|-----------|
|                                      | Grand Total | Black Total | Black Women | Black Men | Grand Total | Black Total | Black Women | Black Men | Grand Total | Black Total | Black Women | Black Men | Grand Total | Black Total | Black Women | Black Men |
| <b>MISSISSIPPI</b>                   |             |             |             |           |             |             |             |           |             |             |             |           |             |             |             |           |
| <b>Univ. of Mississippi</b>          |             |             |             |           |             |             |             |           |             |             |             |           |             |             |             |           |
| Completion: BA/BS                    | 1523        | 6.8%        | 4.5%        | 2.2%      | 1623        | 7.8%        | 5.2%        | 2.5%      | 2153        | 10.1%       | 6.7%        | 3.3%      | 2566        | 10.3%       | 7.2%        | 3.1%      |
| Completion: Graduate/Professional    | 748         | 8.7%        | 6.0%        | 2.7%      | 765         | 9.8%        | 7.5%        | 2.4%      | 889         | 10.2%       | 8.0%        | 2.2%      | 835         | 11.3%       | 9.3%        | 1.9%      |
| <b>Jackson State Univ.</b>           |             |             |             |           |             |             |             |           |             |             |             |           |             |             |             |           |
| Completion: BA/BS                    | 697         | 97.1%       | 59.7%       | 37.4%     | 658         | 95.9%       | 63.1%       | 32.8%     | 812         | 97.2%       | 69.6%       | 27.6%     | 982         | 94.4%       | 64.0%       | 30.4%     |
| Completion: Graduate/Professional    | 180         | 86.7%       | 65.6%       | 21.1%     | 284         | 82.4%       | 64.1%       | 18.3%     | 345         | 75.9%       | 59.1%       | 16.8%     | 465         | 84.7%       | 63.7%       | 21.1%     |
| <b>Univ. of Southern Mississippi</b> |             |             |             |           |             |             |             |           |             |             |             |           |             |             |             |           |
| Completion: BA/BS                    | 2274        | 12.1%       | 8.5%        | 3.6%      | 2473        | 18.7%       | 13.2%       | 5.5%      | 2318        | 20.0%       | 13.2%       | 6.8%      | 2555        | 21.5%       | 15.1%       | 6.4%      |
| Completion: Graduate/Professional    | 807         | 5.7%        | 4.3%        | 1.4%      | 899         | 8.8%        | 6.5%        | 2.3%      | 827         | 11.9%       | 8.9%        | 2.9%      | 868         | 15.0%       | 12.6%       | 2.4%      |
| <b>MISSOURI</b>                      |             |             |             |           |             |             |             |           |             |             |             |           |             |             |             |           |
| <b>Univ. of Missouri</b>             |             |             |             |           |             |             |             |           |             |             |             |           |             |             |             |           |
| Completion: BA/BS                    | 3447        | 3.0%        | 1.7%        | 1.3%      | 3840        | 4.9%        | 3.2%        | 1.7%      | 4259        | 4.0%        | 2.7%        | 1.3%      | 4963        | 5.4%        | 3.4%        | 2.0%      |
| Completion: Graduate/Professional    | 1557        | 2.6%        | 1.9%        | 0.6%      | 1475        | 3.7%        | 2.1%        | 1.6%      | 1757        | 3.4%        | 2.0%        | 1.4%      | 2141        | 3.5%        | 2.3%        | 1.2%      |
| <b>Lincoln Univ. of Missouri</b>     |             |             |             |           |             |             |             |           |             |             |             |           |             |             |             |           |
| Completion: BA/BS                    | 280         | 30.0%       | 19.3%       | 10.7%     | 322         | 30.7%       | 19.6%       | 11.2%     | 304         | 34.9%       | 21.7%       | 13.2%     | 273         | 35.9%       | 22.7%       | 13.2%     |
| Completion: Graduate/Professional    | 85          | 16.5%       | 9.4%        | 7.1%      | 65          | 13.8%       | 9.2%        | 4.6%      | 61          | 14.8%       | 4.9%        | 9.8%      | 45          | 20.0%       | 13.3%       | 6.7%      |
| <b>Univ. of Missouri St. Louis</b>   |             |             |             |           |             |             |             |           |             |             |             |           |             |             |             |           |
| Completion: BA/BS                    | 1680        | 6.7%        | 4.9%        | 1.7%      | 1695        | 11.0%       | 7.8%        | 3.2%      | 1902        | 11.5%       | 8.9%        | 2.6%      | 2011        | 12.7%       | 9.9%        | 2.7%      |
| Completion: Graduate/Professional    | 583         | 8.4%        | 6.0%        | 2.4%      | 589         | 12.4%       | 10.0%       | 2.4%      | 883         | 9.4%        | 7.5%        | 1.9%      | 875         | 11.1%       | 8.3%        | 2.7%      |
| <b>NEW JERSEY</b>                    |             |             |             |           |             |             |             |           |             |             |             |           |             |             |             |           |
| <b>Rutgers Univ.-New Brunswick</b>   |             |             |             |           |             |             |             |           |             |             |             |           |             |             |             |           |
| Completion: BA/BS                    | 5,028       | 7.1%        | 4.6%        | 2.5%      | 5,601       | 7.1%        | 4.5%        | 2.6%      | 5,948       | 7.8%        | 5.2%        | 2.6%      | 5,905       | 7.9%        | 4.8%        | 3.1%      |
| Completion: Graduate/Professional    | 1,765       | 4.7%        | 3.2%        | 1.5%      | 1,486       | 6.6%        | 5.5%        | 1.1%      | 2,010       | 5.3%        | 3.9%        | 1.4%      | 2,332       | 7.7%        | 6.3%        | 1.3%      |
| <b>Kean Univ.</b>                    |             |             |             |           |             |             |             |           |             |             |             |           |             |             |             |           |
| Completion: BA/BS                    | 1,536       | 11.0%       | 6.3%        | 4.7%      | 1,621       | 13.3%       | 8.9%        | 4.4%      | 1,802       | 18.3%       | 13.0%       | 5.2%      | 2,374       | 15.7%       | 10.8%       | 4.9%      |
| Completion: Graduate/Professional    | 344         | 8.7%        | 6.4%        | 2.3%      | 411         | 10.9%       | 10.0%       | 1.0%      | 635         | 15.6%       | 10.4%       | 5.2%      | 699         | 16.7%       | 12.4%       | 4.3%      |
| <b>Rutgers Univ.-Newark</b>          |             |             |             |           |             |             |             |           |             |             |             |           |             |             |             |           |
| Completion: BA/BS                    | 1,031       | 18.8%       | 12.3%       | 6.5%      | 995         | 18.5%       | 12.0%       | 6.5%      | 1,164       | 19.3%       | 14.0%       | 5.3%      | 1,361       | 18.1%       | 13.4%       | 4.7%      |
| Completion: Graduate/Professional    | 883         | 8.3%        | 3.7%        | 4.5%      | 872         | 9.1%        | 5.0%        | 4.0%      | 1,022       | 8.4%        | 5.2%        | 3.2%      | 1,307       | 10.1%       | 5.7%        | 4.4%      |

| Institution                          | 2015           |                |                |              |
|--------------------------------------|----------------|----------------|----------------|--------------|
|                                      | Grand<br>Total | Black<br>Total | Black<br>Women | Black<br>Men |
| <b>MISSISSIPPI</b>                   |                |                |                |              |
| <b>Univ. of Mississippi</b>          |                |                |                |              |
| Completion: BA/BS                    | 3659           | 13.8%          | 10.1%          | 3.7%         |
| Completion: Graduate/Professional    | 1478           | 13.4%          | 10.2%          | 3.2%         |
| <b>Jackson State Univ.</b>           |                |                |                |              |
| Completion: BA/BS                    | 989            | 88.5%          | 58.6%          | 29.8%        |
| Completion: Graduate/Professional    | 504            | 82.9%          | 61.9%          | 19.8%        |
| <b>Univ. of Southern Mississippi</b> |                |                |                |              |
| Completion: BA/BS                    | 2352           | 23.4%          | 16.7%          | 6.7%         |
| Completion: Graduate/Professional    | 943            | 10.5%          | 8.7%           | 1.8%         |
| <b>MISSOURI</b>                      |                |                |                |              |
| <b>Univ. of Missouri</b>             |                |                |                |              |
| Completion: BA/BS                    | 5995           | 6.6%           | 4.2%           | 2.4%         |
| Completion: Graduate/Professional    | 2352           | 2.8%           | 1.4%           | 1.4%         |
| <b>Lincoln Univ. of Missouri</b>     |                |                |                |              |
| Completion: BA/BS                    | 287            | 33.1%          | 19.5%          | 13.6%        |
| Completion: Graduate/Professional    | 35             | 20.0%          | 17.1%          | 2.9%         |
| <b>Univ. of Missouri St. Louis</b>   |                |                |                |              |
| Completion: BA/BS                    | 2246           | 15.3%          | 11.4%          | 4.0%         |
| Completion: Graduate/Professional    | 886            | 11.4%          | 9.0%           | 2.4%         |
| <b>NEW JERSEY</b>                    |                |                |                |              |
| <b>Rutgers Univ.-New Brunswick</b>   |                |                |                |              |
| Completion: BA/BS                    | 7,569          | 7.6%           | 4.8%           | 2.8%         |
| Completion: Graduate/Professional    | 4,033          | 9.0%           | 7.0%           | 2.0%         |
| <b>Kean Univ.</b>                    |                |                |                |              |
| Completion: BA/BS                    | 2,712          | 17.3%          | 11.3%          | 6.0%         |
| Completion: Graduate/Professional    | 621            | 18.4%          | 12.9%          | 5.5%         |
| <b>Rutgers Univ.-Newark</b>          |                |                |                |              |
| Completion: BA/BS                    | 1,544          | 17.9%          | 10.2%          | 7.6%         |
| Completion: Graduate/Professional    | 1,317          | 12.1%          | 6.5%           | 5.5%         |

| Institution                                   | 1976        |             |             |           | 1979        |             |             |           | 1985        |             |             |           | 1990        |             |             |           |
|-----------------------------------------------|-------------|-------------|-------------|-----------|-------------|-------------|-------------|-----------|-------------|-------------|-------------|-----------|-------------|-------------|-------------|-----------|
|                                               | Grand Total | Black Total | Black Women | Black Men | Grand Total | Black Total | Black Women | Black Men | Grand Total | Black Total | Black Women | Black Men | Grand Total | Black Total | Black Women | Black Men |
| <b>NEW YORK</b>                               |             |             |             |           |             |             |             |           |             |             |             |           |             |             |             |           |
| <b>SUNY Albany</b>                            |             |             |             |           |             |             |             |           |             |             |             |           |             |             |             |           |
| Completion: BA/BS                             | 2,154       | 1.8%        | 0.9%        | 0.9%      | 2,309       | 2.8%        | 1.4%        | 1.4%      | 2,317       | 2.4%        | 1.5%        | 0.9%      | 2,482       | 3.5%        | 2.2%        | 1.3%      |
| Completion: Graduate/Professional             | 1,401       | 2.4%        | 1.6%        | 0.9%      | 1,255       | 1.8%        | 1.0%        | 0.9%      | 1,132       | 2.5%        | 1.2%        | 1.2%      | 1,219       | 2.7%        | 1.6%        | 1.1%      |
| <b>CUNY, Medgar Evers College</b>             |             |             |             |           |             |             |             |           |             |             |             |           |             |             |             |           |
| Completion: BA/BS                             | 120         | 86.7%       | 44.2%       | 42.5%     | 126         | 96.8%       | 65.9%       | 31.0%     | 197         | 87.8%       | 60.9%       | 26.9%     | 155         | 0.0%        | 0.0%        | 0.0%      |
| Completion: Graduate/Professional             | -           | -           | -           | -         | -           | -           | -           | -         | -           | -           | -           | -         | -           | -           | -           | -         |
| <b>CUNY, City College</b>                     |             |             |             |           |             |             |             |           |             |             |             |           |             |             |             |           |
| Completion: BA/BS                             | 2,278       | 23.6%       | 12.6%       | 11.1%     | 1,812       | 32.9%       | 16.7%       | 16.2%     | 1,097       | 35.1%       | 13.4%       | 21.7%     | 1,248       | 0.0%        | 0.0%        | 0.0%      |
| Completion: Graduate/Professional             | 956         | 16.9%       | 11.4%       | 5.5%      | 427         | 27.4%       | 17.3%       | 10.1%     | 559         | 13.1%       | 4.7%        | 8.4%      | 669         | 0.0%        | 0.0%        | 0.0%      |
| <b>NORTH CAROLINA</b>                         |             |             |             |           |             |             |             |           |             |             |             |           |             |             |             |           |
| <b>Univ. of North Carolina at Chapel Hill</b> |             |             |             |           |             |             |             |           |             |             |             |           |             |             |             |           |
| Completion: BA/BS                             | 3,078       | 4.6%        | 2.5%        | 2.1%      | 3,173       | 4.9%        | 2.8%        | 2.1%      | 3,189       | 6.7%        | 4.4%        | 2.3%      | 3,591       | 6.1%        | 4.4%        | 1.7%      |
| Completion: Graduate/Professional             | 1,909       | 4.6%        | 2.3%        | 2.4%      | 1,863       | 5.9%        | 3.4%        | 2.5%      | 1,928       | 6.0%        | 3.4%        | 2.6%      | 2,191       | 4.7%        | 3.0%        | 1.6%      |
| <b>North Carolina A &amp; T State Univ.</b>   |             |             |             |           |             |             |             |           |             |             |             |           |             |             |             |           |
| Completion: BA/BS                             | 769         | 97.0%       | 45.4%       | 51.6%     | 662         | 90.9%       | 52.6%       | 38.4%     | 635         | 76.1%       | 33.9%       | 42.2%     | 662         | 87.3%       | 42.4%       | 44.9%     |
| Completion: Graduate/Professional             | 285         | 65.3%       | 33.7%       | 31.6%     | 273         | 63.0%       | 37.4%       | 25.6%     | 208         | 45.2%       | 25.0%       | 20.2%     | 199         | 42.2%       | 27.6%       | 14.6%     |
| <b>Univ. of North Carolina at Charlotte</b>   |             |             |             |           |             |             |             |           |             |             |             |           |             |             |             |           |
| Completion: BA/BS                             | 1,177       | 3.6%        | 1.4%        | 2.2%      | 1,302       | 4.9%        | 3.0%        | 1.9%      | 1,495       | 4.9%        | 3.3%        | 24.0%     | 1,755       | 6.4%        | 4.5%        | 1.9%      |
| Completion: Graduate/Professional             | 257         | 14.4%       | 7.4%        | 7.0%      | 420         | 18.1%       | 15.0%       | 3.1%      | 293         | 14.7%       | 12.3%       | 2.4%      | 393         | 8.7%        | 7.1%        | 1.5%      |
| <b>OHIO</b>                                   |             |             |             |           |             |             |             |           |             |             |             |           |             |             |             |           |
| <b>The Ohio State Univ.</b>                   |             |             |             |           |             |             |             |           |             |             |             |           |             |             |             |           |
| Completion: BA/BS                             | 6,418       | 2.8%        | 1.6%        | 1.2%      | 6,355       | 2.2%        | 1.5%        | 0.7%      | 6,885       | 2.5%        | 1.5%        | 0.9%      | 6,983       | 2.7%        | 1.7%        | 1.0%      |
| Completion: Graduate/Professional             | 3,841       | 4.2%        | 2.5%        | 1.7%      | 3,515       | 3.4%        | 2.2%        | 1.2%      | 3,402       | 3.7%        | 2.5%        | 1.2%      | 3,464       | 4.4%        | 2.5%        | 2.0%      |
| <b>Central State Univ.</b>                    |             |             |             |           |             |             |             |           |             |             |             |           |             |             |             |           |
| Completion: BA/BS                             | 339         | 84.4%       | 47.2%       | 37.2%     | 282         | 79.4%       | 39.0%       | 40.4%     | 207         | 82.6%       | 39.6%       | 43.0%     | 259         | 88.0%       | 52.5%       | 35.5%     |
| Completion: Graduate/Professional             | -           | -           | -           | -         | -           | -           | -           | -         | -           | -           | -           | -         | -           | -           | -           | -         |
| <b>Cleveland State Univ.</b>                  |             |             |             |           |             |             |             |           |             |             |             |           |             |             |             |           |
| Completion: BA/BS                             | 1,794       | 7.9%        | 4.2%        | 3.6%      | 1,644       | 2.9%        | 1.6%        | 1.3%      | 1,602       | 5.0%        | 3.2%        | 1.8%      | 1,613       | 7.6%        | 5.3%        | 2.4%      |
| Completion: Graduate/Professional             | 786         | 8.9%        | 5.9%        | 3.1%      | 916         | 8.4%        | 6.7%        | 1.7%      | 822         | 5.2%        | 3.9%        | 1.3%      | 1,025       | 5.7%        | 4.0%        | 1.7%      |



| Institution                                   | 1995        |             |             |           | 2000        |             |             |           | 2005        |             |             |           | 2010        |             |             |           |
|-----------------------------------------------|-------------|-------------|-------------|-----------|-------------|-------------|-------------|-----------|-------------|-------------|-------------|-----------|-------------|-------------|-------------|-----------|
|                                               | Grand Total | Black Total | Black Women | Black Men | Grand Total | Black Total | Black Women | Black Men | Grand Total | Black Total | Black Women | Black Men | Grand Total | Black Total | Black Women | Black Men |
| <b>NEW YORK</b>                               |             |             |             |           |             |             |             |           |             |             |             |           |             |             |             |           |
| <b>SUNY Albany</b>                            |             |             |             |           |             |             |             |           |             |             |             |           |             |             |             |           |
| Completion: BA/BS                             | 2,536       | 7.2%        | 4.3%        | 2.8%      | 2,391       | 8.2%        | 5.7%        | 2.4%      | 2,674       | 7.9%        | 5.0%        | 2.9%      | 2,944       | 9.1%        | 5.8%        | 3.4%      |
| Completion: Graduate/Professional             | 1,434       | 4.3%        | 2.9%        | 1.4%      | 1,345       | 4.8%        | 3.0%        | 1.8%      | 1,682       | 5.4%        | 3.3%        | 2.0%      | 1,638       | 4.7%        | 3.4%        | 1.3%      |
| <b>CUNY, Medgar Evers College</b>             |             |             |             |           |             |             |             |           |             |             |             |           |             |             |             |           |
| Completion: BA/BS                             | 191         | 90.6%       | 68.1%       | 22.5%     | 201         | 85.6%       | 66.7%       | 18.9%     | 240         | 85.0%       | 63.3%       | 21.7%     | 383         | 87.2%       | 66.6%       | 20.6%     |
| Completion: Graduate/Professional             | -           | -           | -           | -         | -           | -           | -           | -         | -           | -           | -           | -         | -           | -           | -           | -         |
| <b>CUNY, City College</b>                     |             |             |             |           |             |             |             |           |             |             |             |           |             |             |             |           |
| Completion: BA/BS                             | 1,352       | 42.2%       | 24.5%       | 17.7%     | 1,039       | 38.9%       | 25.0%       | 13.9%     | 1,184       | 34.5%       | 21.5%       | 13.1%     | 1,640       | 22.6%       | 14.0%       | 8.6%      |
| Completion: Graduate/Professional             | 992         | 25.9%       | 16.7%       | 9.2%      | 657         | 23.3%       | 15.5%       | 7.8%      | 912         | 20.4%       | 13.0%       | 7.3%      | 1,016       | 17.0%       | 11.5%       | 5.5%      |
| <b>NORTH CAROLINA</b>                         |             |             |             |           |             |             |             |           |             |             |             |           |             |             |             |           |
| <b>Univ. of North Carolina at Chapel Hill</b> |             |             |             |           |             |             |             |           |             |             |             |           |             |             |             |           |
| Completion: BA/BS                             | 3,506       | 8.2%        | 5.7%        | 2.5%      | 3,387       | 9.7%        | 7.4%        | 2.3%      | 3,888       | 10.0%       | 7.3%        | 2.7%      | 4,396       | 10.0%       | 6.6%        | 3.5%      |
| Completion: Graduate/Professional             | 2,309       | 6.6%        | 4.5%        | 2.1%      | 2,736       | 7.0%        | 5.2%        | 1.9%      | 2,916       | 8.2%        | 5.9%        | 2.3%      | 2,992       | 8.0%        | 5.9%        | 2.1%      |
| <b>North Carolina A &amp; T State Univ.</b>   |             |             |             |           |             |             |             |           |             |             |             |           |             |             |             |           |
| Completion: BA/BS                             | 977         | 87.7%       | 51.9%       | 35.8%     | 880         | 92.5%       | 52.7%       | 39.8%     | 998         | 89.8%       | 52.0%       | 37.8%     | 1,349       | 92.9%       | 54.2%       | 38.7%     |
| Completion: Graduate/Professional             | 256         | 55.9%       | 31.6%       | 24.2%     | 239         | 62.3%       | 38.1%       | 24.3%     | 313         | 62.6%       | 39.9%       | 22.7%     | 377         | 58.9%       | 38.5%       | 20.4%     |
| <b>Univ. of North Carolina at Charlotte</b>   |             |             |             |           |             |             |             |           |             |             |             |           |             |             |             |           |
| Completion: BA/BS                             | 2,491       | 10.8%       | 6.8%        | 4.0%      | 2,329       | 16.0%       | 10.4%       | 5.6%      | 2,843       | 13.7%       | 9.6%        | 4.0%      | 3,584       | 13.0%       | 8.6%        | 4.4%      |
| Completion: Graduate/Professional             | 555         | 5.9%        | 4.7%        | 1.3%      | 706         | 8.9%        | 6.2%        | 2.7%      | 839         | 10.0%       | 7.3%        | 2.7%      | 1,237       | 7.8%        | 5.8%        | 2.0%      |
| <b>OHIO</b>                                   |             |             |             |           |             |             |             |           |             |             |             |           |             |             |             |           |
| <b>The Ohio State Univ.</b>                   |             |             |             |           |             |             |             |           |             |             |             |           |             |             |             |           |
| Completion: BA/BS                             | 7,017       | 4.7%        | 3.3%        | 1.4%      | 6,746       | 5.8%        | 3.8%        | 2.0%      | 8,124       | 7.0%        | 4.5%        | 2.5%      | 9,503       | 6.2%        | 3.7%        | 2.5%      |
| Completion: Graduate/Professional             | 3,052       | 6.9%        | 4.4%        | 2.6%      | 3,609       | 5.1%        | 3.2%        | 1.9%      | 3,359       | 5.7%        | 3.8%        | 1.9%      | 4,291       | 4.4%        | 2.9%        | 1.4%      |
| <b>Central State Univ.</b>                    |             |             |             |           |             |             |             |           |             |             |             |           |             |             |             |           |
| Completion: BA/BS                             | 351         | 84.0%       | 52.4%       | 31.6%     | 163         | 95.1%       | 58.9%       | 36.2%     | 144         | 86.1%       | 52.1%       | 34.0%     | 212         | 91.0%       | 50.5%       | 40.6%     |
| Completion: Graduate/Professional             | 4           | 100.0%      | 75.0%       | 25.0%     | 1           | 100.0%      | 100.0%      | 0.0%      | 1           | 0.0%        | 0.0%        | 0.0%      | 2           | 100.0%      | 100.0%      | 0.0%      |
| <b>Cleveland State Univ.</b>                  |             |             |             |           |             |             |             |           |             |             |             |           |             |             |             |           |
| Completion: BA/BS                             | 1,630       | 11.0%       | 8.2%        | 2.9%      | 1,404       | 15.0%       | 10.9%       | 4.1%      | 1,690       | 14.6%       | 10.5%       | 4.1%      | 1,810       | 15.1%       | 10.4%       | 4.6%      |
| Completion: Graduate/Professional             | 1,328       | 6.6%        | 4.7%        | 2.0%      | 941         | 15.5%       | 11.5%       | 4.0%      | 1,612       | 12.4%       | 9.5%        | 2.9%      | 1,619       | 12.7%       | 9.6%        | 3.1%      |

| Institution                                   | 2015        |             |             |           |
|-----------------------------------------------|-------------|-------------|-------------|-----------|
|                                               | Grand Total | Black Total | Black Women | Black Men |
| <b>NEW YORK</b>                               |             |             |             |           |
| <b>SUNY Albany</b>                            |             |             |             |           |
| Completion: BA/BS                             | 2,875       | 13.8%       | 8.5%        | 5.3%      |
| Completion: Graduate/Professional             | 1,435       | 5.2%        | 3.0%        | 2.2%      |
| <b>CUNY, Medgar Evers College</b>             |             |             |             |           |
| Completion: BA/BS                             | 472         | 82.8%       | 62.9%       | 19.9%     |
| Completion: Graduate/Professional             | -           | -           | -           | -         |
| <b>CUNY, City College</b>                     |             |             |             |           |
| Completion: BA/BS                             | 2,156       | 21.8%       | 13.1%       | 8.7%      |
| Completion: Graduate/Professional             | 861         | 17.1%       | 10.9%       | 6.2%      |
| <b>NORTH CAROLINA</b>                         |             |             |             |           |
| <b>Univ. of North Carolina at Chapel Hill</b> |             |             |             |           |
| Completion: BA/BS                             | 4,624       | 8.9%        | 6.0%        | 2.9%      |
| Completion: Graduate/Professional             | 3,360       | 6.5%        | 4.6%        | 1.9%      |
| <b>North Carolina A &amp; T State Univ.</b>   |             |             |             |           |
| Completion: BA/BS                             | 1,293       | 86.6%       | 50.0%       | 36.7%     |
| Completion: Graduate/Professional             | 473         | 62.6%       | 38.9%       | 23.7%     |
| <b>Univ. of North Carolina at Charlotte</b>   |             |             |             |           |
| Completion: BA/BS                             | 4,513       | 14.4%       | 9.7%        | 4.6%      |
| Completion: Graduate/Professional             | 1,467       | 7.9%        | 5.5%        | 2.5%      |
| <b>OHIO</b>                                   |             |             |             |           |
| <b>The Ohio State Univ.</b>                   |             |             |             |           |
| Completion: BA/BS                             | 10,414      | 5.8%        | 3.4%        | 2.5%      |
| Completion: Graduate/Professional             | 4,400       | 4.0%        | 2.5%        | 1.6%      |
| <b>Central State Univ.</b>                    |             |             |             |           |
| Completion: BA/BS                             | 287         | 95.5%       | 51.9%       | 43.6%     |
| Completion: Graduate/Professional             | 4           | 100.0%      | 50.0%       | 50.0%     |
| <b>Cleveland State Univ.</b>                  |             |             |             |           |
| Completion: BA/BS                             | 2,317       | 14.4%       | 9.9%        | 4.5%      |
| Completion: Graduate/Professional             | 1,666       | 11.1%       | 7.7%        | 3.4%      |

| Institution                                   | 1976        |             |             |           | 1979        |             |             |           | 1985        |             |             |           | 1990        |             |             |           |
|-----------------------------------------------|-------------|-------------|-------------|-----------|-------------|-------------|-------------|-----------|-------------|-------------|-------------|-----------|-------------|-------------|-------------|-----------|
|                                               | Grand Total | Black Total | Black Women | Black Men | Grand Total | Black Total | Black Women | Black Men | Grand Total | Black Total | Black Women | Black Men | Grand Total | Black Total | Black Women | Black Men |
| <b>PENNSYLVANIA</b>                           |             |             |             |           |             |             |             |           |             |             |             |           |             |             |             |           |
| <b>Pennsylvania State College, Univ. Park</b> |             |             |             |           |             |             |             |           |             |             |             |           |             |             |             |           |
| Completion: BA/BS                             | 7,562       | 1.5%        | 1.0%        | 0.6%      | 7,802       | 1.2%        | 0.7%        | 0.5%      | 7,662       | 1.5%        | 1.0%        | 0.5%      | 7,783       | 3.6%        | 2.1%        | 1.5%      |
| Completion: Graduate/Professional             | 1,747       | 1.6%        | 0.9%        | 0.7%      | 1,590       | 1.9%        | 1.0%        | 0.9%      | 1,517       | 1.3%        | 0.7%        | 0.7%      | 1,534       | 3.9%        | 1.8%        | 2.1%      |
| <b>Lincoln Univ.</b>                          |             |             |             |           |             |             |             |           |             |             |             |           |             |             |             |           |
| Completion: BA/BS                             | 191         | 91.6%       | 52.9%       | 38.7%     | 181         | 95.0%       | 51.9%       | 43.1%     | 157         | 91.1%       | 46.5%       | 44.6%     | 134         | 91.8%       | 56.0%       | 35.8%     |
| Completion: Graduate/Professional             | -           | -           | -           | -         | 34          | 52.9%       | 23.5%       | 29.4%     | 69          | 75.4%       | 52.2%       | 23.2%     | 85          | 50.6%       | 28.2%       | 22.4%     |
| <b>Temple Univ.</b>                           |             |             |             |           |             |             |             |           |             |             |             |           |             |             |             |           |
| Completion: BA/BS                             | 3,090       | 12.7%       | 7.8%        | 4.9%      | 3,139       | 14.2%       | 9.2%        | 5.0%      | 2,982       | 11.0%       | 7.1%        | 3.9%      | 3,429       | 10.0%       | 6.9%        | 3.1%      |
| Completion: Graduate/Professional             | 2,350       | 10.3%       | 5.9%        | 4.3%      | 2,449       | 8.4%        | 5.2%        | 3.1%      | 1,997       | 6.7%        | 4.4%        | 2.3%      | 1,952       | 8.9%        | 6.3%        | 2.7%      |
| <b>SOUTH CAROLINA</b>                         |             |             |             |           |             |             |             |           |             |             |             |           |             |             |             |           |
| <b>Univ. of South Carolina, Columbia</b>      |             |             |             |           |             |             |             |           |             |             |             |           |             |             |             |           |
| Completion: BA/BS                             | 3,138       | 5.4%        | 3.1%        | 2.3%      | 2,797       | 8.9%        | 5.3%        | 3.6%      | 2,914       | 11.9%       | 7.5%        | 4.4%      | 2,919       | 12.2%       | 8.2%        | 4.0%      |
| Completion: Graduate/Professional             | 2,165       | 9.8%        | 7.0%        | 2.8%      | 1,957       | 8.2%        | 5.6%        | 2.6%      | 1,735       | 5.9%        | 4.1%        | 1.8%      | 2,292       | 6.5%        | 4.9%        | 1.6%      |
| <b>South Carolina State Univ.</b>             |             |             |             |           |             |             |             |           |             |             |             |           |             |             |             |           |
| Completion: BA/BS                             | 448         | 98.2%       | 59.4%       | 38.8%     | 476         | 98.3%       | 62.4%       | 35.9%     | 540         | 98.3%       | 60.9%       | 37.4%     | 439         | 97.0%       | 57.4%       | 39.6%     |
| Completion: Graduate/Professional             | 232         | 83.2%       | 56.0%       | 27.2%     | 180         | 82.2%       | 53.9%       | 28.3%     | 151         | 89.4%       | 70.2%       | 19.2%     | 91          | 90.1%       | 69.2%       | 20.9%     |
| <b>Francis Marion Univ.</b>                   |             |             |             |           |             |             |             |           |             |             |             |           |             |             |             |           |
| Completion: BA/BS                             | 293         | 9.6%        | 5.5%        | 4.1%      | 277         | 10.8%       | 6.5%        | 4.3%      | 317         | 11.0%       | 7.9%        | 3.2%      | 452         | 12.6%       | 9.7%        | 2.9%      |
| Completion: Graduate/Professional             | 72          | 13.9%       | 9.7%        | 4.2%      | 75          | 18.7%       | 13.3%       | 5.3%      | 52          | 19.2%       | 19.2%       | 0.0%      | 118         | 14.4%       | 13.6%       | 0.8%      |
| <b>TENNESSEE</b>                              |             |             |             |           |             |             |             |           |             |             |             |           |             |             |             |           |
| <b>University of Tennessee</b>                |             |             |             |           |             |             |             |           |             |             |             |           |             |             |             |           |
| Completion: BA/BS                             | 3,751       | 2.4%        | 1.5%        | 0.9%      | 3,676       | 3.4%        | 2.0%        | 1.4%      | 3557        | 4.4%        | 2.4%        | 2.0%      | 3047        | 3.6%        | 2.0%        | 1.6%      |
| Completion: Graduate/Professional             | 1,938       | 3.8%        | 2.4%        | 1.4%      | 1,911       | 3.4%        | 2.1%        | 1.3%      | 1559        | 3.0%        | 1.9%        | 1.1%      | 1491        | 4.1%        | 3.0%        | 1.1%      |
| <b>Tennessee State Univ.</b>                  |             |             |             |           |             |             |             |           |             |             |             |           |             |             |             |           |
| Completion: BA/BS                             | 563         | 92.0%       | 51.2%       | 40.9%     | 519         | 96.3%       | 53.6%       | 42.8%     | 509         | 79.2%       | 45.0%       | 34.2%     | 575         | 66.3%       | 41.9%       | 24.3%     |
| Completion: Graduate/Professional             | 283         | 83.7%       | 51.2%       | 32.5%     | 165         | 72.1%       | 29.7%       | 42.4%     | 317         | 21.8%       | 12.9%       | 8.8%      | 198         | 24.2%       | 12.6%       | 11.6%     |
| <b>Middle Tennessee State Univ.</b>           |             |             |             |           |             |             |             |           |             |             |             |           |             |             |             |           |
| Completion: BA/BS                             | 1,433       | 4.5%        | 2.1%        | 2.4%      | 1,359       | 5.2%        | 3.2%        | 2.0%      | 1404        | 6.2%        | 3.7%        | 2.5%      | 1566        | 6.3%        | 3.7%        | 2.6%      |
| Completion: Graduate/Professional             | 647         | 4.6%        | 2.5%        | 2.2%      | 401         | 3.0%        | 1.5%        | 1.5%      | 333         | 4.8%        | 3.9%        | 0.9%      | 350         | 4.9%        | 2.0%        | 2.9%      |

| Institution                                   | 1995        |             |             |           | 2000        |             |             |           | 2005        |             |             |           | 2010        |             |             |           |
|-----------------------------------------------|-------------|-------------|-------------|-----------|-------------|-------------|-------------|-----------|-------------|-------------|-------------|-----------|-------------|-------------|-------------|-----------|
|                                               | Grand Total | Black Total | Black Women | Black Men | Grand Total | Black Total | Black Women | Black Men | Grand Total | Black Total | Black Women | Black Men | Grand Total | Black Total | Black Women | Black Men |
| <b>PENNSYLVANIA</b>                           |             |             |             |           |             |             |             |           |             |             |             |           |             |             |             |           |
| <b>Pennsylvania State College, Univ. Park</b> |             |             |             |           |             |             |             |           |             |             |             |           |             |             |             |           |
| Completion: BA/BS                             | 7,884       | 2.5%        | 1.5%        | 1.1%      | 8,981       | 3.2%        | 2.0%        | 1.3%      | 9,840       | 4.2%        | 2.5%        | 1.7%      | 11,496      | 3.5%        | 2.2%        | 1.3%      |
| Completion: Graduate/Professional             | 1,785       | 3.0%        | 1.6%        | 1.4%      | 1,696       | 4.0%        | 2.4%        | 1.5%      | 1,762       | 3.0%        | 1.7%        | 1.3%      | 2,137       | 2.8%        | 1.5%        | 1.2%      |
| <b>Lincoln Univ.</b>                          |             |             |             |           |             |             |             |           |             |             |             |           |             |             |             |           |
| Completion: BA/BS                             | 264         | 93.9%       | 57.6%       | 36.4%     | 285         | 93.0%       | 56.8%       | 36.1%     | 240         | 86.7%       | 57.5%       | 29.2%     | 277         | 93.1%       | 61.7%       | 31.4%     |
| Completion: Graduate/Professional             | 83          | 55.4%       | 39.8%       | 15.7%     | 216         | 83.3%       | 56.0%       | 27.3%     | 128         | 93.0%       | 59.4%       | 33.6%     | 220         | 79.5%       | 50.9%       | 28.6%     |
| <b>Temple Univ.</b>                           |             |             |             |           |             |             |             |           |             |             |             |           |             |             |             |           |
| Completion: BA/BS                             | 3,202       | 15.9%       | 10.7%       | 5.2%      | 3,119       | 21.9%       | 16.6%       | 5.3%      | 4,263       | 19.9%       | 14.5%       | 5.4%      | 5,493       | 15.9%       | 11.0%       | 4.9%      |
| Completion: Graduate/Professional             | 2,556       | 9.4%        | 6.3%        | 3.0%      | 2,479       | 11.3%       | 7.6%        | 3.7%      | 2,720       | 10.9%       | 8.1%        | 2.8%      | 2,556       | 7.1%        | 5.2%        | 1.9%      |
| <b>SOUTH CAROLINA</b>                         |             |             |             |           |             |             |             |           |             |             |             |           |             |             |             |           |
| <b>Univ. of South Carolina, Columbia</b>      |             |             |             |           |             |             |             |           |             |             |             |           |             |             |             |           |
| Completion: BA/BS                             | 2,904       | 13.9%       | 9.6%        | 4.3%      | 2,973       | 17.6%       | 11.9%       | 5.7%      | 3,260       | 16.0%       | 11.3%       | 4.7%      | 4,135       | 11.1%       | 6.9%        | 4.2%      |
| Completion: Graduate/Professional             | 2,462       | 6.5%        | 4.9%        | 1.6%      | 2,644       | 9.6%        | 7.2%        | 2.3%      | 2,298       | 10.7%       | 8.2%        | 2.5%      | 2,266       | 11.7%       | 9.7%        | 2.0%      |
| <b>South Carolina State Univ.</b>             |             |             |             |           |             |             |             |           |             |             |             |           |             |             |             |           |
| Completion: BA/BS                             | 651         | 96.3%       | 61.4%       | 34.9%     | 679         | 96.3%       | 61.0%       | 35.3%     | 499         | 97.2%       | 57.9%       | 39.3%     | 565         | 94.9%       | 54.7%       | 40.2%     |
| Completion: Graduate/Professional             | 143         | 86.0%       | 68.5%       | 17.5%     | 189         | 78.3%       | 65.6%       | 12.7%     | 171         | 82.5%       | 70.2%       | 12.3%     | 144         | 91.7%       | 75.0%       | 16.7%     |
| <b>Francis Marion Univ.</b>                   |             |             |             |           |             |             |             |           |             |             |             |           |             |             |             |           |
| Completion: BA/BS                             | 532         | 17.3%       | 11.8%       | 5.5%      | 479         | 29.0%       | 20.7%       | 8.4%      | 493         | 31.6%       | 22.3%       | 9.3%      | 524         | 40.5%       | 30.5%       | 9.9%      |
| Completion: Graduate/Professional             | 75          | 10.7%       | 9.3%        | 1.3%      | 120         | 20.0%       | 15.8%       | 4.2%      | 80          | 15.0%       | 11.3%       | 3.8%      | 82          | 23.2%       | 19.5%       | 3.7%      |
| <b>TENNESSEE</b>                              |             |             |             |           |             |             |             |           |             |             |             |           |             |             |             |           |
| <b>University of Tennessee</b>                |             |             |             |           |             |             |             |           |             |             |             |           |             |             |             |           |
| Completion: BA/BS                             | 3433        | 4.4%        | 2.8%        | 1.6%      | 3681        | 3.9%        | 2.4%        | 1.5%      | 3844        | 5.5%        | 3.4%        | 2.0%      | 4393        | 7.5%        | 4.7%        | 2.8%      |
| Completion: Graduate/Professional             | 2188        | 4.8%        | 3.2%        | 1.6%      | 2245        | 4.9%        | 3.5%        | 1.4%      | 2439        | 7.1%        | 5.6%        | 1.5%      | 2738        | 7.1%        | 5.5%        | 1.6%      |
| <b>Tennessee State Univ.</b>                  |             |             |             |           |             |             |             |           |             |             |             |           |             |             |             |           |
| Completion: BA/BS                             | 718         | 70.5%       | 44.2%       | 26.3%     | 950         | 81.1%       | 54.5%       | 26.5%     | 982         | 82.3%       | 55.1%       | 27.2%     | 986         | 76.2%       | 51.4%       | 24.7%     |
| Completion: Graduate/Professional             | 224         | 31.3%       | 24.6%       | 6.7%      | 481         | 38.5%       | 25.6%       | 12.9%     | 456         | 47.1%       | 32.9%       | 14.3%     | 460         | 49.1%       | 36.7%       | 12.4%     |
| <b>Middle Tennessee State Univ.</b>           |             |             |             |           |             |             |             |           |             |             |             |           |             |             |             |           |
| Completion: BA/BS                             | 2106        | 8.3%        | 5.3%        | 3.0%      | 2427        | 7.9%        | 5.1%        | 2.8%      | 3476        | 9.2%        | 5.5%        | 3.7%      | 3650        | 11.0%       | 6.7%        | 4.3%      |
| Completion: Graduate/Professional             | 398         | 6.3%        | 4.5%        | 1.8%      | 484         | 4.8%        | 2.9%        | 1.9%      | 621         | 8.9%        | 6.0%        | 2.9%      | 715         | 9.8%        | 7.6%        | 2.2%      |

| Institution                                   | 2015           |                |                |              |
|-----------------------------------------------|----------------|----------------|----------------|--------------|
|                                               | Grand<br>Total | Black<br>Total | Black<br>Women | Black<br>Men |
| <b>PENNSYLVANIA</b>                           |                |                |                |              |
| <b>Pennsylvania State College, Univ. Park</b> |                |                |                |              |
| Completion: BA/BS                             | 10,876         | 4.7%           | 3.0%           | 1.8%         |
| Completion: Graduate/Professional             | 2,015          | 3.5%           | 2.0%           | 1.4%         |
| <b>Lincoln Univ.</b>                          |                |                |                |              |
| Completion: BA/BS                             | 265            | 74.3%          | 46.8%          | 27.5%        |
| Completion: Graduate/Professional             | 99             | 92.9%          | 56.6%          | 36.4%        |
| <b>Temple Univ.</b>                           |                |                |                |              |
| Completion: BA/BS                             | 6,024          | 12.8%          | 8.1%           | 4.6%         |
| Completion: Graduate/Professional             | 2,638          | 8.0%           | 5.4%           | 2.5%         |
| <b>SOUTH CAROLINA</b>                         |                |                |                |              |
| <b>Univ. of South Carolina, Columbia</b>      |                |                |                |              |
| Completion: BA/BS                             | 5,412          | 10.2%          | 6.6%           | 3.6%         |
| Completion: Graduate/Professional             | 2,374          | 12.3%          | 9.1%           | 3.2%         |
| <b>South Carolina State Univ.</b>             |                |                |                |              |
| Completion: BA/BS                             | 486            | 93.6%          | 53.1%          | 40.5%        |
| Completion: Graduate/Professional             | 131            | 84.0%          | 61.8%          | 22.1%        |
| <b>Francis Marion Univ.</b>                   |                |                |                |              |
| Completion: BA/BS                             | 569            | 38.7%          | 30.8%          | 7.9%         |
| Completion: Graduate/Professional             | 93             | 15.1%          | 11.8%          | 3.2%         |
| <b>TENNESSEE</b>                              |                |                |                |              |
| <b>University of Tennessee</b>                |                |                |                |              |
| Completion: BA/BS                             | 4445           | 6.1%           | 3.6%           | 2.5%         |
| Completion: Graduate/Professional             | 2133           | 4.8%           | 3.0%           | 1.8%         |
| <b>Tennessee State Univ.</b>                  |                |                |                |              |
| Completion: BA/BS                             | 872            | 73.4%          | 48.4%          | 25.0%        |
| Completion: Graduate/Professional             | 462            | 36.4%          | 26.4%          | 10.0%        |
| <b>Middle Tennessee State Univ.</b>           |                |                |                |              |
| Completion: BA/BS                             | 4051           | 15.7%          | 10.0%          | 5.6%         |
| Completion: Graduate/Professional             | 821            | 9.1%           | 5.7%           | 3.4%         |

| Institution                       | 1976        |             |             |           | 1979        |             |             |           | 1985        |             |             |           | 1990        |             |             |           |
|-----------------------------------|-------------|-------------|-------------|-----------|-------------|-------------|-------------|-----------|-------------|-------------|-------------|-----------|-------------|-------------|-------------|-----------|
|                                   | Grand Total | Black Total | Black Women | Black Men | Grand Total | Black Total | Black Women | Black Men | Grand Total | Black Total | Black Women | Black Men | Grand Total | Black Total | Black Women | Black Men |
| <b>TEXAS</b>                      |             |             |             |           |             |             |             |           |             |             |             |           |             |             |             |           |
| <b>Univ. of Texas at Austin</b>   |             |             |             |           |             |             |             |           |             |             |             |           |             |             |             |           |
| Completion: BA/BS                 | 7,126       | 1.0%        | 0.5%        | 0.5%      | 6,657       | 1.5%        | 1.1%        | 0.5%      | 6,958       | 2.0%        | 1.3%        | 0.6%      | 7,146       | 2.9%        | 1.9%        | 1.0%      |
| Completion: Graduate/Professional | 2,464       | 1.1%        | 0.3%        | 0.8%      | 2,575       | 1.6%        | 1.0%        | 0.6%      | 2,699       | 2.2%        | 1.0%        | 1.2%      | 3,282       | 2.2%        | 1.2%        | 1.0%      |
| <b>Texas Southern Univ.</b>       |             |             |             |           |             |             |             |           |             |             |             |           |             |             |             |           |
| Completion: BA/BS                 | 571         | 92.6%       | 53.2%       | 39.4%     | 732         | 63.1%       | 40.4%       | 22.7%     | 623         | 45.4%       | 28.1%       | 17.3%     | 477         | 64.8%       | 41.5%       | 23.3%     |
| Completion: Graduate/Professional | 404         | 82.4%       | 41.6%       | 40.8%     | 364         | 74.2%       | 44.8%       | 29.4%     | 361         | 52.9%       | 32.1%       | 20.8%     | 363         | 52.6%       | 40.2%       | 12.4%     |
| <b>Univ. of Houston-Downtown</b>  |             |             |             |           |             |             |             |           |             |             |             |           |             |             |             |           |
| Completion: BA/BS                 | -           | -           | -           | -         | 109         | 4.6%        | 1.8%        | 2.8%      | 318         | 13.2%       | 6.9%        | 6.3%      | 495         | 19.2%       | 12.1%       | 7.1%      |
| Completion: Graduate/Professional | -           | -           | -           | -         | -           | -           | -           | -         | -           | -           | -           | -         | -           | -           | -           | -         |
| <b>VIRGINIA</b>                   |             |             |             |           |             |             |             |           |             |             |             |           |             |             |             |           |
| <b>Univ. of Virginia</b>          |             |             |             |           |             |             |             |           |             |             |             |           |             |             |             |           |
| Completion: BA/BS                 | 2,275       | 2.5%        | 1.4%        | 1.2%      | 2,442       | 2.8%        | 1.8%        | 1.0%      | 2,658       | 8.7%        | 5.9%        | 2.8%      | 2,812       | 7.1%        | 4.1%        | 3.0%      |
| Completion: Graduate/Professional | 2,024       | 3.1%        | 1.2%        | 1.9%      | 1,014       | 23.7%       | 14.8%       | 8.9%      | 1,831       | 4.3%        | 2.6%        | 1.6%      | 2,114       | 5.1%        | 1.7%        | 3.4%      |
| <b>Norfolk State Univ.</b>        |             |             |             |           |             |             |             |           |             |             |             |           |             |             |             |           |
| Completion: BA/BS                 | 762         | 94.1%       | 54.1%       | 40.0%     | 648         | 93.1%       | 56.9%       | 36.1%     | 501         | 76.8%       | 46.5%       | 30.3%     | 540         | 78.5%       | 51.3%       | 27.2%     |
| Completion: Graduate/Professional | 12          | 91.7%       | 58.3%       | 33.3%     | 70          | 37.1%       | 27.1%       | 10.0%     | 119         | 46.2%       | 37.8%       | 8.4%      | 154         | 51.3%       | 41.6%       | 9.7%      |
| <b>Old Dominion Univ.</b>         |             |             |             |           |             |             |             |           |             |             |             |           |             |             |             |           |
| Completion: BA/BS                 | 1,512       | 1.7%        | 0.9%        | 0.8%      | 1,600       | 3.9%        | 2.4%        | 1.4%      | 1,949       | 6.6%        | 4.2%        | 2.4%      | 1,847       | 8.4%        | 5.4%        | 3.0%      |
| Completion: Graduate/Professional | 481         | 5.4%        | 3.3%        | 2.1%      | 487         | 7.6%        | 6.2%        | 1.4%      | 480         | 9.2%        | 6.7%        | 2.5%      | 626         | 6.9%        | 5.8%        | 1.1%      |

| Institution                       | 1995        |             |             |           | 2000        |             |             |           | 2005        |             |             |           | 2010        |             |             |           |
|-----------------------------------|-------------|-------------|-------------|-----------|-------------|-------------|-------------|-----------|-------------|-------------|-------------|-----------|-------------|-------------|-------------|-----------|
|                                   | Grand Total | Black Total | Black Women | Black Men | Grand Total | Black Total | Black Women | Black Men | Grand Total | Black Total | Black Women | Black Men | Grand Total | Black Total | Black Women | Black Men |
| <b>TEXAS</b>                      |             |             |             |           |             |             |             |           |             |             |             |           |             |             |             |           |
| <b>Univ. of Texas at Austin</b>   |             |             |             |           |             |             |             |           |             |             |             |           |             |             |             |           |
| Completion: BA/BS                 | 7,189       | 2.8%        | 1.8%        | 1.0%      | 7,826       | 3.5%        | 2.2%        | 1.3%      | 8,836       | 3.3%        | 2.0%        | 1.3%      | 8,838       | 4.1%        | 2.8%        | 1.3%      |
| Completion: Graduate/Professional | 3,925       | 3.3%        | 2.1%        | 1.2%      | 3,716       | 2.2%        | 1.4%        | 0.8%      | 4,304       | 2.7%        | 1.9%        | 0.8%      | 4,288       | 3.0%        | 1.9%        | 1.1%      |
| <b>Texas Southern Univ.</b>       |             |             |             |           |             |             |             |           |             |             |             |           |             |             |             |           |
| Completion: BA/BS                 | 563         | 81.7%       | 58.3%       | 23.4%     | 465         | 91.0%       | 59.1%       | 31.8%     | 538         | 88.8%       | 60.4%       | 28.4%     | 797         | 89.1%       | 54.8%       | 34.3%     |
| Completion: Graduate/Professional | 418         | 65.3%       | 41.4%       | 23.9%     | 391         | 66.0%       | 39.1%       | 26.9%     | 465         | 68.8%       | 50.3%       | 18.5%     | 417         | 63.3%       | 45.1%       | 18.2%     |
| <b>Univ. of Houston-Downtown</b>  |             |             |             |           |             |             |             |           |             |             |             |           |             |             |             |           |
| Completion: BA/BS                 | 682         | 25.2%       | 17.4%       | 7.8%      | 1,155       | 25.1%       | 18.2%       | 6.9%      | 1,619       | 24.5%       | 18.6%       | 5.9%      | 2,336       | 25.3%       | 18.3%       | 7.0%      |
| Completion: Graduate/Professional | -           | -           | -           | -         | -           | -           | -           | -         | 50          | 30.0%       | 28.0%       | 2.0%      | 40          | 20.0%       | 15.0%       | 5.0%      |
| <b>VIRGINIA</b>                   |             |             |             |           |             |             |             |           |             |             |             |           |             |             |             |           |
| <b>Univ. of Virginia</b>          |             |             |             |           |             |             |             |           |             |             |             |           |             |             |             |           |
| Completion: BA/BS                 | 2,857       | 11.7%       | 7.5%        | 4.2%      | 3,132       | 10.4%       | 6.4%        | 4.0%      | 3,353       | 8.2%        | 5.3%        | 2.9%      | 3,561       | 7.0%        | 4.5%        | 2.5%      |
| Completion: Graduate/Professional | 2,291       | 5.4%        | 3.4%        | 2.0%      | 2,166       | 5.7%        | 3.3%        | 2.4%      | 2,458       | 5.2%        | 3.1%        | 2.2%      | 2,621       | 3.7%        | 2.4%        | 1.3%      |
| <b>Norfolk State Univ.</b>        |             |             |             |           |             |             |             |           |             |             |             |           |             |             |             |           |
| Completion: BA/BS                 | 920         | 80.8%       | 55.0%       | 25.8%     | 825         | 83.6%       | 53.3%       | 30.3%     | 722         | 87.3%       | 63.3%       | 24.0%     | 712         | 88.3%       | 59.7%       | 28.7%     |
| Completion: Graduate/Professional | 172         | 48.8%       | 33.7%       | 15.1%     | 192         | 72.4%       | 57.8%       | 14.6%     | 222         | 75.2%       | 61.7%       | 13.5%     | 220         | 63.2%       | 55.0%       | 8.2%      |
| <b>Old Dominion Univ.</b>         |             |             |             |           |             |             |             |           |             |             |             |           |             |             |             |           |
| Completion: BA/BS                 | 1,926       | 10.8%       | 7.1%        | 3.7%      | 2,170       | 16.1%       | 11.0%       | 5.1%      | 2,352       | 19.7%       | 14.5%       | 5.3%      | 3,129       | 19.4%       | 14.2%       | 5.2%      |
| Completion: Graduate/Professional | 1,204       | 8.7%        | 5.9%        | 2.8%      | 1,266       | 11.4%       | 8.5%        | 2.9%      | 1,375       | 11.3%       | 8.3%        | 3.0%      | 1,471       | 10.4%       | 7.6%        | 2.8%      |

| Institution                       | 2015           |                |                |              |
|-----------------------------------|----------------|----------------|----------------|--------------|
|                                   | Grand<br>Total | Black<br>Total | Black<br>Women | Black<br>Men |
| <b>TEXAS</b>                      |                |                |                |              |
| <b>Univ. of Texas at Austin</b>   |                |                |                |              |
| Completion: BA/BS                 | 9,503          | 3.9%           | 2.3%           | 1.6%         |
| Completion: Graduate/Professional | 4,567          | 2.9%           | 1.8%           | 1.1%         |
| <b>Texas Southern Univ.</b>       |                |                |                |              |
| Completion: BA/BS                 | 927            | 77.3%          | 48.8%          | 28.6%        |
| Completion: Graduate/Professional | 622            | 67.5%          | 43.2%          | 24.3%        |
| <b>Univ. of Houston-Downtown</b>  |                |                |                |              |
| Completion: BA/BS                 | 2,338          | 23.2%          | 16.6%          | 6.5%         |
| Completion: Graduate/Professional | 97             | 29.9%          | 18.6%          | 11.3%        |
| <b>VIRGINIA</b>                   |                |                |                |              |
| <b>Univ. of Virginia</b>          |                |                |                |              |
| Completion: BA/BS                 | 3,836          | 6.5%           | 4.0%           | 2.5%         |
| Completion: Graduate/Professional | 2,651          | 4.6%           | 2.6%           | 2.0%         |
| <b>Norfolk State Univ.</b>        |                |                |                |              |
| Completion: BA/BS                 | 992            | 80.2%          | 55.6%          | 24.6%        |
| Completion: Graduate/Professional | 199            | 72.9%          | 52.8%          | 20.1%        |
| <b>Old Dominion Univ.</b>         |                |                |                |              |
| Completion: BA/BS                 | 3,858          | 21.0%          | 14.2%          | 6.7%         |
| Completion: Graduate/Professional | 1,335          | 9.9%           | 7.2%           | 2.7%         |
